# Supplementary material for: Accounting for biases in riboprofiling data indicates a major role for proline in stalling translation
Source: HighWire-hosted journal article supplement (doi:10.1101/gr.175893.114), 2014-10-07
Supplement: Supplemental_Table_S3.xlsx [file Supplemental_Table_S3.xlsx]

## Sheet: INFO
Supplementary Table S3.
This file contains the the position-specific average codon-level log2(Ribo/mRNA) values used to draw all heatmaps in the manuscript.
The positions, -8 to +8 codons relative to the 5' end of reads, are presented as follows:
HEADER	POS-8	POS-7	POS-6	POS-5	POS-4	POS-3	POS-2	POS-1	POS0	POS1	POS2	POS3	POS4	POS5	POS6	POS7	POS8
POSITION IN FIGURE	-8	-7	-6	-5	-4	-3	-2	-1	0	1	2	3	4	5	6	7	8

## Sheet: FIgure_4A
CODON	POS-8	POS-7	POS-6	POS-5	POS-4	POS-3	POS-2	POS-1	POS0	POS1	POS2	POS3	POS4	POS5	POS6	POS7	POS8
AAA	-0.00700733	-0.0156662	-0.0074962	-0.0180419	-0.0272586	-0.00106825	-0.0346159	0.00655455	-0.685568	-0.0968023	-0.269415	-0.0951679	-0.00295186	0.0783728	-0.243248	-0.178844	-0.772059
AAC	-0.0657135	-0.0520836	-0.0501961	-0.0638725	-0.0362517	-0.0457938	-0.0660227	-0.0398274	-0.226124	-0.077469	-0.146245	-0.166011	0.267876	-0.107557	-0.254443	-0.228189	-0.134616
AAG	-0.0980696	-0.117542	-0.115614	-0.0780033	-0.0863869	-0.115786	-0.139164	-0.150735	-0.28258	-0.202065	-0.327572	0.017285	0.142544	0.0535952	-0.235087	-0.230772	0.107109
AAT	0.0369065	0.0388855	0.0118769	0.0267074	0.0285722	0.0142254	0.0255606	-0.113694	-0.470186	-0.119278	-0.145605	-0.198532	0.282129	-0.107253	-0.182688	-0.0872372	0.0488878
ACA	0.0347074	0.043374	0.0472912	0.0381968	0.0216231	0.0514997	0.0325556	0.109526	-0.492883	0.0647115	-0.0699661	0.104277	-0.0338498	-0.191286	-0.104539	-0.111111	-0.340972
ACC	-0.0873151	-0.0798933	-0.0845265	-0.0767629	-0.0428418	-0.0634319	-0.0481162	-0.0430531	-0.0896923	0.304299	0.113783	0.112758	0.223956	-0.0641266	0.0539174	-0.043029	-0.192357
ACG	0.0828204	0.0634284	0.0362162	0.0715958	0.0706857	0.0614698	0.0669546	0.116944	-0.19448	0.229189	-0.0342643	0.215498	0.444953	0.00504282	0.0793939	0.0273887	0.267924
ACT	-0.078187	-0.0563164	-0.0181057	-0.0614758	-0.0553321	-0.0423091	-0.0196819	-0.162163	-0.347895	0.122805	-0.0172365	-0.00240566	0.173004	-0.337939	-0.0174384	-0.000600664	-0.0358944
AGA	-0.0455038	-0.0752809	-0.0306307	-0.0685943	-0.0808268	-0.0577778	-0.0922992	-0.0158602	-0.228835	-0.0535306	-0.161285	-0.172188	-0.176262	0.120913	-0.180554	-0.145268	-0.293589
AGC	0.0368849	0.0200964	0.0239838	0.0808467	0.0324493	0.0290037	0.0320759	0.0905303	0.0810376	0.0623912	0.0850808	0.0658761	-0.38495	0.224257	-0.0149567	-0.0393041	0.0180439
AGG	0.111805	0.10374	0.119055	0.0882857	0.0872521	0.0846687	0.0479078	0.0776609	0.0868504	0.0613502	0.0478338	0.107041	-0.436249	0.32407	0.0949192	-0.05975	0.255877
AGT	0.0121122	0.00877329	0.0305319	0.0394095	0.0344981	0.00905974	0.0228641	-0.054954	-0.188267	-0.0887638	-0.067028	-0.100285	-0.329602	0.0983246	-0.0656285	-0.0320537	0.124021
ATA	0.10255	0.122237	0.123236	0.0854747	0.106275	0.0979578	0.110533	0.168151	-0.508802	-0.0607442	0.000720999	-0.0296648	-0.634041	-0.00756014	-0.0331818	-0.0671562	-0.224838
ATC	-0.0924274	-0.0866618	-0.0956168	-0.0901394	-0.0879721	-0.0605108	-0.0378631	-0.0462511	-0.440623	-0.0416782	0.0882137	-0.075013	-0.20666	0.13387	-0.0561745	-0.198154	-0.136918
ATG	-0.034376	-0.0167883	-0.0315255	-0.0521619	-0.0305679	-0.0576557	-0.0161776	-0.0213688	-0.393476	-0.118659	-0.152305	0.0598615	-0.294557	-0.072994	-0.0965038	-0.198858	0.138125
ATT	-0.0577989	-0.0624815	-0.0428029	-0.0367373	-0.0317603	-0.0168223	-0.00626384	-0.0843446	-0.680645	-0.22247	-0.0798281	-0.301721	-0.27545	0.0407093	-0.0969593	-0.0759957	0.0556058
CAA	-0.0337723	-0.0149669	-0.0450186	-0.0338449	-0.028116	-0.0241076	-0.0266654	-0.00743626	0.0460699	-0.34216	-0.236027	-0.13257	-0.165015	-0.52988	-0.11793	-0.155198	-0.624807
CAC	-0.0243853	0.00866035	-0.0415706	-0.0550278	-0.0692575	-0.0524114	-0.00762177	-0.025649	0.320047	-0.132393	-0.0194131	0.177469	0.0685144	-0.963369	0.0609735	0.0326363	-0.114973
CAG	0.0754502	0.0715205	0.0975112	0.106128	0.0811328	0.0828299	0.0425244	0.0449204	0.300734	-0.135586	-0.102172	0.132594	0.357513	-0.101163	0.0934687	0.0352017	0.31096
CAT	0.078065	0.0879299	0.0569782	0.0243578	0.0305913	0.0417259	0.059055	-0.0967618	0.168276	-0.287164	-0.166992	-0.00605324	0.173878	-0.862834	0.0347073	0.010776	0.0176039
CCA	-0.0752726	-0.0841672	-0.120736	-0.0962349	-0.0745236	-0.0939418	-0.122317	0.0260407	0.0609016	-0.296959	0.0388057	-0.0244931	0.551858	0.444337	0.119387	-0.00269304	-0.362507
CCC	0.0636782	0.100098	0.0866644	0.0576099	0.0445755	0.0439009	0.0450864	0.103685	0.702783	0.354176	0.449497	0.265993	0.795818	0.254701	0.519762	0.398631	0.203645
CCG	0.141381	0.200055	0.171709	0.186303	0.134191	0.152193	0.107186	0.195857	0.408811	0.120651	0.0519565	0.192856	0.580195	0.465882	0.360067	0.283208	0.259451
CCT	0.0564537	0.0796551	0.0470849	0.0376497	0.0355212	-0.0029878	0.00514567	-0.0596133	0.500379	0.0458858	0.186981	0.0369792	0.855774	0.046772	0.349663	0.301794	0.0874498
CGA	0.296684	0.222373	0.229436	0.183087	0.176655	0.193315	0.246783	0.186576	0.415524	-0.0181147	0.229515	0.101693	-0.41993	-0.417398	0.0676019	0.123156	-0.0830566
CGC	0.0848471	0.0714617	0.0649968	0.0631988	0.0252532	0.0815099	0.0769653	0.194358	0.556016	0.0289132	0.313713	0.204317	-0.174155	0.139835	0.237441	0.208952	0.179936
CGG	0.103106	0.252772	0.207647	0.12104	0.158053	0.203401	0.226948	0.205262	0.584648	-0.0182166	0.0509984	0.128014	0.729711	-0.568923	0.317473	0.037306	0.413778
CGT	-0.00708765	-0.0232718	-0.00319806	-0.0162473	-0.0173857	-0.0584626	-0.0252111	-0.0698398	0.338368	-0.202353	0.0554744	-0.170604	-0.220204	-0.234113	0.187145	0.146033	0.0914739
CTA	-0.00500979	-0.00519026	-0.0179151	-0.0233268	-0.0349465	0.000356339	0.021825	0.0860619	0.102464	-0.315967	0.150152	0.0912189	-0.138444	0.039557	0.158631	-0.0297521	-0.33089
CTC	0.0696613	0.0379248	0.0849225	0.0926621	0.112206	0.0628228	0.0875897	0.0561621	0.467982	0.0580458	0.440796	0.34833	-0.246668	0.0197207	0.307258	0.204708	0.186482
CTG	0.112902	0.0510907	0.0695651	0.0910076	0.0847968	0.0623028	0.0830297	0.0801706	0.349753	-0.203065	0.184949	0.344732	-0.0851462	0.048228	0.262174	0.0874686	0.26693
CTT	0.0756983	0.0638924	0.0827209	0.094109	0.0906332	0.096943	0.0926535	0.00542742	0.270367	-0.170944	0.206494	0.122876	0.0153825	-0.164616	0.261662	0.216802	0.140621
GAA	-0.0912921	-0.0967596	-0.118341	-0.0973019	-0.0899528	-0.092651	-0.12993	-0.110622	-0.036043	-0.00842203	-0.311167	-0.162642	-0.174668	0.233846	-0.323447	-0.167862	-0.591302
GAC	-0.0452009	-0.0672064	-0.0805002	-0.0871326	-0.0840647	-0.0757132	-0.117052	-0.10726	0.124138	0.0153383	-0.0400873	0.0721582	0.142541	0.0704387	-0.182271	-0.0747705	-0.0132703
GAG	-0.0253191	-0.00709655	-0.0154186	-0.0262691	-0.0118451	-0.0441609	-0.0685024	-0.0440907	0.215731	0.216465	-0.169213	0.102395	0.170942	0.432866	-0.0971199	-0.0268066	0.296193
GAT	-0.0130453	-0.0145577	-0.0354053	-0.0238834	-0.0189814	-0.0506393	-0.0635312	-0.203346	0.0581742	-0.107309	-0.166806	-0.0961452	0.167592	-0.115602	-0.204793	-0.0319506	0.0757227
GCA	0.0351902	0.0304185	0.0281022	0.0223089	-0.0129004	-0.000115197	-0.00616812	0.0789791	-0.261535	0.219605	0.0753315	0.131454	-0.337431	0.152446	-0.254076	-0.0415535	-0.38838
GCC	-0.0957407	-0.0785759	-0.094784	-0.0615999	-0.0842128	-0.0997352	-0.0814433	-0.0256131	0.175753	0.352601	0.222436	0.0786243	0.00443729	0.196775	-0.177732	0.0197085	-0.0914375
GCG	0.0346755	0.084509	0.0438378	0.0686731	0.0497502	0.0500048	0.0579533	0.107273	0.107159	0.425273	0.123385	0.281727	-0.494817	-0.136458	-0.0567906	0.122502	0.283595
GCT	-0.114678	-0.141935	-0.140902	-0.113757	-0.124882	-0.112655	-0.132066	-0.248599	-0.0735528	0.231267	0.0862511	-0.0598817	0.0298414	-0.0643618	-0.210275	0.0370091	-0.0426589
GGA	-0.00508692	0.0292408	0.0470589	0.0365845	0.0353578	0.0701827	0.0619515	0.0990166	0.278085	0.126618	0.00318826	0.0875101	0.244546	0.208763	-0.0893889	-0.00533708	-0.269666
GGC	-0.0189542	-0.0134483	-0.0310065	-0.0535484	-0.0305556	-0.0413673	-0.0161814	0.108336	0.339314	0.180705	0.156064	0.131513	0.182194	0.386349	-0.0221375	0.0494321	0.0616249
GGG	0.0620377	0.0627234	0.0270214	0.0737099	0.0581679	0.0643652	0.077445	0.0543523	0.401993	0.384316	0.102126	0.336813	0.193929	0.618052	0.180342	0.161347	0.339076
GGT	-0.132586	-0.143661	-0.110224	-0.151589	-0.129749	-0.13979	-0.12527	-0.217863	0.142209	-0.0297431	-0.148704	-0.184982	0.135967	0.0255248	-0.213627	-0.0601857	0.00021645
GTA	0.0871044	0.0216148	0.0460955	0.0206158	0.0575101	0.0654371	0.0144073	0.147787	-0.0573907	-0.0178722	0.0306619	-0.151801	-0.314248	0.155111	-0.214174	-0.000191017	-0.17631
GTC	-0.123836	-0.11668	-0.14208	-0.151633	-0.123769	-0.111004	-0.0837365	-0.100068	0.0547079	0.016893	0.138151	-0.159857	-0.499711	-0.00321109	-0.177419	-0.0534579	-0.0617236
GTG	0.0531523	0.0391447	0.0110179	0.00532113	0.0294804	0.0441732	0.0450938	0.0895382	0.191081	0.093318	0.0107996	-0.126878	-0.0416919	-0.0304897	-0.14935	-0.00319364	0.291491
GTT	-0.0890771	-0.0936647	-0.0605115	-0.0757426	-0.0853629	-0.0815508	-0.0724978	-0.185233	-0.0160822	-0.0815894	-0.0134038	-0.311394	-0.43608	-0.101988	-0.238234	0.0214079	0.138416
TAC	-0.0980584	-0.102439	-0.085929	-0.0674161	-0.0792429	-0.0860117	-0.0623437	-0.0424595	-0.070711	-0.111097	-0.157438	-0.21733	-0.293336	0.298188	-0.0837776	-0.183575	-0.0717223
TAT	-0.00345255	-0.011888	-0.00162045	0.0308856	0.0135616	0.0310615	0.0369316	-0.0775439	-0.176547	-0.151555	-0.201628	-0.329059	-0.179519	0.187934	-0.060641	-0.0373101	0.104141
TCA	0.0524154	0.0611314	0.0375312	0.0490157	0.0426996	0.0385341	0.03411	0.126384	-0.35239	0.0295947	0.019454	0.0815684	0.0191424	0.136066	0.0506853	0.0189355	-0.189814
TCC	-0.0842402	-0.0738832	-0.0825977	-0.0309535	-0.0477212	-0.015486	-0.0390915	-0.0771513	0.202637	0.336399	0.264224	0.200943	0.346686	0.408658	0.277665	0.185394	0.0417934
TCG	0.102238	0.0805971	0.106062	0.0984181	0.118623	0.111479	0.103847	0.139377	-0.0122323	0.151607	0.0179697	0.252566	0.125843	0.198262	0.21088	0.12478	0.266873
TCT	-0.0482691	-0.0587492	-0.0284738	-0.0384917	-0.0286626	0.0044094	-0.0309193	-0.185777	-0.0822906	0.102002	0.0278225	0.0131108	0.277329	0.0666912	0.146559	0.136421	0.0359053
TGC	-0.0203841	-0.00965559	0.00233232	0.032558	0.0744323	0.0123087	0.00637491	0.0865306	0.11726	0.11619	0.0562662	-0.165484	0.121645	-0.0451963	0.106704	-0.00600829	-0.0833801
TGG	0.0062258	-0.00268528	0.0145357	0.0103653	-0.01911	-0.00662064	-0.0318515	0.0209598	0.0509668	-0.159268	-0.250503	-0.107614	-0.415264	-0.425197	0.0235563	-0.119661	0.130182
TGT	-0.0810645	-0.0660237	-0.0804004	-0.0453274	-0.0160951	-0.0699115	-0.0756231	-0.103429	-0.134806	-0.0969622	-0.195113	-0.442347	0.183299	-0.524014	-0.0736076	-0.057647	0.0396813
TTA	-0.0349166	-0.0496841	-0.0278808	-0.00891083	-0.0208105	-0.0183363	-0.00603457	0.0917554	-0.526982	-0.134725	-0.0750297	-0.101723	-0.185184	-0.0644142	-0.0924938	-0.102252	-0.0634976
TTC	-0.081004	-0.0786087	-0.0507507	-0.0824627	-0.0728874	-0.0571543	-0.0296629	-0.0403627	-0.290263	-0.00831463	-0.00906336	-0.105338	-0.122185	0.0776347	0.0912324	-0.0389813	-0.014974
TTG	-0.113169	-0.153404	-0.0912446	-0.0831407	-0.0766246	-0.0991952	-0.107059	-0.0998259	-0.45454	-0.204107	-0.164242	-0.0708413	-0.135636	0.00815271	-0.0812746	-0.16873	0.157879
TTT	0.0225498	0.0135678	0.0280008	0.033504	0.0263094	0.0340246	0.0496271	-0.0433814	-0.444798	-0.135268	-0.131342	-0.332023	-0.155132	-0.158003	0.0486944	0.07244	0.268899

## Sheet: Supplemental_Figure_S9
ARTIERI DATA FIRST FRAME																			ARTIERI DATA SECOND FRAME																			ARTIERI DATA THIRD FRAME
CODON	POS-8	POS-7	POS-6	POS-5	POS-4	POS-3	POS-2	POS-1	POS0	POS1	POS2	POS3	POS4	POS5	POS6	POS7	POS8		CODON	POS-8	POS-7	POS-6	POS-5	POS-4	POS-3	POS-2	POS-1	POS0	POS1	POS2	POS3	POS4	POS5	POS6	POS7	POS8		CODON	POS-8	POS-7	POS-6	POS-5	POS-4	POS-3	POS-2	POS-1	POS0	POS1	POS2
AAA	-0.00700733	-0.0156662	-0.0074962	-0.0180419	-0.0272586	-0.00106825	-0.0346159	0.00655455	-0.685568	-0.0968023	-0.269415	-0.0951679	-0.00295186	0.0783728	-0.243248	-0.178844	-0.772059		AAA	-0.00999265	-0.0186824	-0.0180029	0.0261561	-0.0225083	-0.00468019	0.0240312	-0.0297012	-0.284313	-0.0702923	-0.0562328	-0.0367967	0.101982	0.168916	-0.000136797	0.0222466	-0.197748		AAA	0.0177036	0.00457024	0.00218803	-0.00117304	0.00376842	0.0178323	0.00229003	0.00865826	-0.468899	0.205793	0.057839
AAC	-0.0657135	-0.0520836	-0.0501961	-0.0638725	-0.0362517	-0.0457938	-0.0660227	-0.0398274	-0.226124	-0.077469	-0.146245	-0.166011	0.267876	-0.107557	-0.254443	-0.228189	-0.134616		AAC	-0.0891773	-0.039821	-0.0686218	-0.0603821	-0.0963054	-0.0669121	-0.0761499	-0.0989672	-0.633861	-0.0777024	-0.151481	-0.157578	0.0790334	-0.105944	-0.206309	-0.190227	-0.1978		AAC	-0.0709539	-0.0995446	-0.0595364	-0.0839096	-0.0781137	-0.0811931	-0.103727	-0.0674416	-0.236344	-0.303369	-0.242086
AAG	-0.0980696	-0.117542	-0.115614	-0.0780033	-0.0863869	-0.115786	-0.139164	-0.150735	-0.28258	-0.202065	-0.327572	0.017285	0.142544	0.0535952	-0.235087	-0.230772	0.107109		AAG	-0.13788	-0.11881	-0.167647	-0.115069	-0.113932	-0.12562	-0.127943	-0.0616687	-0.437678	-0.318751	-0.182586	-0.132577	0.0949432	0.0504614	-0.145443	-0.19604	0.0235291		AAG	-0.168212	-0.141095	-0.150531	-0.141582	-0.122233	-0.112121	-0.152772	-0.204147	0.240079	-0.442246	0.203569
AAT	0.0369065	0.0388855	0.0118769	0.0267074	0.0285722	0.0142254	0.0255606	-0.113694	-0.470186	-0.119278	-0.145605	-0.198532	0.282129	-0.107253	-0.182688	-0.0872372	0.0488878		AAT	0.0534373	0.0490519	0.0500202	0.0378183	0.0582525	0.0229896	0.0499693	0.0578789	-0.497158	-0.0781137	0.056376	-0.00641129	0.250228	0.0155247	-0.0427098	-0.00727953	0.167511		AAT	0.082287	0.0381163	0.0466909	0.06738	0.0588641	0.057368	0.0577346	0.0593371	0.194495	-0.0473421	-0.006248
ACA	0.0347074	0.043374	0.0472912	0.0381968	0.0216231	0.0514997	0.0325556	0.109526	-0.492883	0.0647115	-0.0699661	0.104277	-0.0338498	-0.191286	-0.104539	-0.111111	-0.340972		ACA	0.0899199	0.0375886	0.0820941	0.047638	0.0540144	0.0532625	0.0444397	-0.00682151	0.447153	-0.228948	-0.0681014	-0.0273512	-0.0140965	-0.13722	-0.0622597	-0.0771386	-0.203558		ACA	0.0633904	0.0324804	0.0946701	0.0603457	0.0594715	0.0646088	0.0865097	0.0649214	-0.475008	0.34553	-0.0507027
ACC	-0.0873151	-0.0798933	-0.0845265	-0.0767629	-0.0428418	-0.0634319	-0.0481162	-0.0430531	-0.0896923	0.304299	0.113783	0.112758	0.223956	-0.0641266	0.0539174	-0.043029	-0.192357		ACC	-0.0934451	-0.137008	-0.142755	-0.0678297	-0.0664983	-0.0721674	-0.0793108	-0.104931	0.385168	-0.0567784	-0.0865666	-0.0435008	0.0503596	-0.105298	-0.0604358	-0.0877564	-0.365419		ACC	-0.119051	-0.12369	-0.129449	-0.137306	-0.0652757	-0.107629	-0.097513	-0.0590924	-0.204287	0.0668524	-0.0255934
ACG	0.0828204	0.0634284	0.0362162	0.0715958	0.0706857	0.0614698	0.0669546	0.116944	-0.19448	0.229189	-0.0342643	0.215498	0.444953	0.00504282	0.0793939	0.0273887	0.267924		ACG	0.0667931	0.103128	0.155726	0.124316	0.110099	0.0133567	0.097535	0.0980182	0.624999	-0.0261445	-0.0530184	0.00886641	0.236654	-0.0140662	0.00284257	0.0398586	0.118867		ACG	0.111225	0.07707	0.119894	0.160617	0.169988	0.0916299	0.0874943	0.0453901	0.428045	0.217394	0.211397
ACT	-0.078187	-0.0563164	-0.0181057	-0.0614758	-0.0553321	-0.0423091	-0.0196819	-0.162163	-0.347895	0.122805	-0.0172365	-0.00240566	0.173004	-0.337939	-0.0174384	-0.000600664	-0.0358944		ACT	-0.0613479	-0.0864208	-0.0684332	-0.0652496	-0.0577813	-0.104665	-0.0774521	-0.0534089	0.375061	-0.428715	-0.0926553	-0.0687807	0.048298	-0.307783	-0.0495146	-0.0390169	-0.0533436		ACT	-0.0851559	-0.0995079	-0.0612731	-0.069278	-0.0773937	-0.0797948	-0.0627068	-0.0475139	0.211231	0.23433	-0.0740465
AGA	-0.0455038	-0.0752809	-0.0306307	-0.0685943	-0.0808268	-0.0577778	-0.0922992	-0.0158602	-0.228835	-0.0535306	-0.161285	-0.172188	-0.176262	0.120913	-0.180554	-0.145268	-0.293589		AGA	-0.0920152	-0.0992206	-0.101086	-0.0692762	-0.0969646	-0.109591	-0.131043	-0.167668	0.00864502	0.0631897	-0.0571887	-0.181966	-0.147085	0.101354	-0.0991189	-0.139561	-0.123388		AGA	-0.0947554	-0.111272	-0.0954616	-0.0893929	-0.0962554	-0.128027	-0.128651	-0.143242	-0.587493	-0.183939	-0.0338898
AGC	0.0368849	0.0200964	0.0239838	0.0808467	0.0324493	0.0290037	0.0320759	0.0905303	0.0810376	0.0623912	0.0850808	0.0658761	-0.38495	0.224257	-0.0149567	-0.0393041	0.0180439		AGC	0.0340821	0.0280019	-0.00632938	0.0397538	0.0217847	0.0177846	0.0373599	-0.0104861	-0.162165	0.170395	0.0676798	0.0998706	-0.241518	0.0715914	0.0591995	-0.0196375	-0.119295		AGC	0.05998	0.0368649	0.0415092	0.0412997	0.0922535	0.0473023	0.0565813	0.0863633	0.153301	-0.217433	-0.0519547
AGG	0.111805	0.10374	0.119055	0.0882857	0.0872521	0.0846687	0.0479078	0.0776609	0.0868504	0.0613502	0.0478338	0.107041	-0.436249	0.32407	0.0949192	-0.05975	0.255877		AGG	0.158842	0.130854	0.123549	0.100688	0.0994645	0.106123	0.071058	0.0986843	0.415038	0.187307	0.201204	0.0613056	-0.0562149	0.290218	0.18719	0.0354555	0.146661		AGG	0.141414	0.129563	0.157776	0.0889378	0.091275	0.0579991	0.135535	0.055597	0.559614	-0.019877	0.32925
AGT	0.0121122	0.00877329	0.0305319	0.0394095	0.0344981	0.00905974	0.0228641	-0.054954	-0.188267	-0.0887638	-0.067028	-0.100285	-0.329602	0.0983246	-0.0656285	-0.0320537	0.124021		AGT	0.0566471	0.0413179	0.0317557	0.0367891	0.0179062	0.0358025	0.0533407	0.0419607	0.116854	0.0268653	0.111499	0.0122056	-0.175229	0.0482463	-0.00341071	0.0718668	0.126189		AGT	0.053991	0.0248027	0.0392033	0.0287371	0.0571826	0.00777947	0.0507546	0.0152772	0.311948	-0.17186	0.00205608
ATA	0.10255	0.122237	0.123236	0.0854747	0.106275	0.0979578	0.110533	0.168151	-0.508802	-0.0607442	0.000720999	-0.0296648	-0.634041	-0.00756014	-0.0331818	-0.0671562	-0.224838		ATA	0.0686373	0.0927666	0.0615528	0.0838825	0.102783	0.100451	0.141478	0.102232	-0.0982902	-0.057349	0.0441062	-0.0262354	-0.229685	0.010538	0.0181169	0.0349203	0.0620628		ATA	0.165171	0.117672	0.182635	0.162194	0.170516	0.125744	0.17703	0.17729	-0.413518	0.310084	0.0213997
ATC	-0.0924274	-0.0866618	-0.0956168	-0.0901394	-0.0879721	-0.0605108	-0.0378631	-0.0462511	-0.440623	-0.0416782	0.0882137	-0.075013	-0.20666	0.13387	-0.0561745	-0.198154	-0.136918		ATC	-0.0837792	-0.113943	-0.121097	-0.140185	-0.0769837	-0.0913683	-0.0917818	-0.0818938	-0.30016	-0.0984955	-0.10789	-0.134445	-0.234069	-0.00235848	-0.0805771	-0.162757	-0.288342		ATC	-0.146678	-0.154957	-0.133038	-0.110192	-0.127756	-0.116315	-0.0998498	-0.0891686	-0.418961	-0.0179515	-0.301594
ATG	-0.034376	-0.0167883	-0.0315255	-0.0521619	-0.0305679	-0.0576557	-0.0161776	-0.0213688	-0.393476	-0.118659	-0.152305	0.0598615	-0.294557	-0.072994	-0.0965038	-0.198858	0.138125		ATG	-0.0616996	-0.0537217	-0.060938	-0.0386458	-0.0668757	-0.0236227	-0.037676	0.00330676	0.0215996	-0.28654	-0.0826738	-0.0418284	-0.197653	-0.0938287	-0.0755482	-0.110545	0.0797949		ATG	-0.0757747	-0.0574765	-0.0365196	-0.0455657	-0.058198	-0.0353023	-0.0548098	-0.0406179	0.258547	-0.218057	0.111255
ATT	-0.0577989	-0.0624815	-0.0428029	-0.0367373	-0.0317603	-0.0168223	-0.00626384	-0.0843446	-0.680645	-0.22247	-0.0798281	-0.301721	-0.27545	0.0407093	-0.0969593	-0.0759957	0.0556058		ATT	-0.0419864	-0.0731505	-0.0654611	-0.00994363	0.00366601	-0.0195974	-0.0233057	-0.00015398	-0.161517	-0.2936	-0.0263354	-0.0912032	-0.222444	-0.0161759	-0.0588169	-0.0946413	0.124074		ATT	-0.0565649	-0.0649788	-0.0671544	-0.0667386	-0.048731	-0.0358316	-0.0403572	-0.0544399	0.0715628	0.0168654	-0.13263
CAA	-0.0337723	-0.0149669	-0.0450186	-0.0338449	-0.028116	-0.0241076	-0.0266654	-0.00743626	0.0460699	-0.34216	-0.236027	-0.13257	-0.165015	-0.52988	-0.11793	-0.155198	-0.624807		CAA	-0.0162309	-0.0368297	-0.0508076	-0.0444852	-0.0514737	-0.0539789	-0.0452549	-0.0808049	0.0104622	-0.0315115	-0.0590645	-0.108325	-0.158122	-0.338687	-0.113156	-0.16227	-0.286371		CAA	-0.0386591	-0.0582579	-0.0544585	-0.0309118	-0.0584122	-0.0267299	-0.0790211	-0.0401076	-0.481833	-0.623756	0.244896
CAC	-0.0243853	0.00866035	-0.0415706	-0.0550278	-0.0692575	-0.0524114	-0.00762177	-0.025649	0.320047	-0.132393	-0.0194131	0.177469	0.0685144	-0.963369	0.0609735	0.0326363	-0.114973		CAC	-0.067301	-0.0967784	-0.0237821	-0.0672664	-0.0634578	-0.0862161	-0.0363811	-0.0535944	-0.0841843	0.0507884	0.0150346	0.0268774	-0.0660498	-0.634231	-0.151582	-0.095264	-0.287726		CAC	-0.0831355	-0.0419019	-0.027998	-0.0635744	-0.0801174	-0.0603397	-0.0627714	-0.0190551	-0.240275	-0.53043	0.226003
CAG	0.0754502	0.0715205	0.0975112	0.106128	0.0811328	0.0828299	0.0425244	0.0449204	0.300734	-0.135586	-0.102172	0.132594	0.357513	-0.101163	0.0934687	0.0352017	0.31096		CAG	0.0605401	0.116728	0.142344	0.0979031	0.090179	0.0466682	0.101428	0.111982	0.139294	0.0391311	0.143216	0.157112	0.187727	0.0921312	0.117388	0.0557233	0.23268		CAG	0.1476	0.103191	0.100062	0.0886064	0.116485	0.0808383	0.101407	0.0967229	0.415103	-0.487245	0.498689
CAT	0.078065	0.0879299	0.0569782	0.0243578	0.0305913	0.0417259	0.059055	-0.0967618	0.168276	-0.287164	-0.166992	-0.00605324	0.173878	-0.862834	0.0347073	0.010776	0.0176039		CAT	0.0593352	0.028624	0.0609047	0.0402109	0.0902407	0.0934822	0.0299482	0.0164167	-0.111985	-0.0399591	0.0206468	0.0200734	0.0906586	-0.390604	-0.0385813	0.0346303	0.0795576		CAT	0.0735901	0.0844625	0.0493105	0.100105	0.0426753	0.0371248	0.0785692	0.0749442	0.200261	-0.533795	0.307263
CCA	-0.0752726	-0.0841672	-0.120736	-0.0962349	-0.0745236	-0.0939418	-0.122317	0.0260407	0.0609016	-0.296959	0.0388057	-0.0244931	0.551858	0.444337	0.119387	-0.00269304	-0.362507		CCA	-0.148864	-0.0744568	-0.118923	-0.120611	-0.108666	-0.0904605	-0.110877	-0.150538	0.6003	-0.212459	0.013014	-0.0882469	0.214896	0.151242	0.0161275	-0.0647193	-0.341595		CCA	-0.13331	-0.134078	-0.10095	-0.123678	-0.142379	-0.128706	-0.132032	-0.108282	-0.537279	-0.237641	0.6024
CCC	0.0636782	0.100098	0.0866644	0.0576099	0.0445755	0.0439009	0.0450864	0.103685	0.702783	0.354176	0.449497	0.265993	0.795818	0.254701	0.519762	0.398631	0.203645		CCC	0.17202	0.0559017	0.0738066	0.0980435	0.0641977	0.0642083	0.022644	0.104084	0.641027	0.268605	0.302274	0.196048	0.458439	0.22553	0.289912	0.280747	0.0394974		CCC	0.123647	0.122354	0.1274	0.149679	0.0986589	0.122154	0.134578	0.185158	0.145854	0.139834	0.803861
CCG	0.141381	0.200055	0.171709	0.186303	0.134191	0.152193	0.107186	0.195857	0.408811	0.120651	0.0519565	0.192856	0.580195	0.465882	0.360067	0.283208	0.259451		CCG	0.180084	0.183145	0.12766	0.166799	0.179053	0.183197	0.137718	0.186469	0.823442	0.0111642	0.175314	0.175034	0.223939	0.176394	0.234177	0.206995	0.151063		CCG	0.237661	0.207994	0.119865	0.215254	0.189813	0.144318	0.201723	0.159621	0.567801	-0.151658	0.671565
CCT	0.0564537	0.0796551	0.0470849	0.0376497	0.0355212	-0.0029878	0.00514567	-0.0596133	0.500379	0.0458858	0.186981	0.0369792	0.855774	0.046772	0.349663	0.301794	0.0874498		CCT	0.0588535	0.0870881	0.0743274	0.0394161	0.0417577	0.097212	0.0751351	0.0762161	0.595247	-0.0485572	0.209451	0.0982697	0.391681	0.0805218	0.194633	0.190901	0.074172		CCT	0.0751283	0.0621092	0.0642025	0.0164604	0.0636177	0.0361714	0.0246146	0.011737	0.26223	-0.209794	0.629189
CGA	0.296684	0.222373	0.229436	0.183087	0.176655	0.193315	0.246783	0.186576	0.415524	-0.0181147	0.229515	0.101693	-0.41993	-0.417398	0.0676019	0.123156	-0.0830566		CGA	0.162005	0.129153	0.10673	0.203828	0.109382	0.214993	0.178641	0.164736	0.360041	0.297725	0.262795	0.160971	-0.0225461	-0.0966042	0.0876765	0.245758	0.0647454		CGA	0.27623	0.39026	0.256096	0.212426	0.251945	0.227017	0.202823	0.15095	0.0766355	-0.0771359	0.297082
CGC	0.0848471	0.0714617	0.0649968	0.0631988	0.0252532	0.0815099	0.0769653	0.194358	0.556016	0.0289132	0.313713	0.204317	-0.174155	0.139835	0.237441	0.208952	0.179936		CGC	0.12667	0.121482	0.049909	0.0720772	0.111609	0.0374633	0.126863	0.126871	0.0582224	0.521001	0.131142	0.195967	0.0501837	-0.0184037	0.132123	0.107137	0.0199555		CGC	0.050395	0.162861	0.0610816	0.104405	0.243686	0.0925571	0.0695729	0.0800573	0.065609	-0.340526	0.36109
CGG	0.103106	0.252772	0.207647	0.12104	0.158053	0.203401	0.226948	0.205262	0.584648	-0.0182166	0.0509984	0.128014	0.729711	-0.568923	0.317473	0.037306	0.413778		CGG	0.0139679	0.202498	0.32449	0.311497	0.273858	0.146384	0.0582977	0.245343	0.478538	0.329577	0.168138	0.149668	0.255573	-0.0658003	0.266042	0.170018	0.197235		CGG	0.214928	0.284706	0.177771	0.223026	0.0985293	0.12828	0.27144	0.0887034	0.610834	-0.207447	0.530611
CGT	-0.00708765	-0.0232718	-0.00319806	-0.0162473	-0.0173857	-0.0584626	-0.0252111	-0.0698398	0.338368	-0.202353	0.0554744	-0.170604	-0.220204	-0.234113	0.187145	0.146033	0.0914739		CGT	-0.0578976	-0.0239004	-0.0110345	-0.0468539	-0.0295543	-0.0287118	-0.0873192	-0.0254507	0.245691	0.228284	0.195781	0.0490408	-0.136292	-0.196026	0.0483363	0.0693604	0.116322		CGT	-0.108999	-0.0244488	-0.0568463	-0.100413	-0.131936	0.00175102	-0.0237358	-0.0625732	0.245107	-0.890157	0.401845
CTA	-0.00500979	-0.00519026	-0.0179151	-0.0233268	-0.0349465	0.000356339	0.021825	0.0860619	0.102464	-0.315967	0.150152	0.0912189	-0.138444	0.039557	0.158631	-0.0297521	-0.33089		CTA	0.00107627	-0.0511321	-0.0386412	-0.00376998	0.00184346	0.0578958	0.000565905	0.0361398	-0.0876432	0.147331	0.0835899	0.0334216	-0.122332	0.00250651	0.0919009	-0.0166632	-0.0912906		CTA	0.00203549	-0.0174178	-0.0122934	0.0111433	-0.0159199	0.0527098	0.0484551	0.00175155	-0.624567	-0.173292	0.26779
CTC	0.0696613	0.0379248	0.0849225	0.0926621	0.112206	0.0628228	0.0875897	0.0561621	0.467982	0.0580458	0.440796	0.34833	-0.246668	0.0197207	0.307258	0.204708	0.186482		CTC	0.0850439	0.136131	0.16809	0.0925613	0.0468756	0.0343937	0.125185	-0.0235707	-0.0484493	0.307756	0.217616	0.198154	-0.0313366	0.0270497	0.175995	0.136411	0.071703		CTC	0.1442	0.0964068	0.13519	0.14843	0.10828	0.138002	0.0366046	0.0987357	0.0270198	-0.100621	0.3433
CTG	0.112902	0.0510907	0.0695651	0.0910076	0.0847968	0.0623028	0.0830297	0.0801706	0.349753	-0.203065	0.184949	0.344732	-0.0851462	0.048228	0.262174	0.0874686	0.26693		CTG	0.140328	0.0368931	0.115704	0.1536	0.118643	0.128992	0.114946	0.102642	0.243056	0.0911155	0.208088	0.137924	0.0433678	0.0861519	0.241907	0.059289	0.179958		CTG	0.131981	0.124975	0.129309	0.0854087	0.0681958	0.0610929	0.0974546	0.101708	0.347598	-0.521083	0.566618
CTT	0.0756983	0.0638924	0.0827209	0.094109	0.0906332	0.096943	0.0926535	0.00542742	0.270367	-0.170944	0.206494	0.122876	0.0153825	-0.164616	0.261662	0.216802	0.140621		CTT	0.089379	0.107957	0.104001	0.081642	0.0889907	0.0940551	0.0984762	0.10422	0.0877102	0.165752	0.216939	0.169776	0.0193537	-0.0386487	0.143847	0.127712	0.320021		CTT	0.0804243	0.08461	0.121216	0.0698083	0.0760382	0.153021	0.0662915	0.158475	0.174458	-0.298244	0.404275
GAA	-0.0912921	-0.0967596	-0.118341	-0.0973019	-0.0899528	-0.092651	-0.12993	-0.110622	-0.036043	-0.00842203	-0.311167	-0.162642	-0.174668	0.233846	-0.323447	-0.167862	-0.591302		GAA	-0.107815	-0.0968865	-0.120997	-0.126534	-0.123044	-0.115539	-0.123743	-0.193047	-0.518117	-0.10213	-0.300838	-0.128756	-0.0795391	0.169739	-0.18627	-0.0777089	-0.236939		GAA	-0.115367	-0.125133	-0.121635	-0.157678	-0.120212	-0.123891	-0.13578	-0.151748	-0.617682	0.2611	-0.716959
GAC	-0.0452009	-0.0672064	-0.0805002	-0.0871326	-0.0840647	-0.0757132	-0.117052	-0.10726	0.124138	0.0153383	-0.0400873	0.0721582	0.142541	0.0704387	-0.182271	-0.0747705	-0.0132703		GAC	-0.0494073	-0.0916416	-0.110883	-0.116679	-0.122435	-0.0762865	-0.0961483	-0.1507	-0.90074	0.0025556	-0.253453	-0.0369071	0.0335809	-0.00773385	-0.238779	-0.137902	-0.199223		GAC	-0.0908275	-0.0982117	-0.0799885	-0.138106	-0.0892487	-0.133573	-0.108182	-0.116502	-0.319048	0.212253	-0.757933
GAG	-0.0253191	-0.00709655	-0.0154186	-0.0262691	-0.0118451	-0.0441609	-0.0685024	-0.0440907	0.215731	0.216465	-0.169213	0.102395	0.170942	0.432866	-0.0971199	-0.0268066	0.296193		GAG	0.00365118	0.018059	0.0102785	0.0155265	0.00698366	-0.0128596	0.0321448	0.0455457	-0.381666	-0.0386276	-0.0440422	0.0759852	0.164753	0.341203	0.0475414	0.0442156	0.195552		GAG	-0.011341	-0.0259366	-0.015608	0.0122807	0.00735862	-0.000312557	0.0198706	-0.0283955	0.34505	0.210837	-0.314905
GAT	-0.0130453	-0.0145577	-0.0354053	-0.0238834	-0.0189814	-0.0506393	-0.0635312	-0.203346	0.0581742	-0.107309	-0.166806	-0.0961452	0.167592	-0.115602	-0.204793	-0.0319506	0.0757227		GAT	-0.010621	-0.0154381	-0.0434806	-0.0145745	0.00415323	-0.0259577	-0.0430164	-0.0498764	-0.7957	-0.173012	-0.168661	-0.074151	0.104313	-0.0316896	-0.11998	-0.0240468	0.121098		GAT	-0.00273562	-0.0539841	-0.0305543	-0.0418194	-0.036723	-0.0410686	-0.033243	-0.0574785	0.11254	0.1405	-0.581377
GCA	0.0351902	0.0304185	0.0281022	0.0223089	-0.0129004	-0.000115197	-0.00616812	0.0789791	-0.261535	0.219605	0.0753315	0.131454	-0.337431	0.152446	-0.254076	-0.0415535	-0.38838		GCA	0.0381263	0.0488106	0.0359666	0.0242393	-0.00360401	0.027117	0.0100332	0.00792312	0.390736	-0.0681789	-0.145211	0.00158268	-0.12814	0.00713532	-0.123185	-0.0520443	-0.249677		GCA	0.0374815	0.0379404	0.0180689	0.00877611	0.038341	0.0279886	-0.0119389	0.0505442	-0.441136	0.711087	-0.321248
GCC	-0.0957407	-0.0785759	-0.094784	-0.0615999	-0.0842128	-0.0997352	-0.0814433	-0.0256131	0.175753	0.352601	0.222436	0.0786243	0.00443729	0.196775	-0.177732	0.0197085	-0.0914375		GCC	-0.110443	-0.110839	-0.14084	-0.0889413	-0.0924586	-0.115159	-0.0995578	-0.0772479	0.211477	0.147622	-0.13995	-0.0267706	0.0100719	0.0434948	-0.134534	-0.0249031	-0.293187		GCC	-0.1589	-0.122908	-0.128054	-0.176249	-0.139169	-0.109035	-0.114004	-0.0629045	-0.159026	0.645527	-0.643515
GCG	0.0346755	0.084509	0.0438378	0.0686731	0.0497502	0.0500048	0.0579533	0.107273	0.107159	0.425273	0.123385	0.281727	-0.494817	-0.136458	-0.0567906	0.122502	0.283595		GCG	0.10023	0.0918691	0.078926	-0.0078267	0.126735	0.0467255	0.0559904	0.116966	0.505042	0.0521325	-0.0193532	0.175231	-0.113239	-0.0179564	-0.0557085	0.10623	0.167213		GCG	0.0828666	0.0898364	0.0897092	0.094453	0.0382111	0.118864	0.0657107	0.0820466	0.441678	0.633703	-0.0996119
GCT	-0.114678	-0.141935	-0.140902	-0.113757	-0.124882	-0.112655	-0.132066	-0.248599	-0.0735528	0.231267	0.0862511	-0.0598817	0.0298414	-0.0643618	-0.210275	0.0370091	-0.0426589		GCT	-0.173231	-0.132458	-0.126947	-0.12711	-0.148148	-0.149307	-0.153578	-0.125168	0.159766	-0.242165	-0.135828	-0.105371	-0.0347598	-0.179614	-0.212224	-0.0605637	-0.0893397		GCT	-0.183605	-0.190144	-0.203431	-0.196977	-0.14196	-0.166247	-0.195697	-0.207042	0.166608	0.686026	-0.601485
GGA	-0.00508692	0.0292408	0.0470589	0.0365845	0.0353578	0.0701827	0.0619515	0.0990166	0.278085	0.126618	0.00318826	0.0875101	0.244546	0.208763	-0.0893889	-0.00533708	-0.269666		GGA	0.0525272	0.09121	0.0567804	0.0326665	0.0238845	0.0863987	0.0647276	-0.0189136	0.0829319	0.145085	0.102617	0.10956	0.235885	0.244884	-0.0039827	0.131053	-0.0607809		GGA	0.112696	0.0845035	0.0487537	0.0284016	0.0368199	0.0244092	0.0463194	0.0406731	-0.331664	0.414587	-0.388856
GGC	-0.0189542	-0.0134483	-0.0310065	-0.0535484	-0.0305556	-0.0413673	-0.0161814	0.108336	0.339314	0.180705	0.156064	0.131513	0.182194	0.386349	-0.0221375	0.0494321	0.0616249		GGC	-0.0446185	-0.0142313	0.0221561	-0.0166032	0.0163241	-0.0245545	-0.0247282	0.0317879	-0.310001	0.311351	0.0433389	0.0768802	0.0944202	0.266527	0.00272484	0.0857627	0.0081888		GGC	-0.00181426	-0.0174988	-0.0274686	-0.0127103	0.00815559	-0.0562011	-0.0237599	-0.00401601	0.00744396	0.261664	-0.499169
GGG	0.0620377	0.0627234	0.0270214	0.0737099	0.0581679	0.0643652	0.077445	0.0543523	0.401993	0.384316	0.102126	0.336813	0.193929	0.618052	0.180342	0.161347	0.339076		GGG	0.0900184	0.0774258	0.0390916	0.079009	0.121102	0.0775664	0.0705741	0.069758	0.328855	0.276011	0.245297	0.2109	0.316155	0.501774	0.231793	0.161563	0.295837		GGG	0.045557	0.112219	0.112021	0.0839523	0.0619357	0.0669866	0.0224242	0.108661	0.473069	0.522463	-0.157756
GGT	-0.132586	-0.143661	-0.110224	-0.151589	-0.129749	-0.13979	-0.12527	-0.217863	0.142209	-0.0297431	-0.148704	-0.184982	0.135967	0.0255248	-0.213627	-0.0601857	0.00021645		GGT	-0.128348	-0.142141	-0.131043	-0.111146	-0.154537	-0.140383	-0.119368	-0.150767	-0.230335	-0.0120068	-0.0988193	-0.0613872	0.0710747	0.0176621	-0.146944	-0.0516507	-0.0256363		GGT	-0.181051	-0.185488	-0.195182	-0.167482	-0.227332	-0.175695	-0.21108	-0.215333	0.165264	0.130956	-0.814919
GTA	0.0871044	0.0216148	0.0460955	0.0206158	0.0575101	0.0654371	0.0144073	0.147787	-0.0573907	-0.0178722	0.0306619	-0.151801	-0.314248	0.155111	-0.214174	-0.000191017	-0.17631		GTA	0.10048	0.0428556	0.0856892	0.0113721	0.0470626	0.0705273	0.00283827	0.0147558	-0.122478	-0.01666	-0.0794287	-0.0119637	-0.127669	0.024684	-0.0246355	-0.00820922	0.00741792		GTA	0.0553192	0.0861772	0.0860235	0.103585	0.0669677	0.0756158	0.112622	0.0800625	-0.496395	0.245727	-0.276658
GTC	-0.123836	-0.11668	-0.14208	-0.151633	-0.123769	-0.111004	-0.0837365	-0.100068	0.0547079	0.016893	0.138151	-0.159857	-0.499711	-0.00321109	-0.177419	-0.0534579	-0.0617236		GTC	-0.123824	-0.174299	-0.190123	-0.214372	-0.12415	-0.162055	-0.0910866	-0.158118	-0.420239	-0.0141454	-0.178404	-0.144217	-0.30416	-0.083495	-0.192677	-0.109967	-0.205839		GTC	-0.191634	-0.184936	-0.202607	-0.199566	-0.196126	-0.161192	-0.187014	-0.120105	-0.498937	0.0228701	-0.689994
GTG	0.0531523	0.0391447	0.0110179	0.00532113	0.0294804	0.0441732	0.0450938	0.0895382	0.191081	0.093318	0.0107996	-0.126878	-0.0416919	-0.0304897	-0.14935	-0.00319364	0.291491		GTG	0.0682049	0.0802539	0.0698306	0.047569	0.00393122	0.0492451	0.119542	0.0550462	0.074551	0.0215388	0.0306496	-0.0633444	-0.00588642	0.0445461	-0.0549647	0.0244399	0.253678		GTG	0.0233616	0.0386064	0.0411051	0.0598574	0.0333554	0.0741786	0.0604256	0.0942647	0.399313	-0.0379	-0.119587
GTT	-0.0890771	-0.0936647	-0.0605115	-0.0757426	-0.0853629	-0.0815508	-0.0724978	-0.185233	-0.0160822	-0.0815894	-0.0134038	-0.311394	-0.43608	-0.101988	-0.238234	0.0214079	0.138416		GTT	-0.0916587	-0.0948078	-0.0990117	-0.114821	-0.114671	-0.08908	-0.113215	-0.101931	-0.237131	-0.0929293	-0.141941	-0.16168	-0.33931	-0.160299	-0.202331	-0.016668	0.129382		GTT	-0.147762	-0.126473	-0.104305	-0.10828	-0.105578	-0.0993053	-0.158669	-0.128344	0.00395863	-0.00514325	-0.47095
TAC	-0.0980584	-0.102439	-0.085929	-0.0674161	-0.0792429	-0.0860117	-0.0623437	-0.0424595	-0.070711	-0.111097	-0.157438	-0.21733	-0.293336	0.298188	-0.0837776	-0.183575	-0.0717223		TAC	-0.101675	-0.158608	-0.0876459	-0.110542	-0.135582	-0.115176	-0.10932	-0.1071	-0.731632	-0.100015	-0.206155	-0.144514	-0.337685	0.0951769	-0.107869	-0.212127	-0.210273		TAC	-0.127477	-0.146472	-0.100082	-0.0845711	-0.119135	-0.127722	-0.111973	-0.0943259	-0.299758	-0.344008	-0.265268
TAT	-0.00345255	-0.011888	-0.00162045	0.0308856	0.0135616	0.0310615	0.0369316	-0.0775439	-0.176547	-0.151555	-0.201628	-0.329059	-0.179519	0.187934	-0.060641	-0.0373101	0.104141		TAT	0.0132076	0.0446119	0.0946966	0.055798	0.0926292	0.0713039	0.0583305	0.0696112	-0.628852	-0.140391	-0.0432645	-0.055314	-0.122686	0.121649	-0.00631851	-0.0080951	0.21485		TAT	0.0300931	0.0106264	0.0387322	0.0651062	0.0740477	0.039222	0.0665683	0.0580007	0.224344	-0.100929	-0.0663439
TCA	0.0524154	0.0611314	0.0375312	0.0490157	0.0426996	0.0385341	0.03411	0.126384	-0.35239	0.0295947	0.019454	0.0815684	0.0191424	0.136066	0.0506853	0.0189355	-0.189814		TCA	0.0619046	0.0832546	0.0413183	0.0593786	0.040982	0.0591322	0.0618898	0.0186928	0.326999	-0.118677	0.0248883	0.00728012	0.0268561	0.0119645	0.047164	0.0123676	-0.0221736		TCA	0.0862595	0.0862655	0.0958062	0.0945101	0.0663092	0.109043	0.107486	0.101641	-0.438265	0.330157	0.183417
TCC	-0.0842402	-0.0738832	-0.0825977	-0.0309535	-0.0477212	-0.015486	-0.0390915	-0.0771513	0.202637	0.336399	0.264224	0.200943	0.346686	0.408658	0.277665	0.185394	0.0417934		TCC	-0.102438	-0.0882856	-0.0776388	-0.042248	-0.068239	-0.0701593	-0.0685253	-0.0745071	0.311104	0.0472741	0.0823612	0.0828021	0.214988	0.254126	0.158009	0.0791961	-0.177889		TCC	-0.147334	-0.11559	-0.0880598	-0.0939461	-0.105322	-0.0479109	-0.0527838	-0.0762734	-0.19352	0.0667601	0.196811
TCG	0.102238	0.0805971	0.106062	0.0984181	0.118623	0.111479	0.103847	0.139377	-0.0122323	0.151607	0.0179697	0.252566	0.125843	0.198262	0.21088	0.12478	0.266873		TCG	0.118643	0.118771	0.09746	0.0611737	0.104118	0.151163	0.13207	0.176097	0.495907	-0.000183426	0.0791396	0.167809	0.116313	0.114204	0.11934	0.113518	0.125958		TCG	0.166195	0.130912	0.159079	0.121689	0.127159	0.104745	0.184036	0.129622	0.358281	0.308719	0.370763
TCT	-0.0482691	-0.0587492	-0.0284738	-0.0384917	-0.0286626	0.0044094	-0.0309193	-0.185777	-0.0822906	0.102002	0.0278225	0.0131108	0.277329	0.0666912	0.146559	0.136421	0.0359053		TCT	-0.0389852	-0.0504469	-0.0650678	-0.0590187	-0.0552685	-0.0497608	-0.0653115	-0.0274004	0.244349	-0.275077	0.00742069	-0.00847143	0.127128	-0.0441243	0.0395739	0.0548854	-0.0374414		TCT	-0.0924756	-0.0719838	-0.0699947	-0.0666867	-0.0325728	-0.0297318	-0.054842	-0.0608238	0.155275	0.117424	0.110058
TGC	-0.0203841	-0.00965559	0.00233232	0.032558	0.0744323	0.0123087	0.00637491	0.0865306	0.11726	0.11619	0.0562662	-0.165484	0.121645	-0.0451963	0.106704	-0.00600829	-0.0833801		TGC	0.0452927	0.0696717	0.0578031	0.0892444	-0.035886	0.0169811	0.0445406	0.050022	-0.326676	0.159154	0.0675787	-0.0404073	0.0352721	-0.0434755	0.0778079	-0.0884065	-0.165145		TGC	0.0207201	0.106049	-0.0190498	0.0506543	0.0176471	0.0479275	-0.0184525	0.0775721	0.0501929	-0.04041	0.0430968
TGG	0.0062258	-0.00268528	0.0145357	0.0103653	-0.01911	-0.00662064	-0.0318515	0.0209598	0.0509668	-0.159268	-0.250503	-0.107614	-0.415264	-0.425197	0.0235563	-0.119661	0.130182		TGG	-0.0030177	0.0678333	0.00894856	-0.037427	-0.0522303	0.00450451	-0.0161816	0.0123226	0.0380473	0.0518536	-0.0930472	-0.0275626	-0.150021	-0.191093	-0.00203197	-0.0702178	0.0740767		TGG	0.0191418	-0.0328565	-0.0146994	0.00401263	-0.0273822	-0.0673494	-0.0177562	-0.082127	0.454968	-0.0737042	0.280288
TGT	-0.0810645	-0.0660237	-0.0804004	-0.0453274	-0.0160951	-0.0699115	-0.0756231	-0.103429	-0.134806	-0.0969622	-0.195113	-0.442347	0.183299	-0.524014	-0.0736076	-0.057647	0.0396813		TGT	-0.0887939	-0.10046	-0.070282	-0.0705609	-0.0415823	-0.0687428	-0.0805334	-0.0424368	-0.226784	-0.048873	-0.0462713	-0.132907	-0.029635	-0.25945	0.00411254	-0.0840902	0.0956566		TGT	-0.0370291	-0.0940883	-0.0869437	-0.0678168	-0.0292006	0.00782711	-0.0560647	-0.0161904	0.187081	-0.175426	-0.0480893
TTA	-0.0349166	-0.0496841	-0.0278808	-0.00891083	-0.0208105	-0.0183363	-0.00603457	0.0917554	-0.526982	-0.134725	-0.0750297	-0.101723	-0.185184	-0.0644142	-0.0924938	-0.102252	-0.0634976		TTA	-0.0231449	-0.0206163	-0.0279682	-0.00740763	0.0207564	0.0111857	0.0223893	0.00944378	-0.345586	-0.0439171	-0.0822132	-0.121885	-0.109972	-0.102191	-0.00769306	-0.0180053	0.133876		TTA	-0.0188319	-0.0217774	-0.0270255	0.0163898	-0.0076015	0.0227357	0.0127003	0.0425348	-0.638359	0.119307	-0.131621
TTC	-0.081004	-0.0786087	-0.0507507	-0.0824627	-0.0728874	-0.0571543	-0.0296629	-0.0403627	-0.290263	-0.00831463	-0.00906336	-0.105338	-0.122185	0.0776347	0.0912324	-0.0389813	-0.014974		TTC	-0.10309	-0.10187	-0.0937171	-0.11278	-0.0931659	-0.0817445	-0.0938545	-0.114983	-0.428901	0.060062	-0.145359	-0.0886163	-0.127721	-0.00732202	0.0249211	-0.0705268	-0.12012		TTC	-0.12933	-0.114041	-0.0988119	-0.0982306	-0.0972521	-0.127722	-0.0750679	-0.0960488	-0.376419	0.195207	-0.264511
TTG	-0.113169	-0.153404	-0.0912446	-0.0831407	-0.0766246	-0.0991952	-0.107059	-0.0998259	-0.45454	-0.204107	-0.164242	-0.0708413	-0.135636	0.00815271	-0.0812746	-0.16873	0.157879		TTG	-0.128435	-0.146388	-0.111358	-0.116926	-0.0995321	-0.0956893	-0.0897063	-0.0711595	-0.158099	-0.289404	-0.124635	-0.181616	-0.193741	-0.070741	-0.0928367	-0.202002	0.0348468		TTG	-0.1541	-0.136931	-0.172197	-0.152699	-0.102337	-0.133844	-0.149657	-0.159708	0.207177	-0.133114	0.0161273
TTT	0.0225498	0.0135678	0.0280008	0.033504	0.0263094	0.0340246	0.0496271	-0.0433814	-0.444798	-0.135268	-0.131342	-0.332023	-0.155132	-0.158003	0.0486944	0.07244	0.268899		TTT	0.0212165	0.0403578	0.00895315	0.0144895	0.0222729	0.0494797	0.0482384	0.0578404	-0.176976	-0.05032	-0.0565269	-0.0975282	-0.0892908	-0.0962832	0.0401636	0.0783934	0.396311		TTT	0.0401877	0.0248703	0.055836	0.0485985	0.0423219	0.047945	0.0682847	0.0260263	0.179096	0.141976	-0.144305
[truncated: 60 more columns]

## Sheet: Supplemental_Figure_S10
INGOLIA RICH DATA FIRST FRAME																			INGOLIA RICH DATA SECOND FRAME																			INGOLIA RICH DATA THIRD FRAME
CODON	POS-8	POS-7	POS-6	POS-5	POS-4	POS-3	POS-2	POS-1	POS0	POS1	POS2	POS3	POS4	POS5	POS6	POS7	POS8		CODON	POS-8	POS-7	POS-6	POS-5	POS-4	POS-3	POS-2	POS-1	POS0	POS1	POS2	POS3	POS4	POS5	POS6	POS7	POS8		CODON	POS-8	POS-7	POS-6	POS-5	POS-4	POS-3	POS-2	POS-1	POS0	POS1	POS2
AAA	0.0869248	0.0232672	0.0330479	0.0642261	0.0618771	0.104814	0.0551361	0.090425	0.109206	0.0736126	0.0885766	0.179438	0.252507	0.353488	0.0483044	0.132159	0.0765787		AAA	0.0682155	0.0568048	0.0868861	0.0012846	0.0408665	0.0425355	0.0480128	0.0407611	0.204654	0.224005	0.173362	0.104151	0.200279	0.21291	0.235337	0.117891	0.129705		AAA	-0.0112545	0.0416143	0.000859837	0.0212004	0.0391778	0.0356021	0.0389607	0.0602635	0.30219	0.164773	0.18371
AAC	-0.142564	-0.147024	-0.181941	-0.165295	-0.182726	-0.165568	-0.142614	-0.00270267	0.46713	-0.0974116	-0.113756	-0.0988317	0.164516	-0.0408669	-0.144892	-0.152815	-0.143177		AAC	-0.0605143	-0.118971	-0.132131	-0.124009	-0.139122	-0.119009	-0.0969722	-0.066834	-0.525485	-0.14049	-0.00508021	-0.0884858	0.03133	-0.0799816	-0.0760709	-0.125264	-0.0784397		AAC	-0.108231	-0.0768328	-0.0749357	-0.148069	-0.079935	-0.148212	-0.106092	-0.0742871	0.163423	-0.107319	-0.0858327
AAG	-0.196407	-0.167743	-0.200256	-0.209457	-0.219919	-0.177104	-0.241087	-0.35198	0.575158	-0.250822	-0.14608	0.0740868	0.0403815	0.146757	-0.0867051	-0.0844059	0.0642735		AAG	-0.133253	-0.0867426	-0.136461	-0.0951513	-0.113041	-0.0685903	-0.105806	-0.113618	-0.224679	-0.100636	0.223009	-0.0139046	0.128311	0.10445	0.047826	0.0341931	0.0379961		AAG	-0.168317	-0.111664	-0.165251	-0.152645	-0.152022	-0.0977693	-0.132243	-0.173713	-1.02589	-0.101446	0.155841
AAT	0.0409802	0.0489081	0.0794141	0.0601526	0.0393357	0.0849472	0.0829831	0.0539584	0.425904	0.0326181	0.202558	0.16925	0.372453	0.167607	0.138845	0.0653071	0.145285		AAT	0.0354783	0.041039	0.0804236	0.00492795	0.112026	0.0749118	0.120927	0.102243	-0.0494177	0.0508897	0.132118	0.104538	0.177382	0.14328	0.00633811	0.0853442	0.170489		AAT	0.0518022	0.052399	0.041689	0.0847084	-0.00925353	0.0634057	0.0974613	0.0554094	0.0626157	0.243278	0.152174
ACA	0.0972683	0.114283	0.140671	0.10344	0.124087	0.124064	0.141729	0.141435	0.208815	0.0476125	0.141023	0.130074	0.186767	-0.0138109	0.0419493	0.0393806	0.0825078		ACA	0.0430349	0.00503484	-0.0213717	0.0756871	-0.00725236	0.0886969	-0.0411082	-0.0296424	0.220738	0.144682	0.113686	0.0861661	0.0715817	0.000107797	-0.0267235	0.0839993	-0.0262314		ACA	0.0604425	0.0760307	0.054408	0.104302	0.0356095	0.071516	0.156005	0.0730778	0.155453	0.1506	0.130031
ACC	-0.30704	-0.190875	-0.170695	-0.227149	-0.264132	-0.214657	-0.162573	0.0334792	0.213867	-0.322112	-0.240735	-0.211947	-0.194168	-0.424113	-0.246102	-0.224237	-0.156429		ACC	-0.131984	-0.166691	-0.154035	-0.102366	-0.138344	-0.16264	-0.11499	-0.159905	-0.223166	-0.0741534	-0.319751	-0.153269	-0.187884	-0.253017	-0.255157	-0.0257394	-0.278012		ACC	-0.160911	-0.197708	-0.165499	-0.106043	-0.151882	-0.17544	-0.218811	-0.117038	0.121701	-0.0163337	-0.205603
ACG	0.0906269	0.217801	0.0777724	0.102501	0.170067	0.074917	0.171614	-0.00713922	0.374239	0.146341	0.111054	0.108758	0.270534	0.132146	0.0400013	0.0713375	0.0876112		ACG	0.14368	0.124689	0.0504391	0.104155	0.00246338	0.107847	-0.00749185	0.132284	0.304467	0.165438	-0.00527778	0.0303842	0.177271	0.186004	0.0954575	0.166015	0.168226		ACG	0.157423	0.0735783	0.142125	0.103572	0.0236707	0.16247	0.114254	0.112826	-0.114541	0.32707	0.207424
ACT	-0.118076	-0.113381	-0.073256	-0.141017	-0.129015	-0.0865405	-0.193115	-0.228444	0.137917	-0.218267	-0.130239	-0.189779	-0.0855457	-0.448484	-0.237183	-0.225485	-0.190777		ACT	-0.0719971	-0.070136	-0.0358448	-0.115211	-0.0309077	-0.0514013	-0.146087	0.0186647	-0.0951968	0.285211	-0.305944	-0.190068	-0.184321	-0.224516	-0.286611	-0.17255	-0.206861		ACT	-0.0777697	-0.0199582	-0.0949449	-0.107787	-0.10487	-0.0931018	-0.120883	-0.0818965	-0.175789	0.057709	-0.0421478
AGA	-0.127629	-0.187659	-0.175293	-0.200889	-0.161402	-0.0673078	-0.0942782	0.112713	0.513114	-0.0944811	-0.00867243	-0.0620286	-0.126459	0.193807	-0.0158673	0.00877455	-0.0472008		AGA	-0.049451	-0.11754	-0.0496417	-0.100619	-0.135588	-0.0741234	0.00102636	-0.0535657	-1.06551	0.172898	0.00760293	-0.0489436	0.107866	0.0356901	0.0520251	0.0344144	0.0279418		AGA	-0.180855	-0.171118	-0.102906	-0.1144	-0.0929778	-0.0672655	-0.115318	-0.0924981	0.119228	-0.04091	0.0960957
AGC	0.0377403	0.0481768	0.043105	0.071873	0.0917691	0.0969161	0.0318067	0.171407	0.456834	-0.0774556	0.0606155	0.0449494	-0.179796	0.168683	0.0518926	0.120265	0.124986		AGC	0.0722146	0.0748405	0.0919351	0.134279	-0.00996457	-0.0263051	-0.058799	-0.15085	-0.773753	0.0390665	0.130416	0.0289056	-0.0144624	0.142568	0.0981566	-0.0143728	0.0809451		AGC	0.0763314	0.0240518	0.0866506	0.0300448	0.000335056	0.123594	0.0283189	0.107227	0.221493	0.00530015	0.0436877
AGG	0.166474	0.0911273	0.075137	0.132278	0.105859	0.158181	0.136404	-0.00946043	0.440351	0.108192	0.170914	0.19974	0.0613084	0.3333	0.237676	0.251402	0.219211		AGG	0.0390162	0.114273	0.0479413	0.192896	0.177569	0.0431697	0.0734153	-0.0181579	-0.206972	0.183561	0.144412	0.24605	0.056135	0.285065	0.124431	0.0987269	0.229787		AGG	0.166892	0.116736	0.11233	0.139536	0.161581	0.0653066	0.0869399	0.1181	-0.158293	0.177515	0.287512
AGT	0.180195	0.152979	0.160132	0.149032	0.0764259	0.117314	0.0634214	0.0365202	0.402951	-0.00453055	0.125916	0.0910616	0.0820356	0.217015	0.232262	0.13928	0.143274		AGT	0.0662021	0.0162058	0.161031	0.0802644	0.0569085	0.0978086	0.0462495	0.0624608	-0.331898	0.475847	0.125857	0.0155832	0.107159	0.0889044	0.203537	0.141681	0.0282158		AGT	-0.0138241	0.0521134	0.132838	0.126931	0.0847485	0.0523203	0.0124807	-0.0161592	0.0538846	-0.0099144	0.176638
ATA	0.109174	0.109995	0.166546	0.141652	0.171662	0.165562	0.0727577	0.2652	0.290215	0.136958	0.238113	0.26207	-0.0116174	0.332789	0.171557	0.143434	0.114498		ATA	0.10952	0.0350239	0.138031	0.0476549	0.0260439	0.0881987	0.0163158	0.0392787	0.305007	0.0109522	0.13182	0.137802	0.20538	0.100071	0.197097	0.0533992	0.127584		ATA	0.11663	0.0868136	0.14524	0.113669	0.167064	0.0416732	0.0673547	0.19172	0.246695	0.206057	0.192501
ATC	-0.155719	-0.123773	-0.114735	-0.13764	-0.13862	-0.173275	-0.116786	0.101095	0.254203	-0.181583	-0.0930953	-0.24889	-0.248655	-0.115162	-0.147667	-0.163437	-0.109468		ATC	-0.0965826	-0.063744	-0.0491777	-0.09312	-0.0922397	-0.155852	-0.129032	-0.0987891	0.089845	-0.107143	-0.20277	-0.124146	-0.215818	-0.110759	-0.0760181	-0.0985418	-0.138444		ATC	-0.120536	-0.144175	-0.113711	-0.135541	-0.0963634	-0.147324	-0.150433	-0.148905	0.0666858	0.151499	-0.169807
ATG	-0.0584679	-0.0258059	0.0109318	-0.0766729	-0.0312853	0.00907262	-0.00663369	-0.138024	0.427791	-0.124531	0.0237764	0.138228	-0.13434	0.0469023	-0.0281999	0.0570467	0.0150472		ATG	-0.0551588	-0.0582535	-0.0407963	-0.0170707	-0.0114629	0.0205874	-0.0148663	-0.0388767	0.292244	0.0148774	0.170469	0.02537	-0.0349242	-0.0388385	0.013666	-0.0125642	0.0237		ATG	-0.0618749	-0.0690391	-0.0162306	-0.087928	-0.0185151	-0.00532234	0.0305227	-0.0546961	-0.619692	-0.103694	0.157738
ATT	-0.0959274	-0.05142	0.00271656	-0.0705863	-0.0646461	-0.0878058	-0.0482089	-0.131754	0.201507	-0.168459	0.0582881	-0.106451	-0.0371179	0.101553	-0.0469488	-0.00886637	0.0314266		ATT	-0.079666	-0.0533247	-0.00830294	-0.0220201	0.0291488	-0.0687477	-0.0377622	-0.00755928	0.484483	-0.101342	0.0114733	-0.038771	-0.0494335	0.00710651	0.0207556	-0.0642522	0.0179916		ATT	-0.0780926	-0.0738596	-0.0667944	-0.0626652	-0.105823	-0.0899385	-0.0167849	-0.010833	-0.0852315	-0.0342859	-0.0051707
CAA	-0.124403	-0.0813223	-0.0921527	-0.120309	-0.131291	-0.0344013	-0.0922261	-0.0454653	0.714499	-0.191705	-0.144722	0.0519445	-0.0809066	-0.427618	-0.00882894	-0.0525291	-0.0825767		CAA	-0.0835091	-0.0810189	-0.133501	-0.0397639	-0.0930499	-0.0194632	-0.0963988	-0.123099	0.432318	-0.139903	0.0633162	-0.0376872	-0.0660469	-0.232708	-0.12556	-0.059649	0.0295599		CAA	-0.0845139	-0.0954137	-0.111988	-0.129476	-0.0742054	-0.0828693	-0.0741809	-0.117295	0.323675	-0.379444	0.0514028
CAC	-0.178281	-0.152373	-0.105274	-0.149033	-0.137545	-0.0956887	-0.259276	-0.0530761	0.867276	-0.273992	-0.378828	-0.193349	-0.0931518	-1.00237	-0.210333	-0.119147	-0.324993		CAC	-0.0262408	-0.0256289	-0.131298	-0.0947016	-0.0031044	-0.0998046	-0.156839	-0.094554	0.0247603	-0.499167	-0.230851	-0.05188	-0.129677	-0.438662	-0.390332	-0.26115	-0.273215		CAC	-0.158108	-0.0795148	-0.0521938	-0.0618399	-0.199723	-0.0798933	-0.134872	-0.156959	0.150678	-0.419366	-0.20659
CAG	0.167578	0.174062	0.1324	0.160388	0.110586	0.112014	0.121107	0.0363398	0.509892	-0.0181976	0.0689719	0.234209	0.2447	0.00819362	0.157217	0.161624	0.117205		CAG	0.0869698	0.163809	0.146257	0.102086	0.122454	0.0511153	0.164776	0.155044	0.238329	-0.012812	0.229842	0.0797237	0.198121	0.0981176	0.0577599	0.0171673	0.129869		CAG	0.139224	0.103687	0.242626	0.15443	0.0635389	0.104374	0.107987	0.169461	-0.240961	-0.0311862	0.167807
CAT	0.00123689	0.073426	0.0406556	0.0160085	0.0557875	0.0612491	-0.0163335	-0.053689	0.54804	-0.0999308	-0.0766666	0.0344353	0.216391	-0.435518	0.0241891	0.0429794	-0.102523		CAT	0.0788722	0.00716053	0.0542813	0.10863	0.114693	-0.00662743	-0.0460601	0.0746013	0.130837	-0.0805431	-0.0142128	-0.10175	-0.0154772	-0.128625	-0.111752	-0.107112	-0.109075		CAT	-0.0382491	0.0568477	0.0204097	0.00560344	0.0935592	0.0732104	0.0894589	0.0703632	-0.00916561	-0.196917	-0.0491201
CCA	-0.235287	-0.1517	-0.189689	-0.218663	-0.212031	-0.164516	-0.176023	-0.0911465	0.456411	-0.477095	-0.402217	-0.277717	-0.0221507	-0.133297	-0.171356	-0.207764	-0.286451		CCA	-0.115514	-0.110915	-0.150856	-0.130964	-0.0973701	-0.0481366	-0.216523	-0.167707	0.312616	-0.201469	-0.211688	-0.17767	-0.0819987	0.011536	-0.150432	-0.0882004	-0.169844		CCA	-0.107978	-0.134965	-0.0929631	-0.177703	-0.174613	-0.127626	-0.161698	-0.16149	0.140005	-0.343147	-0.139086
CCC	0.141419	0.120781	0.131377	0.0920125	0.187548	0.171668	0.132465	0.21055	0.515239	-0.139962	0.0720014	-0.0896387	0.0843641	-0.0358188	0.067913	0.128054	0.0134646		CCC	0.202263	0.14646	0.141057	-0.0393649	0.0191423	-0.0499993	0.0925933	0.0265872	0.386705	0.150136	-0.000570836	0.0857772	0.124199	0.110748	-0.00960375	-0.0360386	0.163531		CCC	0.122746	0.127116	-0.0117423	0.0722543	0.0910706	0.0793504	0.00859272	0.0438721	0.204321	0.0160202	0.0921174
CCG	0.19427	0.223603	0.088338	0.285731	0.267881	0.288932	0.046919	0.0405935	0.380667	0.164463	-0.129223	-0.0335447	0.267022	0.212335	0.08207	0.138315	0.293891		CCG	0.198104	-0.0908045	0.25073	-0.00503173	0.159461	0.0701142	0.0461911	-0.00355019	0.239761	-0.0315821	0.179348	0.137379	-0.00184967	-0.0690847	0.268491	0.205123	-0.117013		CCG	0.164728	0.175745	0.100507	0.0665019	0.22632	0.160882	0.133789	0.294734	0.118714	0.00494549	0.125185
CCT	0.0356473	0.0747147	0.0291391	0.0197388	-0.00597161	0.0115268	0.0319661	0.0137817	0.355973	-0.172193	-0.184691	-0.049701	0.237218	-0.136997	-0.100983	-0.00447613	-0.0328116		CCT	0.159386	0.0114061	0.0608196	0.0363463	0.0913664	0.0343677	0.0380184	0.00497042	0.147124	0.0709061	-0.0695341	-0.163838	0.0046721	0.0678339	-0.184093	-0.0407392	-0.0513326		CCT	0.0154953	0.0767948	-0.0609683	0.0446268	0.069594	0.0208363	0.0391549	-0.0169422	-0.173545	-0.215135	0.00503018
CGA	0.324758	0.320592	0.143887	0.125976	0.291766	0.264703	0.384802	0.31716	0.330372	0.40116	0.14862	0.208308	-0.00605765	0.258773	0.174427	0.10011	0.197073		CGA	0.0938033	0.125453	0.178947	-0.0588558	-0.245098	-0.00150065	0.438907	0.0585408	-0.202666	0.179024	0.277993	0.131741	0.317428	-0.126917	0.14122	0.42605	0.187992		CGA	0.247649	0.258556	0.178875	0.21716	0.201549	0.244263	0.115833	0.26963	0.43366	0.0579228	0.111911
CGC	0.268239	0.103796	0.202584	-0.053923	-0.0436832	0.129916	0.228733	0.0967959	0.415799	0.0803315	0.236549	0.0389638	0.0166603	0.0486387	0.220956	-0.0744017	0.123111		CGC	0.15006	0.360137	0.02866	-0.0503277	0.0979952	0.275505	0.110702	0.146035	-0.483218	-0.0523661	0.0226712	0.0928615	0.139805	-0.0927584	0.237368	-0.277149	0.264833		CGC	0.227152	0.106406	0.274917	0.10188	0.0143148	-0.177493	0.136777	0.204453	0.489376	-0.0908113	0.110187
CGG	0.137174	0.0971814	0.294334	0.27111	0.271789	0.0977112	0.253367	-0.126779	0.508432	-0.119262	0.31705	-0.107616	0.396315	0.0607156	0.119708	0.187095	0.356692		CGG	-0.322403	-0.268708	-0.234863	0.159781	-0.0713484	-0.166478	0.496344	0.276551	0.175369	0.222604	0.143671	0.148492	0.358448	-0.112335	0.361606	0.222402	0.46956		CGG	0.382471	0.321585	0.165157	0.2447	0.339565	0.359495	0.32966	0.264301	0.142012	0.247351	0.316896
CGT	-0.0187767	0.0385245	-0.0515356	0.0888704	0.0243898	-0.0768504	-0.1936	-0.128966	0.729105	-0.226792	-0.139171	-0.23379	-0.164366	-0.382914	-0.129147	-0.132965	-0.137196		CGT	-0.0713214	0.0307638	-0.0118485	0.0473937	0.00871536	-0.0484607	-0.0139569	-0.0665186	-0.773707	0.0780228	0.00636415	0.0539295	-0.0112365	-0.18953	-0.088467	-0.0991581	-0.0590042		CGT	-0.0221194	-0.0998018	-0.0653058	-0.0707241	0.0990381	0.103697	0.0581166	-0.109769	-0.0145228	-0.441202	-0.0694201
CTA	0.0881147	0.00548895	0.0604928	0.0937359	0.00317952	0.0371471	0.00686987	0.131382	0.419044	0.00737072	0.0746692	0.0970287	-0.00160735	0.0754311	0.104272	0.0366683	-0.0224369		CTA	0.0761946	0.0852981	0.0831804	-0.0134493	0.0818107	-0.0188259	0.0217505	0.0879033	0.375428	-0.177274	0.0449241	-0.0463284	-0.0634967	-0.0995846	0.0791575	0.00197558	-0.0214972		CTA	-0.0284237	0.0410328	0.0338113	0.0276907	-0.0167273	-0.0692515	-0.00271502	-0.0233267	0.213987	-0.154034	0.0378154
CTC	0.133522	0.183671	0.120113	0.16865	0.223644	0.188777	0.223872	0.0271232	0.450797	0.319059	0.13562	-0.00157366	-0.067921	0.0880996	0.0270049	-0.0099886	0.0657697		CTC	0.111184	0.237447	0.054066	0.209649	-0.0162804	0.0811578	0.13724	0.12936	0.649706	0.0534506	0.0357607	0.0474866	0.0514568	-0.031779	-0.069487	0.086093	-0.0216874		CTC	0.20217	0.00940086	0.125869	0.0302853	0.0747216	0.211714	0.0716154	0.170439	0.23869	0.0366307	0.093928
CTG	0.200489	0.148094	0.0968553	0.187006	0.175556	0.0895314	0.200058	0.132739	0.483351	0.0318561	0.124047	0.0955657	0.0285916	0.1731	0.103819	0.118779	0.0566483		CTG	-0.00145265	0.220336	0.0532172	0.146578	-0.0215712	0.0529058	0.0525252	0.230683	0.370262	0.0240279	0.136483	0.271911	0.0697541	0.183357	0.169216	0.15589	0.111417		CTG	0.15257	0.0804615	0.019378	0.168555	0.101155	0.131727	0.178666	0.0503475	-0.249959	0.0519422	0.176611
CTT	0.0781995	0.130421	0.153618	0.137728	0.0771374	0.0525245	0.0933002	0.00814376	0.384157	0.0784482	0.167359	0.0594834	0.0788174	-0.0399447	0.143567	0.0842613	0.0615385		CTT	0.059951	0.0187696	0.141722	0.0564504	0.0972676	0.0435246	0.0977043	0.0526272	0.391829	-0.164978	0.0767842	0.0045969	-0.0820068	0.0910809	-0.0348224	0.0511641	0.0460644		CTT	0.0508277	0.0566363	0.068761	0.0510969	0.0726999	0.133774	0.122037	0.104055	-0.0686103	-0.065592	0.0580823
GAA	-0.134286	-0.142925	-0.0935596	-0.153143	-0.0954193	-0.0695857	-0.127908	-0.0424396	-0.759131	0.394134	-0.0164038	0.0481706	0.0176342	0.260004	-0.0774043	0.0458444	-0.0121807		GAA	-0.0731344	-0.0293569	-0.0953227	-0.106446	-0.0358847	-0.0373957	-0.0889911	-0.149679	0.22152	-0.0762714	-0.112865	-0.00964413	0.0482364	0.182043	0.0736427	0.0715009	0.0673593		GAA	-0.125491	-0.0789109	-0.130212	-0.128156	-0.0863504	-0.0761502	-0.106755	-0.0774806	0.284262	0.0788214	-0.147394
GAC	-0.0605236	-0.173215	-0.156623	-0.175037	-0.0409025	-0.137515	-0.15492	0.000123438	-1.04207	0.132374	-0.0525629	-0.0505742	0.0403805	-0.0742499	-0.169128	-0.155574	-0.0720068		GAC	-0.0123181	-0.155005	-0.0907372	-0.0482914	-0.0162537	-0.0143084	-0.0508293	-0.145764	-0.62122	-0.176464	-0.206955	-0.0522158	0.0575136	-0.0237658	-0.134449	-0.119013	-0.119608		GAC	-0.12015	-0.137331	-0.112174	-0.153104	-0.0885149	-0.145134	-0.103376	-0.138175	0.179073	-0.182243	-0.412973
GAG	0.0434995	0.0773767	0.111068	0.129159	0.0890818	0.0240518	0.0492359	-0.113699	-0.324809	0.32357	-0.0128366	0.132773	0.208037	0.394537	0.116283	0.256239	0.19393		GAG	0.0450147	0.128919	0.0435101	-0.0263497	-0.0295868	0.0814367	0.0436715	0.0402283	-0.0783351	0.108572	0.14036	0.141497	0.259203	0.192297	0.168598	0.137449	0.122365		GAG	0.0822931	0.142959	0.0904937	0.00166256	0.0870614	0.0801526	0.0255182	-0.0123187	-0.268029	0.178899	0.0461573
GAT	-0.0314628	0.0131876	0.00647924	-0.0267292	0.0382328	0.000337962	-0.0182917	-0.196903	-0.6237	0.296344	0.0749274	0.0168215	0.31398	0.0237651	-0.0164056	0.0556761	0.0217818		GAT	-0.00830398	-0.024598	-0.0455705	-0.0358955	-0.0413978	-0.0241134	0.0288426	-0.0971343	-0.237469	-0.0827082	-0.12833	0.0229458	0.128573	0.0758769	0.045336	-0.0168427	0.060407		GAT	-0.0190523	0.00103393	0.0182584	-0.0516725	0.00418632	-0.00154357	-0.0219635	-0.017458	-0.119018	0.0444737	-0.180701
GCA	0.0588831	0.0529833	0.0597578	0.0935624	0.102699	0.087357	0.0690519	0.0785579	-0.568469	0.165621	0.147298	0.0979886	-0.0124987	0.162296	0.0542222	0.0709399	0.0706589		GCA	0.0513659	0.0392897	0.0590778	0.0842321	0.0889445	0.108752	0.0429045	0.101858	0.291562	0.0663342	0.0318388	0.156354	-0.0827069	0.00806517	-0.041067	0.0961168	-0.00656863		GCA	0.0348504	-0.00949699	0.0499875	0.0899224	0.0068659	0.0379498	0.131371	0.0926294	0.142657	0.22876	-0.0287575
GCC	-0.141761	-0.170815	-0.11495	-0.138767	-0.18155	-0.109446	-0.14242	0.0939946	-1.16694	-0.0179147	-0.184684	-0.235276	-0.385073	-0.302291	-0.271534	-0.146971	-0.1583		GCC	-0.0209464	-0.138528	0.0324003	-0.128594	-0.00532142	0.0137822	-0.0914946	-0.132383	-0.23372	-0.0557161	-0.293781	-0.0675182	-0.201848	-0.189556	-0.135346	-0.082658	-0.124701		GCC	-0.166496	-0.10321	-0.107154	-0.0875882	-0.108108	-0.0528818	-0.0934212	-0.140122	0.15918	0.0993167	-0.367528
GCG	0.166923	0.115156	0.136428	0.00328191	0.155745	0.152522	0.204982	0.0378556	-0.18034	0.218417	0.123788	0.227572	-0.0501111	0.0296784	0.0665244	0.104629	0.0767102		GCG	0.195787	0.132633	0.0965835	0.129636	0.164897	0.185718	0.158922	0.116439	0.169228	0.089865	0.102698	0.0837712	-0.0510689	0.187894	0.0484408	0.100501	0.014523		GCG	0.250935	0.175825	0.107054	0.0431084	-0.0190493	0.102	0.0484514	0.119981	-0.152509	0.269144	0.203741
GCT	-0.278169	-0.231755	-0.21468	-0.211521	-0.241165	-0.229589	-0.201435	-0.340295	-1.55206	-0.133791	-0.259335	-0.316292	-0.341725	-0.459747	-0.397032	-0.295662	-0.238377		GCT	-0.132819	-0.177196	-0.129842	-0.112992	-0.125029	-0.11723	-0.13836	-0.161784	-0.0736581	-0.0361432	-0.324719	-0.223735	-0.282003	-0.1883	-0.282197	-0.216944	-0.173001		GCT	-0.167098	-0.198532	-0.153532	-0.172017	-0.148029	-0.144335	-0.18466	-0.217638	-0.235288	-0.0214072	-0.425471
GGA	0.073177	0.0812548	0.0703768	0.104453	0.0923091	0.140928	0.10384	0.229609	-0.275261	0.374222	0.164267	0.312973	0.267054	0.387244	0.113096	0.156427	0.127833		GGA	0.12709	0.0623799	0.0793018	0.0888006	0.00980026	-0.0138571	-0.0671152	0.160973	0.111581	0.156271	0.0763108	0.138056	0.218265	0.168701	0.160759	0.14845	0.121619		GGA	0.238044	0.0755114	-0.0522165	0.184433	0.0604139	0.00657745	0.113679	0.118453	0.223994	0.218243	0.104415
GGC	-0.0193201	-0.0595061	-0.0515533	0.107245	-0.0118395	0.055721	0.0291119	0.0594151	-0.494415	0.306284	0.101922	0.128838	-0.000390163	0.210718	0.0701279	-0.0126546	0.0462188		GGC	-0.0178809	0.0807307	0.00998877	0.00756287	0.052357	0.0457804	0.0328677	-0.0317195	-0.136104	-0.0171342	-0.00126418	0.0727818	0.0881802	0.198218	0.064555	-0.00933838	0.149972		GGC	-0.0552027	-0.00739574	-0.0066201	-0.0116506	-0.0213498	-0.0514941	0.0412858	-0.0566935	0.116247	0.0172332	-0.228312
GGG	0.137568	0.159389	0.0825357	0.151918	0.149284	0.0921352	0.0419387	0.00545247	-0.191625	0.273664	0.16073	0.150995	0.103408	0.370811	0.220227	0.136992	0.362734		GGG	0.106642	0.0809573	0.0666813	0.0138538	-0.00175502	0.16598	0.0174985	0.111539	-0.0836004	0.166432	0.145754	0.0189869	0.126146	0.236938	0.092823	0.249816	0.115602		GGG	0.0254489	0.0554591	0.122288	0.1828	0.131525	0.0535784	0.0938351	-0.0323742	-0.187011	0.256475	0.016403
GGT	-0.148361	-0.178106	-0.176672	-0.195439	-0.193284	-0.242087	-0.208496	-0.227818	-1.32747	0.139134	-0.0929541	-0.147599	0.0439366	-0.0507743	-0.21028	-0.17405	-0.133741		GGT	-0.132103	-0.158243	-0.0599841	-0.13139	-0.110852	-0.131923	-0.151625	-0.154891	-1.06234	0.242592	-0.16057	-0.0794609	0.146505	0.0294588	-0.146754	-0.0735687	-0.0907778		GGT	-0.139011	-0.124719	-0.109889	-0.11861	-0.173495	-0.167513	-0.167397	-0.145144	-0.178855	0.00909	-0.343273
GTA	0.141709	0.108415	0.0471316	0.154418	0.0434958	0.0409585	0.135986	0.27779	-0.227897	0.359992	0.243512	0.132495	0.0552354	0.216906	0.0897741	0.273049	0.0923337		GTA	0.0347459	0.0359591	0.0641557	0.0985602	0.0634863	-0.013807	0.0706592	0.0203885	0.305865	-0.0248959	0.0789915	-0.0962108	-0.0304252	0.0661146	0.185738	0.169586	0.0028038		GTA	0.0810366	0.0423271	0.102396	0.0749256	0.159657	0.0204121	0.0694731	-0.010234	0.219913	0.0934695	-0.00976206
GTC	-0.143306	-0.23426	-0.232408	-0.234524	-0.164438	-0.270261	-0.168067	-0.026571	-1.28369	0.166206	-0.102681	-0.385417	-0.569756	-0.270902	-0.318162	-0.249946	-0.26705		GTC	-0.0859281	-0.175793	-0.216553	-0.125132	-0.0874859	-0.166104	-0.154325	-0.130644	0.0919883	-0.211138	-0.224349	-0.24087	-0.399271	-0.31503	-0.165325	-0.103109	-0.271897		GTC	-0.144759	-0.129259	-0.166921	-0.176451	-0.137648	-0.14798	-0.101883	-0.150291	0.0715573	-0.239168	-0.415516
GTG	0.14265	0.0567664	0.125533	0.146962	0.127673	0.0753169	0.0958397	-0.0215135	-0.275601	0.332766	0.150531	0.213434	0.0827162	0.182805	0.146011	0.150929	0.174437		GTG	-0.00210747	0.0866869	0.191096	0.159478	0.143231	0.140968	0.0438586	0.117284	0.452039	0.126493	0.192815	0.0283054	0.053833	0.234296	0.152565	0.0968487	0.156489		GTG	0.0630406	0.0370045	0.0762779	0.0658069	0.0644546	0.0347159	0.107272	0.0519922	-0.26347	0.0705187	0.0605492
GTT	-0.194426	-0.188871	-0.154677	-0.122336	-0.188647	-0.140046	-0.14917	-0.143283	-0.985113	0.235916	-0.0206169	-0.249457	-0.281281	-0.214395	-0.165943	-0.0564933	-0.0797775		GTT	-0.121724	-0.134348	-0.0562455	-0.107964	-0.0568665	-0.0879827	-0.0316726	-0.094384	0.5427	-0.275221	-0.168537	-0.153849	-0.177612	-0.182683	-0.163007	-0.100157	-0.0548431		GTT	-0.147906	-0.151636	-0.10347	-0.111546	-0.107582	-0.131591	-0.0793024	-0.0810071	-0.143401	-0.196559	-0.198215
TAC	-0.154841	-0.0911272	-0.168727	-0.207754	-0.145893	-0.140206	-0.0949077	-0.0686571	0.0959508	-0.289522	-0.204644	-0.0774217	-0.273849	0.148582	-0.120781	-0.209695	-0.195334		TAC	-0.0877591	-0.122742	-0.170713	-0.221974	-0.0208702	-0.198448	-0.0676454	-0.0585652	-0.00769575	-0.317833	-0.209172	-0.126386	-0.300228	0.0606448	-0.0811173	-0.137742	-0.189607		TAC	-0.126186	-0.114869	-0.192021	-0.116046	-0.114517	-0.157579	-0.116431	-0.125098	0.220309	-0.197601	-0.173332
TAT	0.0741087	0.0948187	0.0781558	0.133408	-0.00574971	0.0969995	0.0336199	0.0447036	0.248136	-0.00910642	0.0698531	0.119922	0.123063	0.361611	0.0311206	0.104494	0.0620093		TAT	0.145603	0.0616893	0.0865475	0.093301	0.0911734	0.0460771	0.0717974	0.0526881	0.159417	-0.0648931	0.0572259	0.0036081	-0.0135111	0.120002	0.17718	0.0221357	0.0672977		TAT	0.0834312	0.0674976	0.0280911	0.100848	0.0548564	0.0193916	0.0297205	0.0601258	0.0591614	0.0344319	0.0607966
TCA	0.0845215	0.0503132	0.134887	0.0755565	0.0634686	-0.0201564	-0.00169719	0.158944	-0.0912844	-0.0296599	0.0620695	0.165219	0.0440012	0.0962125	0.170835	0.0808933	0.0188759		TCA	0.097817	0.128742	0.108789	0.15999	0.0627168	0.0791097	0.0808806	-0.0151277	0.257125	0.167832	0.0696526	0.0626369	0.0231396	0.155071	-0.0592084	0.157667	-0.0277145		TCA	0.0539924	0.131404	0.0314541	0.128507	0.0920246	-0.0118279	0.10161	0.0563223	0.167122	0.0962725	0.0983766
TCC	-0.112767	-0.0889697	-0.067567	-0.0897252	-0.0955728	-0.208807	-0.136806	0.0642597	-0.0918315	-0.429252	-0.296	-0.306396	-0.266604	-0.156221	-0.210434	-0.281073	-0.317557		TCC	-0.106757	-0.0193486	0.0718853	-0.0593799	-0.0530224	-0.0721924	0.0429514	-0.110579	-0.182258	-0.0180521	-0.212136	-0.211299	-0.258191	-0.174459	-0.192999	-0.173113	-0.318327		TCC	-0.0814957	-0.0682118	-0.123333	-0.0652787	-0.13636	-0.107521	-0.0935129	-0.124016	0.11342	-0.1246	-0.15302
TCG	0.197274	0.130374	0.157614	0.0870045	0.11827	0.101657	0.11105	0.0245734	0.0722716	0.00805687	-0.00751017	0.129936	0.00318741	0.0849397	0.172359	0.187919	0.0575624		TCG	0.0636139	0.184927	0.0981109	0.0367572	0.189541	0.110117	0.106173	0.223	0.274322	0.0440428	0.114616	0.0302795	0.109614	0.243078	-0.0104369	0.00669123	-0.0767211		TCG	0.0608767	0.114283	0.163442	0.088576	0.116245	0.218196	0.0510008	0.103515	-0.135368	0.323651	0.117038
TCT	-0.160702	-0.107875	-0.131186	-0.120875	-0.13598	-0.139127	-0.120748	-0.211174	-0.294171	-0.349204	-0.199067	-0.258582	-0.104745	-0.249101	-0.177698	-0.240979	-0.290249		TCT	-0.0669299	-0.0726437	-0.0840939	-0.0146211	-0.0365971	-0.110841	-0.0966081	-0.0911353	0.0206647	0.0903312	-0.0928549	-0.23553	-0.205628	-0.195307	-0.229411	-0.183759	-0.204431		TCT	-0.145032	-0.115449	-0.11552	-0.0761727	-0.0967392	-0.0481852	-0.0792973	-0.076777	-0.197227	-0.083831	-0.07496
TGC	0.134329	0.0386307	-0.0216037	-0.00120405	0.135169	0.0630182	-0.0746366	0.0564225	0.115396	-0.0560214	0.0678514	0.0406715	-0.0588195	-0.0525574	0.148565	-0.0685165	0.111483		TGC	0.013264	0.0453982	-0.131552	0.0731008	-0.0542146	-0.0659164	-0.0320804	0.104997	-0.617691	-0.0270149	-0.0391441	0.193638	-0.056286	-0.0300479	-0.0483735	-0.166839	0.0065022		TGC	-0.0369068	-0.0274384	0.0870538	0.177091	0.0820805	0.13298	0.0412717	-0.0147304	0.302949	0.0228539	0.0657965
TGG	-0.124305	-0.0598769	-0.0538892	-0.018237	-0.0213854	-0.0758436	-0.0192141	-0.213844	-0.335985	-0.105612	-0.136752	0.0311492	-0.292367	-0.103198	0.107908	0.0152	-0.0575743		TGG	-0.204032	0.0143533	-0.165953	-0.0687448	-0.0331415	0.110367	-0.050269	0.0462451	-0.699125	0.0419316	0.0934557	0.0570101	-0.105354	-0.268951	0.0283437	-0.0492692	0.0240059		TGG	-0.0777208	-0.0817624	-0.0394422	-0.0539358	-0.0432444	-0.0725757	-0.183121	0.0204937	-0.577894	-0.00724887	0.240583
TGT	-0.123171	-0.0968241	-0.15401	-0.030111	-0.17988	-0.156268	0.00110774	-0.127147	-0.427812	-0.0805386	-0.067429	-0.159452	0.13112	-0.455746	0.00211855	-0.130654	-0.0899765		TGT	-0.161784	-0.154367	-0.0698439	-0.0935372	-0.117485	0.0143515	-0.111634	-0.155443	-0.805487	0.113727	-0.182901	-0.0766222	0.0230276	-0.0277078	0.0170873	-0.197947	-0.101335		TGT	-0.130993	-0.0174926	-0.0734362	-0.142146	-0.109404	-0.0967256	-0.149113	-0.0944276	-0.104806	-0.0481014	0.0367528
TTA	0.0080216	0.0309883	0.0515276	0.0397445	0.0235227	0.0438294	0.0317701	0.166755	-0.261493	-0.0218153	0.0998584	0.0768913	0.0425093	0.135655	0.105598	0.0420195	-0.0422067		TTA	0.0214124	-0.00829232	0.0125806	0.0612446	0.0557754	0.0882695	-0.0146216	0.0890271	0.400267	-0.165965	0.128532	0.0415678	-0.0707801	0.145924	0.0816234	0.0587342	0.0678466		TTA	0.0345072	0.0262464	0.0434742	0.00780107	0.075011	0.0369713	0.0243919	0.0485231	0.193769	0.0173238	0.0388893
TTC	-0.0992947	-0.120365	-0.133405	-0.112937	-0.133022	-0.107537	0.000488525	0.0926328	-0.461002	-0.225198	-0.127488	-0.152712	-0.329921	-0.196222	-0.141713	-0.180082	-0.21214		TTC	-0.0093924	-0.118857	-0.064576	-0.0845657	-0.107869	-0.0282715	-0.126423	-0.106516	0.13152	-0.220318	-0.129184	-0.125294	-0.284772	-0.316492	-0.180451	-0.145796	-0.135623		TTC	-0.0652289	-0.100314	-0.111467	-0.130693	-0.140062	-0.113369	-0.115595	-0.0844558	0.0718993	-0.00421438	-0.18462
TTG	-0.19768	-0.203876	-0.166235	-0.124308	-0.136292	-0.10043	-0.0681657	-0.293706	-0.538733	-0.312383	-0.0879083	0.010184	-0.0447281	0.0542315	-0.0560139	-0.0818839	-0.0630036		TTG	-0.118201	-0.165094	-0.145144	-0.107938	-0.060975	-0.0994129	-0.166107	-0.0568985	0.243185	-0.175506	0.0814111	-0.00179458	-0.103697	0.0137471	0.0017001	-0.0518832	-0.0704764		TTG	-0.169612	-0.117135	-0.140946	-0.153139	-0.12321	-0.118798	-0.130822	-0.0723411	-0.977621	-0.0587725	0.0939746
TTT	0.0402586	0.0308953	0.101812	0.0344588	0.0239866	0.0742985	0.0423046	-0.0162523	-0.319108	-0.0359238	0.0246422	-0.00958925	-0.0111171	-0.0170104	0.104342	0.0372316	0.0588541		TTT	-0.035337	0.00927206	-0.0540734	0.0612611	0.0604974	0.0046131	-0.0212291	0.0626113	0.344907	-0.130886	-0.0426051	0.0528832	-0.0467982	-0.0458039	0.0474348	0.0134325	0.0940904		TTT	-0.00361192	0.0500583	0.067066	0.0487955	0.0368798	0.0245738	0.0578154	-0.00572527	-0.0173024	-0.0431058	0.00281413
[truncated: 60 more columns]

## Sheet: Supplemental_Figure_S12
ARTIERI DATA PERMUTED																			MCMANUS DATA PERMUTED
CODON	POS-8	POS-7	POS-6	POS-5	POS-4	POS-3	POS-2	POS-1	POS0	POS1	POS2	POS3	POS4	POS5	POS6	POS7	POS8		CODON	POS-8	POS-7	POS-6	POS-5	POS-4	POS-3	POS-2	POS-1	POS0	POS1	POS2	POS3	POS4	POS5	POS6	POS7	POS8
AAA	0.0198151	0.0198833	0.0192219	0.0203441	0.0219185	0.0215615	0.0213214	0.0208052	0.0217697	0.0206247	0.0215572	0.0199056	0.0195327	0.020869	0.0195364	0.0199805	0.0192156		AAA	-0.00715416	-0.00858395	-0.00464342	-0.0028771	-0.00341873	-0.00582757	-0.00864312	-0.00464929	-0.00350239	-0.0072962	-0.00852492	-0.00681303	-0.00631183	-0.00576668	-0.00597249	-0.00408647	-0.00597443
AAC	-0.00603902	-0.00634099	-0.0054754	-0.0044502	-0.0070514	-0.00546828	-0.00473227	-0.00406446	-0.00600252	-0.00638726	-0.00684912	-0.00772022	-0.00675719	-0.00680784	-0.00664204	-0.00677849	-0.00701014		AAC	0.00187799	-0.00202627	0.00202894	-0.00131839	-0.00244757	-0.000779597	-0.000412402	0.000464704	-0.00226327	-0.00173105	-0.000997081	0.00225806	-0.000537865	0.00142141	-0.000425646	0.00018894	0.00288607
AAG	-0.033334	-0.0323116	-0.0341339	-0.0315814	-0.0325985	-0.0333256	-0.0337058	-0.0340161	-0.0336099	-0.0338349	-0.0325017	-0.0328907	-0.0326932	-0.0326881	-0.0317008	-0.0318696	-0.0329581		AAG	-0.00493184	-0.00513831	-0.0065181	-0.0048107	-0.0032051	-0.00414134	-0.00570855	-0.00380946	-0.00414306	-0.00350693	-0.00648843	-0.00308042	-0.00668739	-0.00683444	-0.00416131	-0.00485114	-0.00645326
AAT	0.0342458	0.0339134	0.0340461	0.0350891	0.0333296	0.032469	0.0328236	0.034078	0.0339281	0.0341905	0.0332533	0.0321117	0.0348858	0.0313755	0.0308864	0.0331131	0.0320888		AAT	-6.23719e-05	0.00254105	0.00039282	0.00227024	0.00295057	0.000439687	-0.00139283	0.00137372	-0.000669408	0.00154804	0.000116722	-0.00141222	0.00309531	0.000835112	0.00113569	0.000436449	0.00175258
ACA	0.00810937	0.00907754	0.00782034	0.0103421	0.00794515	0.00831263	0.00821955	0.011629	0.00806782	0.00960655	0.0111419	0.0102058	0.0116076	0.00950257	0.0109541	0.0099113	0.00881953		ACA	0.00516462	0.00445461	0.0044628	0.00510549	0.00384035	0.00330269	0.0048142	0.00429533	0.0081742	0.00300687	0.00523303	0.00583399	-0.000579606	0.00478766	0.00609726	0.0035626	0.0041074
ACC	-0.0401977	-0.0339585	-0.0405615	-0.0370484	-0.0372867	-0.037314	-0.0382655	-0.0394347	-0.0388857	-0.0354673	-0.0382718	-0.0373139	-0.0377972	-0.0389838	-0.0373242	-0.0363318	-0.0336967		ACC	0.00148363	0.00316479	0.00257149	0.00402775	0.000919569	-0.000233805	0.00218457	0.00276077	-0.000376052	0.000154642	0.00324674	0.00102012	0.00606326	-0.000868997	0.00265183	-3.4334e-05	0.00338375
ACG	-0.0136369	-0.0177535	-0.0147583	-0.014274	-0.0171392	-0.0139303	-0.0153291	-0.0142471	-0.0132731	-0.0176864	-0.0162402	-0.0138493	-0.0128161	-0.0142124	-0.0143518	-0.0150226	-0.0155904		ACG	0.00467411	0.00391862	0.00334518	0.00367776	0.00440539	0.00316261	0.00233183	0.00317976	0.00436407	0.0016869	0.00413682	0.00280086	0.00618139	0.0044395	0.00601525	0.00297366	0.00293873
ACT	-0.033321	-0.0306252	-0.0299944	-0.0322629	-0.0306157	-0.0305091	-0.0282206	-0.0320493	-0.0317378	-0.029081	-0.028095	-0.0330033	-0.0319425	-0.0317484	-0.0327203	-0.0323663	-0.0335801		ACT	-0.00289965	-0.00660017	-0.00190736	-0.00663026	-0.000573353	-0.000782539	-0.002169	-0.00592576	0.00209275	-0.000238072	-0.00214641	-0.00368475	0.000369868	-0.00368365	-0.0034878	-0.000996681	-0.000544574
AGA	-0.0182917	-0.0183984	-0.0188203	-0.0191756	-0.0218	-0.01952	-0.0186491	-0.0184574	-0.0214947	-0.0213829	-0.0205048	-0.0211418	-0.0200131	-0.021786	-0.0207911	-0.0207001	-0.0181367		AGA	-0.00261119	-0.00210078	0.000915404	-6.2865e-05	-2.98221e-05	-0.000831191	0.0021519	-0.00171996	0.00381859	0.00249615	0.0036672	0.00096808	0.00219987	0.00190556	0.000710794	0.00106533	0.00179884
AGC	0.0329029	0.0345286	0.0352865	0.0333669	0.0327897	0.0297353	0.0321254	0.0289531	0.0320709	0.0364543	0.032288	0.0348583	0.0315521	0.0331287	0.0322406	0.0315328	0.03023		AGC	0.00539236	0.00977292	0.009573	0.00620774	0.0103784	0.0106859	0.0103808	0.011651	0.00946272	0.0134096	0.0088764	0.00537184	0.00737908	0.00692894	0.0110873	0.00996981	0.00627112
AGG	0.00984133	0.00962701	0.00758252	0.012138	0.00797977	0.00877353	0.00671163	0.00874198	0.00903155	0.00909629	0.00560258	0.00732272	0.00673622	0.0081181	0.0092565	0.00704822	0.00801659		AGG	-0.000318339	-0.00141412	0.000101655	0.00443039	0.000375328	0.000244462	0.000877158	-0.000853278	-0.00139993	0.00320585	0.0010693	-0.00280158	-0.00221485	0.00614793	-0.00184108	-9.78201e-05	-0.00249593
AGT	0.0270554	0.0226687	0.0271671	0.0286921	0.0294958	0.0263023	0.0243108	0.0275059	0.0259226	0.0279249	0.027507	0.0279216	0.0276914	0.0249876	0.024184	0.0211755	0.0263148		AGT	0.00642352	0.00724131	0.0066894	0.00216566	0.00603113	0.00541722	0.00396818	0.00317136	0.00454606	0.00985475	0.00516377	0.00578789	0.0109394	0.00606948	0.00622209	0.00739445	0.00653106
ATA	0.0582117	0.0607494	0.0580884	0.0588577	0.0610262	0.060303	0.0600697	0.0595332	0.0585184	0.0588517	0.0581845	0.0581547	0.0592743	0.0590846	0.0599648	0.0576892	0.0586004		ATA	0.0132478	0.0123151	0.0117094	0.0131442	0.00849833	0.0128618	0.012822	0.0124394	0.0125902	0.0142083	0.013106	0.0105887	0.0115246	0.0117588	0.011594	0.00910176	0.0128324
ATC	-0.00110489	-0.00454055	-0.00128403	-0.00244947	-0.000718171	-0.00463293	-0.000968943	-0.00553109	-0.00469655	-0.00345037	-0.00176563	-0.002374	-0.00421511	-0.00160169	-0.00245553	-0.000666473	-0.00286918		ATC	-0.00352586	-0.00235078	-0.000661829	0.000210196	-0.00117048	-0.00159161	0.000573051	-0.000974285	-0.00421316	-0.00397075	-0.00217439	-0.00183109	0.000871961	-0.00373689	-0.00377686	-0.00521658	-0.00238239
ATG	0.0127144	0.0152156	0.0139654	0.0150542	0.0158101	0.0142607	0.012942	0.0137409	0.0149306	0.0152999	0.0158891	0.0166268	0.0161711	0.0137566	0.0153159	0.0147101	0.0149647		ATG	-0.00433556	-0.004559	-0.00393282	-0.00564617	-0.00549817	-0.00322853	-0.00382994	-0.00750247	-0.00597302	-0.00639147	-0.00367538	-0.00843092	-0.00636393	-0.00616148	-0.00351113	-0.00680453	-0.00599617
ATT	0.0106765	0.0108407	0.00997531	0.0106716	0.011742	0.0115852	0.0118267	0.0117838	0.0129065	0.00974261	0.00812545	0.0106742	0.00994487	0.0114094	0.00878242	0.0123487	0.00899328		ATT	-0.00366328	-0.00294876	-0.00641422	-0.00615805	-0.00465712	-0.00469093	-0.00685421	-0.00414591	-0.00395764	-0.00631014	-0.00455808	-0.00146346	-0.00677888	-0.00636136	-0.0059815	-0.00549422	-0.00480957
CAA	-0.00164073	-0.000330456	0.000412857	-0.00224078	0.000432761	0.000239023	-0.000862456	-0.00102162	0.000235236	0.000655693	0.00149228	-0.000283062	-0.000510115	0.000993465	-0.00101299	-0.000700899	0.000972269		CAA	-0.00280357	-0.00421971	-0.00229576	-0.00166739	-0.00150851	-0.00103621	-0.00186809	-0.00194549	-0.00387164	-0.00351321	-0.0016405	-0.00195186	-0.00248902	-0.00214936	-0.00375445	-0.00182784	0.00134521
CAC	0.00463571	0.00347299	0.00317	0.0016992	0.00330715	0.00351472	0.00286948	0.00364779	0.00448244	0.00176192	0.00264838	0.00781437	0.00309313	0.0090573	0.00273343	0.00409772	0.00658942		CAC	0.00927868	0.00751102	0.00837902	0.00592042	0.00981049	0.00793227	0.00713726	0.00343894	0.00515786	0.00236976	0.00624308	0.00277072	0.00804482	0.00736126	0.00950532	0.00391346	0.0113265
CAG	0.0206026	0.0242073	0.0211522	0.0200297	0.0211043	0.0203512	0.0217899	0.0185812	0.0218693	0.0196501	0.0203388	0.0219049	0.0234444	0.0203377	0.0228977	0.0217923	0.0221846		CAG	-0.00351156	-0.00495616	-0.000455218	-0.00201141	0.00297768	-0.00223161	0.00229155	-0.00611417	-0.00114375	-0.000173327	-0.000812814	0.00132534	-0.00156903	-0.00240076	-0.00354159	-0.000646351	0.00177905
CAT	0.0197078	0.0210936	0.0197041	0.022146	0.0205041	0.0205698	0.0229205	0.0211227	0.0209345	0.0205652	0.02328	0.0211983	0.0194455	0.0198022	0.0205566	0.0214786	0.0209481		CAT	-0.00297574	0.000113349	-0.000681442	0.000545871	0.00253687	0.0011746	-0.000650597	-0.000183736	-0.00030856	0.00153591	-0.00123526	0.00101999	-0.00143948	0.000703544	0.000107206	0.00292766	-0.00290285
CCA	-0.0419747	-0.0414494	-0.0427206	-0.0439359	-0.0421226	-0.0407921	-0.0421616	-0.0421199	-0.0413321	-0.0420694	-0.0401888	-0.0420571	-0.0428433	-0.0417836	-0.0379163	-0.0411337	-0.0411901		CCA	-0.0106459	-0.00718463	-0.00592574	-0.00830921	-0.00693534	-0.00690628	-0.00441392	-0.00668213	-0.00689978	-0.00422309	-0.00434024	-0.00602579	-0.00971106	-0.00503848	-0.00521017	-0.00617513	-0.00834084
CCC	0.0207415	0.0237735	0.0178132	0.0161118	0.0169659	0.0150836	0.0161816	0.0169715	0.024174	0.0187791	0.0189608	0.0173985	0.016213	0.0164962	0.0143632	0.0186534	0.016891		CCC	0.00606833	0.00414813	0.00458594	0.00421013	0.00563788	0.00225863	0.00409739	0.00703059	0.0063722	-0.00260075	0.00076646	0.00203904	0.00658884	0.00183643	-0.0025769	0.00346655	0.00240772
CCG	-0.0241646	-0.0267256	-0.0237194	-0.0226995	-0.0239434	-0.0242574	-0.0273986	-0.021557	-0.0275763	-0.024794	-0.02289	-0.0253297	-0.026813	-0.0236074	-0.0228254	-0.0230429	-0.0251279		CCG	0.00453194	0.00290143	0.00391233	0.00051	0.000694123	0.00291179	0.00119251	-0.00215277	0.00196001	0.00440797	-0.00279884	0.0020008	0.00392259	-0.00139379	0.00458653	-0.00178314	0.00158344
CCT	-0.0101155	-0.0132555	-0.0125151	-0.00713412	-0.0107394	-0.00889511	-0.0089988	-0.00821443	-0.00934775	-0.00966462	-0.0107765	-0.00867765	-0.00866562	-0.0100691	-0.00858713	-0.00576752	-0.00865983		CCT	-0.00572448	-0.00581786	-0.00943309	-0.0135806	-0.0116455	-0.0113235	-0.00838023	-0.00684078	-0.00517518	-0.00983124	-0.00585217	-0.00886284	-0.00991396	-0.00818155	-0.0100805	-0.00881412	-0.0103884
CGA	0.0801294	0.0781415	0.0749475	0.0727193	0.0715424	0.0750447	0.0748697	0.0744385	0.0773724	0.0802067	0.0806498	0.0732715	0.0752053	0.0747548	0.0766568	0.0720678	0.0758044		CGA	0.02544	0.0221796	0.0235332	0.0323146	0.0225847	0.0222123	0.0278703	0.0313372	0.0317013	0.0234964	0.027551	0.0216249	0.0302101	0.0263682	0.0249424	0.0249048	0.0231026
CGC	0.0624166	0.0615168	0.0645379	0.0659631	0.0681994	0.0598394	0.0649673	0.0630394	0.068443	0.0573905	0.0557193	0.0553158	0.0648971	0.0620522	0.062236	0.0590791	0.0601271		CGC	0.0125743	0.0239262	0.00410885	0.00880144	0.014301	0.0243161	0.0111671	0.0203697	0.019883	0.0106988	0.0168616	0.0203132	0.015855	0.0219197	0.0168676	0.0235871	0.0171529
CGG	0.0644046	0.0608776	0.0605913	0.0565966	0.0623937	0.0644854	0.0541669	0.0601	0.06432	0.0605649	0.0592262	0.0613753	0.055131	0.0575492	0.0578944	0.057257	0.0563521		CGG	0.0196675	0.015106	0.0136187	0.0170226	0.0182988	0.0191508	0.0104478	0.016242	0.0156733	0.015068	0.0131358	0.0193727	0.0143078	0.012362	0.0116438	0.0197794	0.012639
CGT	0.00301934	-0.000668452	0.000757502	-0.00206318	0.0008321	0.00368081	0.0043517	0.00341195	-0.0044475	0.000879066	0.002814	0.00316066	0.000251182	0.00425178	0.000551781	-0.0037511	-0.00221986		CGT	0.00337852	-0.000447123	-0.00328322	0.00366749	-0.000422755	-0.00165406	-0.000530263	0.00498959	-0.00613393	0.000936042	-0.00226408	-0.00207067	-0.000276597	0.00249561	-0.00128418	-0.00483182	-0.00216365
CTA	-0.0146898	-0.0147647	-0.0125896	-0.0111314	-0.00996196	-0.00916474	-0.0126299	-0.0112639	-0.011992	-0.0127261	-0.0104528	-0.011254	-0.0106328	-0.0107948	-0.0135907	-0.00798163	-0.0101687		CTA	-0.000471415	-0.00182947	-0.00206033	0.00242544	-0.00258008	-0.00316094	-0.000969442	-0.0038531	-0.00229663	-0.00181462	-0.0010164	3.92197e-05	-0.00012039	-0.00263855	-0.000795109	0.00179298	0.00271865
CTC	0.00394259	0.00584428	0.00819642	0.00596713	0.00582914	0.00967347	0.0047183	0.00515103	0.00702571	0.00989703	0.0094364	0.00627374	0.00849143	0.0086699	0.00661388	0.008809	0.00761746		CTC	0.00154724	0.000142459	0.00292852	0.00834597	0.00223016	-0.00037187	0.00483518	-0.00058712	-0.00071346	0.00304713	0.00509553	0.00293608	0.00854904	-0.000516415	0.00697556	0.00243309	0.00507915
CTG	-0.0251571	-0.025103	-0.0262082	-0.024189	-0.0254375	-0.0269115	-0.026445	-0.0248263	-0.0250097	-0.0249864	-0.0236527	-0.0252757	-0.0244534	-0.0261845	-0.026325	-0.0278223	-0.0244593		CTG	0.000575376	0.000495416	-0.00133455	-0.00112156	-0.00116677	-0.000320079	0.0012167	0.00211078	-0.000470259	-0.00154824	-0.0024551	0.00509239	-0.000620254	-0.00320153	0.000789202	-0.002302	0.000176616
CTT	-0.00689873	-0.00655316	-0.005687	-0.00564633	-0.00718267	-0.00805972	-0.00241662	-0.00440552	-0.00398755	-0.00417577	-0.00411869	-0.00370631	-0.00430667	-0.004914	-0.00311535	-0.0040383	-0.00272646		CTT	0.00420156	0.00547856	0.00343299	0.00373035	-0.00123411	0.00760696	0.0061449	0.00509033	0.000998554	0.00780339	0.0035374	0.00587933	0.000781721	0.00269004	0.0043874	0.000995102	0.00168887
GAA	-0.0179735	-0.0153559	-0.0136361	-0.0154051	-0.0162233	-0.0143951	-0.0150595	-0.014831	-0.0144617	-0.0175051	-0.0148351	-0.0160347	-0.014235	-0.0177566	-0.0174935	-0.0185226	-0.0163603		GAA	-0.00937029	-0.00760999	-0.00769671	-0.00875894	-0.00676401	-0.00553637	-0.00890232	-0.00986676	-0.00896193	-0.00616172	-0.00714273	-0.00801095	-0.00673275	-0.00665355	-0.00796026	-0.00962157	-0.00813709
GAC	-0.023241	-0.0178616	-0.0190995	-0.0208377	-0.0200401	-0.0209601	-0.0195459	-0.0165811	-0.0194876	-0.0187044	-0.0217912	-0.0200245	-0.0218472	-0.0212271	-0.0191856	-0.0194209	-0.0200027		GAC	-0.00488627	-0.00582357	-0.00221065	-0.00207577	0.00165112	-0.00383932	-0.000520923	-0.00333577	-0.00155379	-0.00203331	-0.00397795	-0.00657009	-0.00707576	-0.000986783	-0.00420412	-0.00414007	-0.00414995
GAG	0.0165441	0.0165598	0.0164608	0.0122604	0.0148967	0.014775	0.0158636	0.0138502	0.0144479	0.0144459	0.0158082	0.0142229	0.0159647	0.0153664	0.0165157	0.0154484	0.0145909		GAG	-0.003282	-0.00338827	-0.00306013	-0.0041566	-0.00151568	-0.00219935	-0.00442051	-0.00321971	-0.00640079	-0.00425363	-0.0031383	-0.00517128	-0.00773568	-0.00256575	-0.00368391	-0.0056844	-0.00665862
GAT	0.015732	0.0132834	0.0120128	0.0124485	0.0137011	0.0147217	0.0133411	0.0145948	0.0142689	0.0142567	0.0116279	0.0141484	0.0134868	0.0116784	0.0128863	0.0139829	0.0119408		GAT	-0.00601796	-0.0095942	-0.00862665	-0.0067403	-0.00986282	-0.00552307	-0.00741442	-0.00752829	-0.00695136	-0.00419671	-0.00645039	-0.00509884	-0.00614073	-0.00875229	-0.00649514	-0.00443678	-0.00926766
GCA	0.0299047	0.0269748	0.0309923	0.0262219	0.0306639	0.0280204	0.0330851	0.027462	0.0268327	0.0268307	0.0291065	0.0301378	0.0300103	0.0296351	0.0262569	0.0304725	0.0300333		GCA	-0.00451419	-0.00122976	-0.00393717	-0.000233047	-0.00726291	-0.00699678	-0.00223933	-0.00368543	-0.00269699	-0.00440789	-0.00482903	-0.00424147	-0.00574736	-0.0077411	-0.00715938	-0.00195807	-0.00607024
GCC	-0.0482665	-0.049403	-0.0486838	-0.0504863	-0.0482349	-0.0481331	-0.0446335	-0.0463746	-0.0485789	-0.046763	-0.045366	-0.0459195	-0.0504448	-0.0476338	-0.0506287	-0.0470914	-0.0444557		GCC	-0.0109873	-0.0123735	-0.00939373	-0.0112111	-0.0124755	-0.0108297	-0.0155131	-0.0118282	-0.0123382	-0.0121345	-0.00638841	-0.0111175	-0.0102996	-0.0120101	-0.00666113	-0.0146633	-0.0132
GCG	0.0348536	0.0372483	0.0346912	0.0326108	0.0308628	0.034055	0.0345543	0.0362025	0.0301847	0.0306479	0.0307791	0.0348796	0.0354723	0.0370646	0.0364228	0.0318234	0.033191		GCG	-0.00375237	-0.00144055	-0.0020845	-4.80041e-05	-0.000263258	-0.00353034	-0.00313334	-0.000777361	-0.00620895	-0.00742844	-0.00830374	0.00535786	-0.00601347	0.00138866	0.000747417	-0.00326814	-0.00628875
GCT	-0.0834354	-0.0770964	-0.0790929	-0.0811431	-0.079177	-0.0826359	-0.0779812	-0.0822277	-0.0804841	-0.0783132	-0.0782674	-0.0778391	-0.075507	-0.0792525	-0.079917	-0.0783379	-0.0788863		GCT	-0.00488209	-0.00404137	-0.00361803	-0.00241821	-0.000785745	-0.0011454	-0.00102166	-0.0017187	-0.00566391	-0.00217951	-0.00418567	-0.00143177	-0.00297002	-0.00593563	-0.00242933	-0.00467932	-0.00456711
GGA	0.0524901	0.0507424	0.050418	0.0540697	0.0528438	0.0508647	0.0496378	0.052259	0.0510403	0.0532362	0.0519591	0.0503521	0.05061	0.0496381	0.0528715	0.0549536	0.0544696		GGA	0.0112626	0.00987408	0.0103187	0.00840733	0.00881605	0.0108099	0.00878483	0.00917961	0.00897579	0.0113535	0.0097988	0.0100282	0.00819188	0.0135542	0.0137831	0.0143061	0.0116963
GGC	0.0161352	0.0135195	0.0181739	0.0149538	0.0128336	0.0143616	0.0158438	0.0123822	0.0133665	0.0172079	0.0151209	0.0110764	0.0135903	0.01317	0.0129498	0.0172695	0.0161217		GGC	-0.0046312	-0.00752594	-0.00931097	-0.00467487	0.000736555	-0.0046906	-0.00393492	-0.00317031	-0.00186567	-0.00326523	-0.00432781	-0.0106054	-0.00457288	1.39173e-06	-0.0046781	-0.0052349	-0.000829489
GGG	0.0349308	0.0336708	0.0340923	0.0355071	0.0353153	0.0377111	0.0359922	0.0312639	0.0318416	0.0318076	0.0341429	0.0327166	0.0330832	0.0326459	0.032856	0.0338385	0.0336902		GGG	-0.00139248	0.00471909	0.00571346	0.00552592	0.00449003	0.00337309	0.00364182	0.000920974	0.00400918	0.00577178	0.00894241	0.00323263	0.0046699	0.00473579	0.00360737	0.00560669	0.00604534
GGT	-0.07496	-0.0732055	-0.0731786	-0.0750935	-0.0759501	-0.0763675	-0.0742021	-0.0740771	-0.0743008	-0.0736412	-0.0766848	-0.075121	-0.0766684	-0.0726903	-0.0758264	-0.0754118	-0.0729713		GGT	-0.0116647	-0.0126212	-0.012106	-0.0148864	-0.0144295	-0.0136274	-0.011012	-0.0153035	-0.0121681	-0.0121549	-0.0136809	-0.0125204	-0.0136031	-0.0160256	-0.0115411	-0.00821016	-0.0106547
GTA	0.0024947	0.00313151	0.000458348	0.00377085	0.00209103	0.00842073	0.00526095	0.00192733	0.00345617	0.00457942	0.00415663	0.00793088	0.00529825	0.00804216	0.00606883	0.0047149	0.00330925		GTA	0.00102895	-0.00372421	0.001706	-0.00312341	-0.000668618	0.0016806	0.00300815	-0.00174665	0.00113366	0.00218367	0.0016637	0.000218795	0.00304199	-0.000315725	0.00160132	0.0029145	0.00264935
GTC	-0.0545342	-0.0563116	-0.0561681	-0.0540891	-0.0563422	-0.056165	-0.0598475	-0.0577267	-0.0565176	-0.0552903	-0.055159	-0.0559619	-0.0554168	-0.0581609	-0.0557664	-0.0566159	-0.0565028		GTC	-0.00283422	-0.000520248	0.000621463	-0.00534536	0.00110776	-0.00544875	-0.00523163	-0.00558284	-0.00526077	-0.00425124	-0.0022613	-0.0016229	-0.00431445	-0.0025708	-0.00235356	-0.00228753	0.00245444
GTG	-0.0194627	-0.025172	-0.022663	-0.0250122	-0.0229442	-0.0227314	-0.0201043	-0.0239072	-0.0223029	-0.0262516	-0.0223768	-0.0229362	-0.0218478	-0.0192989	-0.0224033	-0.0201256	-0.0238009		GTG	-0.00787669	-0.00504143	-0.0096484	-0.00530784	-0.00795046	-0.00594102	-0.00909878	-0.00636996	-0.00661325	-0.0105269	-0.00254347	-0.0102927	-0.00782563	-0.00450764	-0.00985831	-0.0089763	-0.00656843
GTT	-0.0488285	-0.0492141	-0.0454677	-0.0464632	-0.0459727	-0.049609	-0.0467897	-0.0488468	-0.0472653	-0.0505884	-0.0490147	-0.0484375	-0.048048	-0.0491339	-0.0458817	-0.0470103	-0.04698		GTT	-0.00548084	-0.00629311	-0.00563489	-0.0129678	-0.00507434	-0.00802248	-0.00649322	-0.0094199	-0.00629641	-0.00935972	-0.00916569	-0.00897689	-0.00769566	-0.00858893	-0.00793762	-0.00809036	-0.0100007
TAC	-0.00758996	-0.00492607	-0.00735876	-0.0081153	-0.00806136	-0.00732002	-0.0105874	-0.00693461	-0.010245	-0.00803231	-0.00951157	-0.00827321	-0.00573687	-0.00611156	-0.0094312	-0.00586892	-0.00712493		TAC	0.00158763	0.00320774	-0.000616022	-2.26468e-05	-0.00251526	0.000666385	-0.00350104	0.000843914	-0.00139843	0.00162273	0.00108269	-0.000680743	0.00371013	-0.000829332	-0.000998125	-0.00103875	-0.00341138
TAT	0.0379933	0.0396798	0.0369324	0.0363523	0.037241	0.0387493	0.036886	0.0373308	0.03788	0.0393409	0.0382998	0.039147	0.0364491	0.0401934	0.0388575	0.0372658	0.0400547		TAT	0.000840381	0.00734684	0.000976044	0.000213628	0.00118641	0.00139482	0.00312926	0.00598033	0.000750054	0.00089499	-0.00238512	0.000222723	0.00353501	0.00655771	0.00127886	0.00267624	4.53546e-05
TCA	0.00735904	0.0126249	0.0110063	0.0130686	0.0108622	0.0126955	0.0107139	0.0113994	0.0111598	0.00975089	0.0101332	0.0102911	0.00763743	0.0137576	0.0108279	0.00931244	0.0112937		TCA	0.00586506	0.00182499	0.00930886	0.00440372	0.00307714	0.00240281	0.00549919	0.00226979	0.00280458	0.00926382	0.00636404	0.00533643	0.00567203	0.00247446	0.00423194	0.00670089	0.00272323
TCC	-0.0320442	-0.035794	-0.0323211	-0.0334304	-0.0301694	-0.0339198	-0.0315136	-0.0309428	-0.0321265	-0.0306286	-0.0353125	-0.0321243	-0.0315348	-0.0329139	-0.0321559	-0.0340352	-0.0339019		TCC	-0.00239356	-0.00412917	-0.00358592	-0.000397188	0.00072729	-0.00157304	-5.11306e-05	-0.00119572	-0.00239228	-0.000155141	0.00109677	-0.00249603	-0.00486523	-0.000359999	0.00019231	0.00040669	0.00133668
TCG	-0.0214707	-0.018171	-0.0224179	-0.0202206	-0.0184566	-0.0205189	-0.0209713	-0.020026	-0.0223712	-0.0214605	-0.0195889	-0.0202941	-0.0169634	-0.0192698	-0.0161502	-0.0178397	-0.0182975		TCG	0.00244954	0.00317055	-0.000129298	0.00190399	-0.00199073	0.00063663	0.00118464	0.00407849	0.000151755	8.87584e-05	0.00317117	0.00392085	0.00142407	0.00318559	0.0065038	-0.00243678	-0.000517319
TCT	-0.0330679	-0.0349592	-0.0328061	-0.0332398	-0.0344701	-0.0344455	-0.0343158	-0.0342828	-0.0317453	-0.0351291	-0.0339821	-0.0314764	-0.0320052	-0.0299438	-0.0335014	-0.0321131	-0.0320026		TCT	-0.000617435	-0.00239989	0.000386435	-0.00341104	-0.00444314	-0.00406194	-0.00194577	-0.000704768	-0.000229707	-0.00605928	-0.00353801	0.000976788	-0.00420536	0.000519856	-0.00394548	0.00135838	-0.00278829
TGC	0.027225	0.0249636	0.0230651	0.0242601	0.0231416	0.0241805	0.0240834	0.0292246	0.0286263	0.023776	0.0251259	0.0295977	0.0235029	0.0239831	0.026223	0.0279243	0.0246465		TGC	0.00240006	0.004674	0.00790473	0.00900207	0.0025411	0.00634183	0.00929239	0.00864278	0.0108406	0.00836867	0.00807129	0.00438972	0.003696	0.00535434	0.00663595	0.00857909	0.00694479
TGG	-0.0153643	-0.0177157	-0.0133385	-0.0132102	-0.0143049	-0.0143714	-0.0144343	-0.0141684	-0.0120472	-0.0120522	-0.0116667	-0.0131007	-0.0147391	-0.0138808	-0.0102832	-0.0111258	-0.0138618		TGG	0.000276178	0.000218451	0.0022605	0.000697815	-0.000961335	-0.00502963	-0.00113781	-0.00605172	-0.00232584	0.00142488	-0.00210937	-0.00209186	-0.000743396	0.00247296	-0.0016765	-0.00360026	-0.000709493
TGT	-0.00459522	-0.00317286	-0.00462796	-0.00315424	-0.00440258	-0.00459141	-0.00319635	-0.00469579	-0.00515309	-0.00635721	-0.00535295	-0.00949517	-0.00479202	-0.0105272	-0.0036772	-0.0091603	-0.00274759		TGT	0.000867984	-0.000765443	0.00345955	-0.00139186	0.00359892	0.00424463	0.00472845	-0.0031725	-0.00311287	0.0040629	-0.00308829	0.00432809	-0.00102436	0.000123746	0.000559053	0.0041503	0.000312629
TTA	0.0143863	0.014774	0.0148528	0.01479	0.0143575	0.0142483	0.012361	0.0156129	0.0142238	0.0154818	0.0142071	0.0119962	0.0150111	0.0150996	0.015808	0.0144192	0.0106051		TTA	-0.00104317	-0.00343841	-0.00250156	-0.00496314	-0.00583415	-0.00393117	-0.00629389	-0.00211302	-0.00100071	-0.00297063	-0.00532732	-0.004112	-0.00286554	-0.00651041	-0.00546403	-0.00703141	-0.00421376
TTC	-0.0136439	-0.0171025	-0.0132202	-0.0139164	-0.0169389	-0.0164977	-0.0135357	-0.0159355	-0.0172363	-0.0144308	-0.0187633	-0.0176399	-0.0167335	-0.0172037	-0.018211	-0.0193868	-0.017335		TTC	-0.00340325	-0.00588329	-0.00619722	-0.00170197	-0.00449481	-0.00406628	-0.00577869	-0.00206983	-0.00326392	-0.0075122	-0.00633179	-0.00333146	-0.0019528	-0.00657387	-0.00538561	-0.00658878	-0.00250614
TTG	-0.032207	-0.0316843	-0.0332668	-0.0302363	-0.0308128	-0.0311435	-0.0330323	-0.0304641	-0.0321721	-0.0306898	-0.0318105	-0.0285373	-0.0308633	-0.0304574	-0.0306678	-0.0307328	-0.0290248		TTG	-0.00499216	-0.00270309	-0.00659354	-0.00754644	-0.00589461	-0.00535521	-0.00857735	-0.00433685	-0.00298055	-0.00649867	-0.00461186	-0.00591871	-0.00676612	-0.00609211	-0.00908688	-0.0048813	-0.00247428
TTT	0.01803	0.0173201	0.0182222	0.018233	0.0171403	0.0179973	0.0157249	0.0164864	0.0165575	0.0180404	0.0172088	0.016101	0.0181578	0.0141725	0.01637	0.018603	0.0139725		TTT	-0.00244868	0.000277316	-0.00244694	-0.00331251	-0.0047228	-0.0047691	-0.00372871	-0.000723543	-0.00226492	-0.00527157	-0.00323048	-0.00433559	-0.00206161	-0.0044464	-0.00654095	-0.00440179	-0.00224429

## Sheet: Supplemental_Figure_S13
ARTIERI DATA FIRST 250 CODONS (LENGTH 500 - 625)																			ARTIERI DATA FIRST 250 CODONS (LENGTH 625 - 866)																			ARTIERI DATA FIRST 250 CODONS (LENGTH 869 - 4911)
CODON	POS-8	POS-7	POS-6	POS-5	POS-4	POS-3	POS-2	POS-1	POS0	POS1	POS2	POS3	POS4	POS5	POS6	POS7	POS8		CODON	POS-8	POS-7	POS-6	POS-5	POS-4	POS-3	POS-2	POS-1	POS0	POS1	POS2	POS3	POS4	POS5	POS6	POS7	POS8		CODON	POS-8	POS-7	POS-6	POS-5	POS-4	POS-3	POS-2	POS-1	POS0	POS1	POS2
AAA	0.00883003	0.0526095	0.0182927	0.0131625	0.00468714	0.0313265	-0.0515399	-0.0658279	-0.710817	-0.10308	-0.335366	-0.13065	-0.00988827	0.0620971	-0.278483	-0.219444	-0.710463		AAA	-0.0598973	0.0422093	0.0204073	-0.0130563	-0.0750301	-0.0621672	-0.144985	-0.112425	-0.681157	-0.160295	-0.302747	-0.124293	-0.0710585	-0.031926	-0.351781	-0.323063	-0.528204		AAA	0.0594238	-0.0539591	-0.0920505	0.0119642	-0.0169941	0.00864923	-0.014419	0.0509255	-0.56414	-0.0949749	-0.173681
AAC	-0.0788655	-0.050499	-0.0645586	-0.0236776	-0.0482933	-0.0566873	0.0132516	0.0727917	-0.148467	-0.174222	-0.0575392	-0.183707	0.303422	-0.177064	-0.365589	-0.140534	-0.029823		AAC	-0.0240108	-0.0611343	0.0220534	-0.039717	0.104116	0.0459667	0.104878	0.00807893	0.0180775	-0.00595279	-0.12891	-0.0836979	0.199532	-0.00851997	-0.219567	-0.175683	-0.093975		AAC	-0.0159344	-0.0382692	-0.144167	0.1171	-0.044796	-0.0138153	0.108672	0.156546	-0.00102235	-0.0280791	-0.0484501
AAG	-0.0145724	-0.160133	-0.0680207	-0.0399258	-0.060521	-0.109246	-0.115553	-0.195869	-0.251127	-0.179882	-0.334755	0.0241045	0.12977	0.0498477	-0.319989	-0.216978	0.124054		AAG	-0.116991	-0.156894	-0.0409479	-0.0457216	-0.081537	-0.178101	-0.101719	-0.14764	-0.0974772	-0.245423	-0.343419	-0.0528077	0.131018	0.0318277	-0.228211	-0.228477	0.142012		AAG	-0.0258602	-0.119438	-0.0484851	0.0172921	-0.0370008	-0.0327012	-0.102632	-0.167009	-0.0810426	-0.138366	-0.415297
AAT	0.0211085	0.0829262	0.0951697	0.0620312	0.137395	0.0334763	0.0646974	-0.124169	-0.50617	-0.200949	-0.209014	-0.257208	0.218255	-0.201266	-0.158655	-0.0872784	0.00146881		AAT	0.011261	0.0164837	-0.0258265	-0.0450442	-0.0612025	0.0111376	0.0708317	-0.0968867	-0.387507	-0.0705815	-0.166291	-0.231793	0.316988	-0.183453	-0.216656	-0.041983	-0.0544171		AAT	0.0640519	0.0433303	0.0433782	-0.0546318	-0.00218185	-0.0139771	-0.0217016	-0.0794288	-0.360273	-0.165889	-0.19309
ACA	0.0755024	0.105247	-0.00986084	0.11304	0.0258181	0.0651836	-0.085962	0.068192	-0.465748	0.0407058	-0.129384	0.132121	-0.146834	-0.181857	-0.0130988	0.0321057	-0.179347		ACA	-0.0763488	0.0835762	0.0810824	0.121342	0.0213912	0.140788	0.0142299	-0.0669259	-0.40049	0.0335123	-0.161036	0.249989	-0.0796877	-0.172912	-0.0914748	-0.179758	-0.260358		ACA	0.00659329	0.0629136	0.0749322	-0.0530609	0.0965738	0.0577251	0.00838884	-0.0728499	-0.109035	-0.0176138	-0.0566048
ACC	-0.0776198	-0.19773	-0.193337	-0.0376812	0.198242	0.197641	-0.118648	-0.138349	-0.0108371	0.203901	0.0501218	0.150874	0.188008	-0.0162633	0.0452325	-0.0799821	-0.194346		ACC	-0.187762	-0.104735	-0.0406393	-0.102986	-0.104875	-0.171576	0.133379	-0.0254206	0.00208574	0.421657	0.432685	0.189532	0.297401	0.111413	0.0483874	0.074522	-0.0563335		ACC	-0.100648	-0.109583	-0.0548975	0.00263575	0.0940075	-0.181317	-0.00900569	-0.0856343	0.0394067	0.303285	0.041365
ACG	0.141064	0.00177552	-0.0180859	0.0239921	0.0053656	0.00286841	0.0217613	0.0852199	-0.180343	0.342147	-0.15796	0.346689	0.519408	-0.0430993	-0.0206657	0.144154	0.39836		ACG	-0.0615208	0.107137	0.0941516	0.0130504	0.0388652	-0.0919631	-0.0359643	-0.000358723	-0.0611396	0.0346517	0.101672	0.301703	0.426077	0.0382178	0.154906	0.0180822	0.0344691		ACG	0.0416765	0.0446817	-0.0626528	-0.0960749	0.106782	-0.0104374	-0.143712	-0.0638436	-0.0450543	0.27269	-0.0460947
ACT	-0.0767304	-0.0404559	0.00911225	-0.115763	0.0162177	-0.0565901	-0.05277	-0.150551	-0.30293	0.171083	-0.12952	-0.0452414	0.180336	-0.338014	0.0172938	0.0418057	-0.069585		ACT	-0.127243	-0.104714	0.107437	-0.0583617	-0.0475112	-0.107244	-0.090652	-0.197498	-0.205281	0.153392	0.0415559	0.0417161	0.162112	-0.329064	0.0860537	0.0118779	0.114427		ACT	-0.157103	-0.084243	-0.177426	-0.0603456	-0.118409	-0.0772234	-0.0311529	-0.0405029	-0.198563	0.157566	-0.00635105
AGA	0.0747311	-0.0407714	0.066108	0.0102491	-0.0727066	-0.0100151	-0.10207	0.121926	-0.22408	-0.0298871	-0.148221	-0.0974134	-0.0229625	0.175718	-0.100309	-0.125033	-0.280728		AGA	0.0542874	0.0289717	0.126032	0.108944	0.00549964	-0.0114392	-0.135697	0.0641984	-0.18541	-0.0966671	-0.13528	-0.211615	-0.258116	0.077698	-0.246572	-0.166136	-0.236645		AGA	-0.0595398	0.0269801	0.0684781	-0.0250048	-0.0155551	0.023141	0.0456283	0.0886118	-0.0440813	0.0778511	-0.0899261
AGC	-0.181072	0.206671	0.145126	0.28974	-0.048052	0.161009	0.0415862	0.0209474	0.0758234	-0.0427037	0.174285	-0.0598917	-0.466373	0.187933	-0.0949825	-0.151813	-0.0182597		AGC	0.0601289	0.0239661	0.0408446	0.156064	0.122886	-0.0521468	0.145069	0.0676037	0.184974	0.239717	0.24062	0.116963	-0.39135	0.340335	0.0770922	0.0340568	0.0878855		AGC	-0.0568776	0.0499571	0.116216	0.0538292	-0.00343034	0.126385	-0.0399818	-0.00265682	0.162454	0.0519831	0.247361
AGG	0.185779	0.0772942	0.16718	0.10312	0.153556	-0.0265125	-0.0393139	-0.0215087	0.0844184	-0.0851527	0.0888942	0.0985061	-0.529477	0.27135	0.115126	-0.0347486	0.179428		AGG	0.110424	0.27139	0.175253	0.126175	0.184165	0.160866	0.147636	-0.0499378	0.176552	-0.080652	0.0505694	0.10615	-0.428445	0.327954	-0.00195047	-0.156454	0.128275		AGG	0.249898	0.00847487	-0.00981388	0.165196	-0.0790264	0.209135	0.141219	0.0393664	0.237993	-0.112159	-0.129119
AGT	-0.0387413	0.163321	0.205879	0.070218	-0.00345155	0.0479082	0.0412319	0.0351385	-0.189468	0.0143364	-0.195319	-0.24555	-0.390329	0.240049	0.0216321	-0.0150448	0.07601		AGT	-0.0225341	0.0819839	0.0555216	0.129024	0.135606	0.0325884	-0.0495878	-0.0381744	-0.13142	-0.171195	-0.178048	-0.0562073	-0.272976	0.0837947	-0.0634656	0.00608493	0.112065		AGT	0.129255	-0.118487	0.363317	0.0906156	0.03591	0.201954	0.116548	-0.148075	-0.0325231	0.14056	-0.0386482
ATA	0.0209912	0.0549723	0.165082	0.0833908	0.113711	0.230405	0.250115	0.135831	-0.500113	-0.134019	0.0202455	0.0255669	-0.58238	0.0782347	0.0270739	0.0200933	-0.0470337		ATA	0.016648	0.102785	-0.0298041	0.197517	0.17386	-0.0291243	-0.00648957	0.229045	-0.442929	-0.076398	0.00381288	-0.0981745	-0.73683	-0.0175219	-0.0916292	-0.0154386	-0.189769		ATA	0.284832	0.0778346	0.243337	-0.0795427	0.0143937	0.122171	0.0829773	0.341306	-0.262214	0.0134024	0.141963
ATC	-0.188727	-0.120898	-0.0879992	-0.057506	-0.0829346	0.00681646	0.0546091	0.0772858	-0.404306	0.0518391	0.15914	-0.0279017	-0.150064	0.158747	-0.00533668	-0.367951	-0.201096		ATC	0.0431204	-0.0408912	-0.0078827	-0.100994	-0.213784	0.0359708	0.0604935	0.00410073	-0.311007	0.105662	0.196467	-0.130403	-0.155389	0.151848	-5.46037e-05	-0.204291	-0.0576729		ATC	0.0212404	-0.0708444	-0.160835	0.0574614	-0.233901	-0.0795196	-0.130476	0.195334	-0.233304	0.1033	0.135791
ATG	-0.0329052	-0.0180808	0.0229997	-0.0405329	-0.0547148	-0.12444	-0.0597829	0.16911	-0.423795	-0.090895	-0.166655	0.0908043	-0.358907	0.0618796	-0.12282	-0.173505	0.115439		ATG	0.0686437	0.00643792	0.00296206	0.0587999	-0.110665	-0.0298576	-0.0220114	-0.11099	-0.247807	-0.158071	-0.255062	0.0205415	-0.35102	-0.173937	-0.028009	-0.256771	0.248799		ATG	0.0873552	0.181568	0.0498384	0.0328572	-0.0564931	-0.0839667	-0.030067	-0.0103832	-0.133262	-0.0759593	-0.158589
ATT	-0.0599305	-0.0330554	-0.0712465	-0.0425531	-0.0968736	-0.0264417	-0.0195469	-0.0616679	-0.734116	-0.215132	-0.0821067	-0.275423	-0.24905	0.118685	-0.0936887	-0.106204	0.0663693		ATT	-0.0460825	-0.100033	-0.120332	0.00661713	-0.0101802	-0.0531113	0.0935399	-0.0712775	-0.597727	-0.266507	0.106074	-0.330532	-0.151892	0.0319492	-0.103401	0.011296	-0.025411		ATT	-0.134325	-0.0842508	-0.142644	-0.0206497	-0.0744489	-0.00354561	-0.0830414	-0.0537569	-0.590085	-0.113892	-0.110818
CAA	-0.0335	0.0512916	-0.0699748	0.0583098	-0.0189681	0.0421629	-0.0500363	0.0131057	0.157138	-0.31809	-0.195202	-0.15212	-0.226497	-0.524697	-0.161853	-0.1209	-0.556586		CAA	-0.038638	-0.0747535	-0.0768943	-0.0470123	0.0193606	-0.0163465	-0.0158207	-0.0393615	-0.120755	-0.501908	-0.277472	-0.129273	-0.0241264	-0.470438	-0.180234	-0.225491	-0.463288		CAA	0.0750261	-0.0595756	-0.00439128	-0.0173015	-0.0740322	0.0313136	0.0516159	-0.0195482	-0.0132821	-0.410031	-0.218849
CAC	0.110318	0.0322652	0.0973755	-0.0680938	0.0274635	-0.0453468	-0.0858094	-0.0215947	0.258844	-0.0687161	0.137352	0.301633	-0.0817989	-0.812132	0.0711984	0.208892	-0.0628805		CAC	0.0426926	-0.0658661	0.0262179	-0.192947	-0.112446	0.0172543	-0.00584795	0.0233109	0.48421	0.110689	0.151528	0.304344	0.0300218	-0.762535	0.207628	0.148991	0.0830873		CAC	-0.0324109	-0.102989	-0.203078	-0.146212	0.228773	0.0528416	-0.0991816	-0.0670824	0.107042	-0.0960228	0.0842423
CAG	0.127214	-0.05039	-0.0411593	0.000875431	0.0661545	0.0199127	0.0491295	0.0337149	0.175495	-0.216698	-0.25831	0.145488	0.364541	-0.337512	-0.0121585	0.0426448	0.369247		CAG	0.0715368	-0.0297029	-0.0127446	0.073547	-0.0405128	0.121068	0.0372563	-0.12228	0.185446	-0.140494	-0.206797	0.0130866	0.333428	-0.116586	0.129009	0.0334148	0.369764		CAG	-0.0279274	-0.00491231	0.050689	-0.193295	0.0959636	0.113314	-0.0656726	-0.0821973	0.146992	-0.168813	-0.116089
CAT	-0.0205359	0.167271	0.0998686	0.0893889	0.0963333	-0.0636582	0.0289545	-0.133962	0.0119702	-0.299322	-0.248846	0.0115098	0.0947678	-0.752359	0.123844	-0.0635126	0.00453709		CAT	0.0433148	0.104361	0.0505512	-0.0473378	0.108427	0.0417188	0.154782	0.0368992	0.223675	-0.270063	-0.143203	-0.0163616	0.260084	-0.787455	0.0774566	0.0698283	0.129576		CAT	0.185289	0.202942	0.0511415	-0.0130541	0.00821265	-0.113878	0.125603	-0.0730541	0.111882	-0.344959	-0.257846
CCA	-0.000707801	0.0240836	-0.0953907	0.0210695	-0.0920952	-0.0122512	-0.0115753	0.00391648	0.104236	-0.284148	0.00530218	0.0476031	0.633805	0.468299	0.119601	-0.125303	-0.285807		CCA	0.137906	-0.117988	-0.121751	-0.014778	0.00858506	-0.055461	-0.104529	0.0843324	0.0103265	-0.22993	0.136721	0.123289	0.619826	0.397466	0.27976	0.0291361	-0.203085		CCA	-0.0280433	0.0839312	-0.133589	-0.0920101	-0.0486701	0.0312058	0.0370909	0.181854	0.0615738	-0.443739	0.17072
CCC	0.0611128	-0.0534359	-0.211901	-0.122584	-0.0664704	0.0232462	0.0828237	-0.00650309	0.691403	0.295011	0.483795	0.0338402	0.875294	0.338743	0.590037	0.523633	0.244559		CCC	-0.0658005	-0.0699062	-0.0858983	-0.0933213	-0.0760517	-0.0889911	0.174958	0.280313	0.544195	0.334565	0.323041	0.314496	0.717333	0.0901441	0.412494	0.254527	0.241033		CCC	0.0203345	-0.0961753	0.0135122	0.112496	0.00232134	-0.0358796	-0.230902	0.0359489	0.29463	0.0709918	0.420747
CCG	-0.0733518	0.201395	-0.0945211	-0.157668	0.176558	0.332472	0.0545373	0.177947	0.541122	0.200126	-0.110478	0.238789	0.613591	0.465418	0.146389	0.278884	0.291399		CCG	0.15351	0.147914	0.125625	-0.0718894	0.0380336	0.13254	-0.135364	0.145897	0.396156	0.0340549	0.0594289	0.0378509	0.455923	0.383994	0.457344	0.150064	0.312988		CCG	0.0979143	0.11462	0.170443	0.375992	0.224594	0.0311078	-0.020385	-0.137073	0.501562	0.257694	0.217906
CCT	-0.0921977	-0.08343	-0.210236	-0.241843	-0.0623301	-0.2396	-0.0956798	-0.197742	0.478164	-0.218253	0.186692	-0.00738662	0.889362	0.0564191	0.317701	0.141281	-0.0482867		CCT	-0.0191909	0.163308	0.0157057	0.15201	0.0600259	0.127502	-0.0725946	0.0368758	0.499945	0.0927004	0.211761	-0.0640693	0.78349	0.117824	0.328986	0.448434	0.0189916		CCT	-0.119659	0.0507707	-0.256601	-0.0889036	-0.0114807	-0.146304	0.140689	0.0321368	0.129032	-0.149859	0.026088
CGA	0.298926	0.290175	0.162816	0.210983	0.345821	0.15939	0.456207	0.510524	0.341684	0.276128	-0.0123829	0.0882262	-0.645778	0.00213057	0.328244	-0.065086	0.15891		CGA	0.653895	-0.0201904	0.369695	0.553403	-0.00863099	-0.100448	-0.0891252	0.146256	0.052455	-0.228372	-0.0585459	-0.228773	-0.123675	-0.465126	-0.120618	0.117555	0.115874		CGA	0.587711	0.153481	0.127579	0.0532492	0.367235	0.139639	0.552305	-0.179023	0.285695	-0.105147	0.467948
CGC	0.307646	-0.0963161	-0.0613329	-0.0901357	-0.112977	-0.102827	0.050974	0.269745	0.681884	-0.0762688	0.400373	0.214243	-0.204	0.292718	0.485281	0.367722	0.0928181		CGC	0.0381716	0.0659403	0.0658897	0.171205	0.252797	-0.13594	-0.00396023	0.295631	0.147439	0.166485	0.281188	0.45799	-0.379975	0.430946	0.328041	0.0971252	-0.189388		CGC	0.231422	0.20497	0.263141	0.0552067	0.097673	-0.245976	0.058715	0.121487	0.407216	0.0226457	0.570101
CGG	0.229723	0.159989	0.193162	-0.237262	0.25287	-0.426015	0.0832305	0.170078	0.231037	0.0451931	0.259867	0.347497	0.518872	-1.05526	0.220475	-0.486337	0.152534		CGG	0.0194517	0.208978	0.243117	0.350383	0.314078	0.531306	0.220244	0.30078	0.451668	0.384573	0.207462	0.0801015	0.56897	-0.378574	0.176079	-0.132059	0.118044		CGG	-0.637971	0.514395	0.300121	0.0571487	0.252256	0.544954	0.725868	0.503879	0.681736	0.139157	-0.392751
CGT	-0.0506001	-0.0996718	-0.0314622	0.236313	0.0183338	0.101311	0.0141529	-0.1305	0.284146	-0.134024	0.056842	-0.180082	-0.260855	-0.49254	0.273354	0.367377	0.1168		CGT	-0.117708	0.0102415	-0.0392926	0.0106127	-0.0228552	0.0501579	-0.0580442	-0.0362186	0.247789	0.0508407	0.135325	0.0478399	-0.146184	-0.0410853	0.231804	0.241473	-0.0864262		CGT	-0.265124	-0.200853	-0.09543	-0.0973594	-0.20345	-0.0257713	-0.328787	-0.315148	0.175234	-0.427087	-0.0829603
CTA	-0.0853453	-0.0319666	0.0952442	-0.0861263	-0.0926643	0.06472	-0.0355949	0.00986245	0.0999052	-0.400752	0.176621	0.0840339	-0.0425882	0.257441	0.225028	0.129469	-0.21938		CTA	0.0405543	0.130472	0.249413	-0.00706573	0.00878931	0.133701	0.0097423	0.0673422	-0.0652627	-0.195579	0.0953143	0.0167931	-0.0642886	-0.0790363	0.165627	-0.115085	-0.322723		CTA	-0.0111148	-0.181351	-0.135316	0.0830725	-0.0243539	-0.147505	-0.212188	0.150938	-0.126007	-0.17886	0.180079
CTC	0.0252786	-0.0512548	0.542313	0.164614	0.121226	0.223201	0.16655	0.0799486	0.520949	0.160987	0.431459	0.247106	-0.00686227	-0.0589887	0.375195	0.62919	0.153846		CTC	0.131621	0.276441	0.172382	0.089185	0.104335	0.0370597	0.0938074	-0.151491	0.473646	0.0177199	0.436625	0.57545	-0.163653	0.165439	0.299051	0.330753	0.0439525		CTC	0.0760031	-0.0236149	-0.127534	0.147087	0.378467	0.0120367	-0.000424639	0.00283992	0.254901	0.274403	0.220013
CTG	0.0439026	0.0311273	0.0615972	0.205333	0.0202485	-0.0386037	0.178318	0.14363	0.366117	-0.347577	0.281195	0.368272	-0.0771939	0.00213442	0.180909	0.0465548	0.238818		CTG	-0.0197794	0.110893	0.0238202	0.0957278	0.0828717	0.0846454	0.0461579	-0.112535	0.286758	0.0606865	0.269052	0.292405	-0.0845231	-0.0963901	0.289784	0.17155	0.257279		CTG	-0.0379178	0.194596	-0.184191	-0.0474059	-0.0039293	0.198356	0.196558	0.0943889	0.16661	-0.185619	0.193276
CTT	0.0736718	0.0452414	0.0647689	0.0647737	0.0140041	0.12239	-0.0787836	-0.148941	0.267087	-0.287812	0.102818	-0.029613	0.0442086	-0.165526	0.214916	0.208905	0.0822571		CTT	0.0990564	-0.0938987	-0.0653284	-0.00800051	0.0415093	0.0636535	0.106724	-0.173814	-0.0188106	-0.429035	0.0591031	0.0314094	-0.0700089	-0.438647	0.11962	0.267555	0.0835832		CTT	-0.0739156	0.00176533	0.0428185	0.0928679	-0.148603	0.114493	-0.110631	-0.113406	-0.223969	-0.309295	0.0943667
GAA	-0.116458	-0.0802174	-0.131733	0.00801329	-0.0366401	-0.0305821	-0.0650971	-0.0418501	-0.0256267	0.040751	-0.32228	-0.117884	-0.176402	0.195149	-0.337763	-0.173184	-0.659394		GAA	-0.0722171	-0.110773	-0.150856	-0.0466664	-0.0744191	0.0111243	-0.11739	0.000326598	-0.0341436	-0.0338118	-0.318516	-0.213627	-0.157648	0.214418	-0.366017	-0.174535	-0.482531		GAA	-0.0748208	-0.0593693	0.056307	-0.0023219	0.00367085	-0.0987443	-0.130248	0.0113899	-0.0437339	-0.0200039	-0.32059
GAC	-0.0997358	-0.148664	-0.208111	-0.201129	-0.184741	-0.0734422	-0.215348	-0.024949	0.10323	0.0444289	-0.0395452	0.109675	0.168596	-0.00840672	-0.175641	-0.015923	-0.0609405		GAC	-0.101597	-0.0459936	-0.168005	-0.0141359	-0.0799157	-0.0584871	-0.144817	-0.0529497	0.0928045	0.0271236	-0.0339031	0.113504	0.0949005	0.0164921	-0.144264	-0.0810353	-0.0507557		GAC	-0.00672966	-0.111001	-0.0524412	-0.0811876	-0.195932	-0.127939	-0.210927	-0.0481025	0.117343	0.172403	0.0788727
GAG	-0.155784	-0.081831	-0.0819472	-0.124559	-0.0528934	-0.118302	-0.0415613	-0.079053	0.203118	0.195823	-0.206583	0.257354	0.206246	0.447536	-0.15502	-0.0954799	0.192073		GAG	0.0452835	-0.0956511	-0.0258547	-0.00348233	0.0655794	-0.0826122	-0.00545548	-0.0321478	0.131303	0.0221848	-0.229266	-0.0538098	0.0790698	0.317229	-0.110964	-0.141107	0.116604		GAG	-0.0745822	0.0245727	0.00167518	-0.117228	-0.0992819	-0.209686	-0.0411731	-0.121307	0.192791	0.197761	-0.244551
GAT	-0.000410007	-0.00377697	-0.0872895	-0.05478	-0.0968928	-0.0851751	-0.130572	-0.225597	0.00727903	-0.165093	-0.216072	-0.0967333	0.199776	-0.11747	-0.201518	-0.00932749	0.108644		GAT	-0.0560998	-0.0826872	-0.0361014	0.0304829	-0.0702746	-0.0501621	0.0114905	-0.240857	-0.0749522	-0.102752	-0.18632	-0.0312065	0.12833	-0.115146	-0.23387	-0.0577757	-0.019034		GAT	-0.0960531	-0.020909	-0.0772528	-0.0265339	-0.00918102	-0.069787	-0.0588375	-0.14993	0.00285243	-0.110693	-0.138716
GCA	0.0737547	0.102951	-0.032541	0.0150185	-0.00909171	-0.0913213	-0.00344889	-0.0427174	-0.181166	0.169322	0.19673	0.173647	-0.325318	0.164475	-0.334628	0.0185198	-0.313065		GCA	-0.132344	-0.0396179	-0.0809759	-0.0729247	0.0606417	0.00799329	0.0320352	0.243721	-0.165832	0.297287	0.0289076	0.268235	-0.259331	0.244116	-0.0849186	-0.0920237	-0.24599		GCA	-0.0341498	-0.0303251	0.170689	0.131371	-0.12578	-0.0480757	0.0463988	-0.00306579	-0.185957	0.224632	0.00307629
GCC	-0.152783	-0.142573	-0.114674	0.0281243	-0.102541	-0.0937999	-0.11397	-0.126769	0.285129	0.410667	0.231441	0.136711	0.0513007	0.147344	-0.171201	0.0337451	-0.123565		GCC	-0.0201104	-0.0544357	-0.102555	-0.197099	-0.253332	-0.194638	0.0731317	0.00543446	0.249229	0.300724	0.145714	0.0980738	-0.0195624	0.246874	-0.142896	0.170297	-0.0534738		GCC	-0.217508	0.0733969	0.0203618	0.0238575	0.187942	0.00314153	0.00103524	0.338058	0.104366	0.470989	0.411706
GCG	0.109254	0.156064	-0.0018224	0.133728	-0.110518	-0.131424	0.0533603	0.108181	-0.0163194	0.475488	0.160491	0.455629	-0.409359	-0.297079	-0.1107	-0.118103	0.189658		GCG	0.0217231	-0.0963214	-0.005458	-0.142794	-0.0784866	-0.0445655	0.0996692	0.089974	-0.00194711	0.441031	-0.063063	0.0557891	-0.500697	-0.218226	-0.301172	-0.0200563	0.0934454		GCG	0.0639313	-0.10009	-0.0771966	-0.235841	-0.163301	-0.0561612	-0.147065	-0.0519439	0.283691	0.320957	0.109231
GCT	-0.0797225	-0.155443	-0.0425622	-0.0840814	-0.0587729	-0.130477	-0.241648	-0.242186	-0.119563	0.260052	0.0501155	-0.0999057	-0.00625665	-0.069967	-0.298903	0.048686	-0.0327682		GCT	-0.173586	-0.102485	-0.0765181	-0.0083276	-0.101929	-0.109284	-0.112158	-0.188917	0.0216934	0.20343	0.132245	-0.00910992	0.0640879	-0.122998	-0.199856	0.146089	0.00679044		GCT	-0.0998829	-0.200559	-0.158817	-0.126171	-0.0726093	-0.0176794	-0.0840607	-0.177412	-0.0726195	0.208426	0.00367167
GGA	0.0608365	-0.0270219	0.136332	0.0226366	-0.107496	0.0617117	0.0862397	0.104943	0.140871	0.10292	0.0786255	0.0195995	0.29833	0.191736	-0.175684	-0.0190647	-0.301272		GGA	-0.0231586	-0.192424	-0.0506988	-0.116799	-0.0779211	-0.0877775	0.0504518	0.0468553	0.0661698	0.00217908	-0.281693	-0.035228	0.233877	0.00516571	-0.230853	-0.102517	-0.158182		GGA	0.140421	0.205881	0.174901	0.166998	0.0759683	-0.0527869	0.0339032	0.245973	-0.206633	-0.0566786	0.00181632
GGC	-0.0925838	-0.0357441	0.0384776	-0.0932464	-0.0192005	-0.0372241	0.132564	0.155363	0.508709	0.254611	0.160626	0.130156	0.236379	0.347637	0.0276564	0.107639	0.202302		GGC	0.0298245	-0.125785	-0.0504168	-0.0472691	-0.0701954	-0.15215	-0.129436	-0.0923053	0.272644	0.193448	0.151056	0.0899843	0.128868	0.247908	-0.0820678	0.00147695	-0.0324363		GGC	0.0820187	0.173579	-0.0183367	0.044377	-0.0173924	-0.0726681	-0.100353	0.0693386	-0.0344456	0.102012	-0.0290245
GGG	0.0611795	0.119497	0.128046	0.208536	-0.0629588	-0.149252	-0.0607148	0.00209242	0.28728	0.398905	0.100051	0.237215	0.180482	0.703045	0.195965	0.0868695	0.371745		GGG	0.113016	0.179126	-0.0506543	-0.0771291	0.0865404	-0.0423407	-0.112727	0.0237918	0.327541	0.47112	0.020013	0.183061	0.13671	0.621906	0.181396	0.209886	0.378528		GGG	0.0191126	0.163756	0.156249	-0.0654784	0.093894	0.302912	-0.0626627	-0.338812	0.0152768	0.0897846	-0.097155
GGT	-0.0913565	-0.102304	-0.0765971	-0.125346	-0.0749878	-0.143337	-0.136745	-0.192221	0.123322	-0.0839494	-0.110251	-0.182227	0.172661	0.0886798	-0.161824	0.0116365	-0.00394568		GGT	-0.021839	-0.108075	-0.171528	-0.16059	-0.0812338	-0.118324	-0.201826	-0.131411	0.027333	-0.100002	-0.0579177	-0.185205	0.066363	0.0377508	-0.132378	-0.109657	-0.0904125		GGT	-0.108121	-0.0307735	-0.139909	0.00298808	-0.112805	-0.0802554	-0.0961482	-0.125935	-0.139584	-0.020655	-0.106321
GTA	0.160176	0.10977	0.00637084	-0.0368764	-0.105419	-0.0870188	0.0295809	0.189126	-0.0906649	-0.236517	0.00321251	-0.150541	-0.503203	-0.0618107	-0.260103	-0.147821	-0.276773		GTA	0.147916	0.118379	-0.0132136	-0.0394344	0.0914259	0.0592291	0.138204	-0.00146781	0.0803373	0.0348925	0.105756	-0.15998	-0.382873	0.165991	-0.411611	-0.0885785	-0.143294		GTA	0.146929	-0.199325	-0.153982	0.0528349	-0.0464048	0.10478	0.0783486	0.167361	0.0293239	0.191233	0.103548
GTC	-0.109667	-0.0587831	-0.220146	-0.235803	-0.0687336	-0.0246794	-0.0656305	-0.213928	0.188558	-0.0483958	0.112242	-0.207161	-0.446963	-0.000237505	-0.0964046	0.0280912	0.0638234		GTC	-0.144621	-0.139922	-0.285534	-0.142498	-0.0667822	-0.0843541	-0.184879	-0.0156273	0.139215	-0.0286002	0.227064	-0.170965	-0.388758	0.0292459	-0.14237	0.0988588	0.068762		GTC	0.0986063	0.0382013	0.00308643	-0.227954	0.0592335	-0.0414087	0.230828	0.144718	0.109567	-0.0638989	0.301643
GTG	-0.0511499	-0.208125	0.0844684	0.133328	0.221402	0.133123	-0.0270572	0.118562	0.194893	0.0454204	-0.110032	-0.166554	-0.118011	-0.17327	-0.294585	0.0947238	0.212188		GTG	-0.00135964	0.0257026	0.0548949	0.103421	-0.113815	0.231932	0.218524	0.1146	0.170416	-0.0265534	-0.126951	-0.0693021	-0.0841158	-0.0935368	-0.218191	0.0942546	0.121816		GTG	0.172678	-0.148109	0.0101864	-0.069153	-0.232784	-0.0284311	0.0293309	0.07436	0.388625	0.0876939	-0.174348
GTT	-0.179097	-0.0831935	0.0169605	-0.076925	-0.131391	-0.0464459	-0.0546806	-0.152236	0.0567854	-0.060292	0.113474	-0.26359	-0.436936	-0.212325	-0.208366	0.0526789	0.0299546		GTT	-0.0535379	-0.108968	-0.088024	-0.107302	-0.0048995	0.0307002	-0.101043	-0.231289	-0.0347168	-0.172371	-0.00304803	-0.258571	-0.32925	-0.0383842	-0.141695	-0.0212177	0.0558857		GTT	-0.0864474	-0.0181996	-0.00238785	-0.0732698	0.00372512	-0.0866628	-0.00092386	-0.151805	-0.0702311	-0.0446121	0.063474
TAC	-0.0198591	-0.051913	-0.0167169	-0.0277109	0.0176634	-0.0390949	0.00756366	-0.00168844	0.131454	0.00220837	-0.22577	-0.301422	-0.359289	0.440487	-0.0488057	-0.170055	0.0235327		TAC	-0.143696	0.013762	-0.0238297	-0.000496237	-0.0329071	0.0306373	0.000679697	0.0473078	0.120145	0.030933	-0.107403	-0.0961941	-0.149123	0.35427	0.0361101	-0.0728094	0.163836		TAC	0.144176	-0.118978	0.0371143	0.0678432	0.061954	-0.135824	-0.156673	0.0497769	0.222035	0.0707134	0.079865
TAT	0.0142357	0.00213358	0.0487412	-0.125884	-0.092951	0.175906	-0.113596	0.0132653	-0.211141	-0.152582	-0.278026	-0.445998	-0.254115	0.121152	-0.104253	-0.0311357	0.162349		TAT	0.000937368	-0.0157247	0.011944	-0.0563863	0.0486717	0.0670419	-0.0616414	-0.0678799	-0.127468	-0.15641	-0.136108	-0.279491	-0.17513	0.218263	-0.0465015	-0.100911	-0.122133		TAT	-0.187432	0.114073	-0.04823	-0.150693	0.0587764	0.00657635	0.10612	-0.171457	-0.0200918	-0.00483919	-0.28684
TCA	-0.00423613	0.0562786	0.149832	0.042916	0.0673423	0.103184	-0.0235966	0.121933	-0.309805	0.0517345	0.0855208	0.0518214	0.0231816	0.102822	-0.0425851	-0.0661968	-0.25519		TCA	0.0704008	-0.0471279	0.100945	0.0559848	0.0570847	-0.0138483	0.0147207	0.0922198	-0.271648	-0.0356001	0.0819068	0.0505978	0.0815611	0.145973	0.0850536	0.0994349	-0.0724765		TCA	-0.0308508	0.0720711	0.0110761	0.0489009	0.105983	0.0199207	-0.137298	0.0475595	-0.261816	-0.13553	-0.0562636
TCC	-0.042242	-0.0599097	-0.289988	-0.0121844	-0.00676238	-0.0507893	-0.0323883	-0.150919	0.304725	0.387771	0.226039	0.189818	0.379012	0.368441	0.279292	0.168049	0.0367468		TCC	-0.0967351	-0.00699515	-0.0134647	-0.0069987	0.0306946	-0.135234	-0.199697	-0.113663	0.157952	0.301312	0.255993	0.224896	0.335244	0.407247	0.334739	0.235189	0.17231		TCC	-0.169929	-0.322547	0.0116998	-0.153526	-0.0287516	0.0188064	0.00229703	0.21127	0.158296	0.39454	0.362299
TCG	0.22596	0.0999626	-0.120769	0.0739638	0.0457084	0.291359	0.136915	0.0958088	0.119723	0.245537	0.0465053	0.175572	0.058902	0.226751	0.150832	0.15165	0.227017		TCG	0.139829	0.0932047	-0.0508383	0.00496006	0.0126848	-0.0153005	-0.0229729	0.0688035	0.060099	0.0310074	-0.0348564	0.0756557	0.108213	0.154438	0.089729	0.106575	0.102155		TCG	0.00335427	0.0441013	-0.0531378	0.325596	0.108428	0.0993022	0.128572	0.0794337	-0.0237917	0.292012	0.110258
TCT	-0.0714538	-0.0112412	-0.067516	-0.0914453	-0.0289756	0.0716442	0.0313937	-0.170216	-0.00714335	0.206379	0.0968696	-0.0394807	0.279567	0.0777962	0.14	0.0538737	-0.0546398		TCT	-0.160143	-0.0916522	-0.0858878	-0.117326	-0.0103134	0.0684837	0.0456111	-0.0700606	0.0161685	0.14973	0.032171	0.0936509	0.350803	0.110168	0.198762	0.190041	0.0976656		TCT	-0.0678127	-0.00503764	-0.00931802	-0.0231616	-0.0812768	-0.0632866	-0.0567051	-0.138918	-0.0446376	0.118479	0.0208238
TGC	-0.0306727	0.121299	0.152703	0.303939	0.175594	0.0287704	0.281188	0.0319563	0.137475	0.340596	0.385825	-0.0773968	0.0667463	0.134398	0.0958371	-0.224005	-0.429849		TGC	0.109199	0.180857	0.232428	-0.105674	-0.0322354	-0.0734489	-0.119159	0.33295	0.00719482	0.212397	-0.105514	-0.0611863	-0.0211308	0.0753492	0.237558	0.0167033	-0.103534		TGC	0.057507	0.265655	0.010014	0.258316	-0.0123388	0.400329	0.0509307	-0.182214	0.315477	0.403357	0.233695
TGG	0.133344	-0.00418225	0.0993588	0.0450681	0.0183291	-0.0173661	-0.0220428	-0.135935	-0.0415276	-0.27158	-0.283965	0.0353378	-0.37771	-0.350766	0.208603	-0.0944745	0.323626		TGG	0.0189668	0.0672461	0.0835981	0.0696486	-0.0783678	-0.0276544	-0.0261916	-0.0764862	0.0805933	-0.238464	-0.244901	-0.225021	-0.495779	-0.518989	-0.104982	-0.216759	0.0425653		TGG	0.0667777	-0.341574	-0.241488	-0.164736	0.0618363	0.140312	0.0976413	0.148969	0.164743	-0.513079	-0.426034
TGT	-0.0706599	0.056102	-0.236589	-0.191043	-0.0137903	-0.0357723	0.0413271	-0.0115873	-0.121408	-0.0255279	-0.196291	-0.531468	0.239005	-0.65585	-0.0850394	-0.160802	0.0995908		TGT	-0.101072	-0.0461441	-0.326004	-0.044601	-0.0829189	0.0393274	0.0752523	-0.00915407	-0.118251	-0.171967	-0.0739525	-0.293775	0.283605	-0.471034	0.069494	-0.254286	0.0515531		TGT	0.0140646	-0.0434288	0.149423	-0.21878	-0.186068	-0.311063	-0.101727	-0.0114986	-0.160296	-0.269226	-0.527595
TTA	-0.0560597	-0.0771006	0.0367286	-0.0381136	0.0631666	0.115414	0.107759	0.200504	-0.602189	-0.0565792	-0.0812448	-0.1122	-0.0449042	-0.0739269	-0.120174	-0.0185433	-0.0942669		TTA	-0.0491805	-0.0518455	0.0201911	0.0113113	-0.0333551	0.134637	0.0737379	0.139976	-0.540415	-0.213345	0.00526786	-0.0539407	-0.206972	-0.114426	-0.0232227	-0.147337	-0.0691697		TTA	0.00607206	-0.0345306	0.223724	-0.00990016	-0.00275391	-0.0958373	-0.0404901	0.0137646	-0.472579	-0.0570253	-0.125562
TTC	-0.0816799	-0.09554	-0.0466382	0.0334918	-0.104558	-0.146793	-0.0579045	-0.0557612	-0.309801	0.0603267	0.109825	-0.0263795	0.0303239	0.0987501	0.189119	-0.0276486	0.0144156		TTC	-0.127114	-0.0489637	-0.085851	-0.169817	0.00238009	-0.0860147	0.0621935	0.0431839	-0.245082	0.00886017	0.0353427	-0.0476635	-0.157619	0.0549556	0.0712315	0.0360006	-0.0294602		TTC	0.050648	-0.0780249	-0.0285475	0.0406641	-0.116972	-0.151765	-0.0863562	0.0523155	-0.209037	0.0114924	0.096682
TTG	-0.152349	-0.0685293	0.0143874	-0.118485	-0.0880466	-0.0378003	-0.16467	-0.0249872	-0.532427	-0.193385	-0.22735	-0.123835	-0.13877	0.0969512	-0.138419	-0.151023	0.183563		TTG	-0.00448183	-0.043327	0.00527366	-0.131242	0.030204	0.033843	0.0118555	-0.0507076	-0.363859	-0.200509	-0.234586	-0.113622	0.0342625	-0.0337385	-0.0507254	-0.138139	0.169009		TTG	-0.181968	-0.0763062	-0.0721602	-0.00546102	-0.0948681	-0.0771777	-0.0988059	-0.172616	-0.424159	-0.265384	-0.14277
TTT	0.118823	0.0524681	-0.0197734	0.129599	0.0672037	0.0617806	0.0133165	-0.0508643	-0.542876	-0.292913	-0.104122	-0.334481	-0.115073	-0.0633073	0.0834136	0.063566	0.201207		TTT	-0.0269211	0.0338603	0.0321737	0.00781121	-0.00252489	0.0772393	0.0904995	-0.111648	-0.473743	-0.161055	-0.16663	-0.4592	-0.146911	-0.168925	-0.0610135	0.1183	0.157548		TTT	-0.0636643	0.0951377	0.150859	0.146431	-0.0293183	-0.0774462	0.0875307	-0.0941596	-0.480873	-0.114023	0.0183052
[truncated: 60 more columns]

## Sheet: Supplemental_Figure_S16
ARTIERI S. PARADOXUS DATA FIRST FRAME																			ARTIERI S. PARADOXUS DATA SECOND FRAME																			ARTIERI S. PARADOXUS DATA THIRD FRAME
CODON	POS-8	POS-7	POS-6	POS-5	POS-4	POS-3	POS-2	POS-1	POS0	POS1	POS2	POS3	POS4	POS5	POS6	POS7	POS8		CODON	POS-8	POS-7	POS-6	POS-5	POS-4	POS-3	POS-2	POS-1	POS0	POS1	POS2	POS3	POS4	POS5	POS6	POS7	POS8		CODON	POS-8	POS-7	POS-6	POS-5	POS-4	POS-3	POS-2	POS-1	POS0	POS1	POS2
AAA	-0.0211711	-0.0131306	-0.0324143	-0.0337671	-0.0071999	-0.0127878	-0.03786	0.0453302	-0.519197	-0.133534	-0.147377	-0.0757148	0.129747	0.0826058	-0.00697294	0.0824637	-0.395385		AAA	-0.0179471	0.00807134	-0.0108696	0.00970518	-0.0344794	-0.016795	-0.0143567	-0.0586117	-0.264816	-0.0510074	0.0370034	0.0306296	0.201165	0.171822	0.152782	0.237155	0.106443		AAA	0.0123186	0.00189336	-0.00612072	-0.0338783	0.0139831	0.0125519	-0.0196813	-0.0238431	-0.441541	0.143428	0.127348
AAC	-0.0603431	-0.0926174	-0.105542	-0.0947315	-0.110403	-0.101436	-0.0779477	-0.0429611	-0.0989627	-0.0526418	-0.0587916	-0.0263981	0.252747	-0.0790645	-0.101135	-0.0474754	0.0287018		AAC	-0.0918616	-0.0674463	-0.0951695	-0.0764731	-0.0857332	-0.0861811	-0.0631324	-0.0863879	-0.602317	-0.0649426	-0.0238479	-0.0406997	0.10139	-0.0312873	-0.0530087	-0.0173075	-0.0196127		AAC	-0.0546259	-0.0914856	-0.0847657	-0.0965335	-0.108305	-0.11777	-0.103426	-0.088712	-0.041302	-0.125151	-0.100986
AAG	-0.0508947	-0.08341	-0.0911986	-0.0872311	-0.0852964	-0.094929	-0.0965034	-0.195096	-0.36259	-0.338051	-0.208466	-0.0476118	0.180321	0.0390251	-0.116374	-0.0667971	0.228519		AAG	-0.0621475	-0.100706	-0.123999	-0.112278	-0.0930162	-0.135779	-0.112744	-0.0776858	-0.661322	-0.333188	-0.0679457	-0.124434	0.0875556	0.0542665	0.000975233	-0.0194128	0.124985		AAG	-0.0848753	-0.0656528	-0.100484	-0.0852862	-0.0928322	-0.0944559	-0.115541	-0.101922	0.239838	-0.218647	0.207729
AAT	-0.00188932	-0.0229237	-0.0205766	-0.0365029	-0.0149928	-0.0272537	-0.0440602	-0.134031	-0.295336	-0.107362	-0.0459674	-0.0981929	0.266193	-0.107801	-0.0917288	0.0108427	0.107388		AAT	0.0311163	0.0309419	-0.00603752	0.0209973	0.0427962	0.0286782	0.0279078	0.0289542	-0.565696	-0.0693428	0.097536	0.0501523	0.215256	0.0409054	0.0255276	0.1287	0.197299		AAT	0.0198864	-8.55896e-05	0.0133138	0.00353078	0.00457079	-0.00359644	-0.0218637	0.00305414	0.0373729	-0.147493	0.0477724
ACA	0.0250068	0.0349734	0.0119516	0.026396	0.0242963	0.0355844	0.0594507	0.14017	-0.444048	-0.00372982	0.030757	0.0763589	0.0342752	-0.173315	-0.0307857	0.0273144	-0.140893		ACA	0.018891	0.000676431	0.0656402	0.0865573	0.0779001	0.0481132	0.0675209	0.00709483	0.642014	-0.134175	0.00201613	0.0066942	0.0628834	-0.0227786	0.0395876	0.0756705	-0.00446888		ACA	0.0478944	0.039694	0.0469426	0.0413585	0.0140877	0.032992	0.0876163	0.0604389	-0.503703	0.422641	0.109906
ACC	-0.0870064	-0.0957038	-0.0894474	-0.0837822	-0.0936367	-0.108252	-0.0386932	-0.0165541	0.110471	0.222402	0.213388	0.198168	0.132358	-0.00862829	0.156476	0.0993604	0.0709362		ACC	-0.0785265	-0.0816486	-0.0983299	-0.0664974	-0.0308734	-0.0745796	-0.0567928	-0.0808854	0.533431	0.119277	0.00112956	0.0741549	0.0995537	-0.00891355	0.068528	0.0782498	-0.0710761		ACC	-0.0949414	-0.0855181	-0.102307	-0.0718452	-0.091608	-0.0617926	-0.0579327	-0.019697	0.0939404	0.454987	0.195638
ACG	0.074445	0.100145	0.124283	0.0825213	0.145784	0.101626	0.10422	0.100883	-0.287697	0.026382	0.0173356	0.166801	0.287361	0.0494734	-0.0132745	0.0323982	0.142082		ACG	0.0452078	0.0780894	0.109304	0.129577	0.0878835	0.077054	0.130834	0.130782	0.651318	0.0731074	-0.0493359	0.0469085	0.0929928	0.0201675	0.0136604	-0.00991181	0.0364336		ACG	0.0557592	0.0980296	0.138767	0.120369	0.0965119	0.134781	0.144895	0.151043	0.420271	0.377751	0.237736
ACT	-0.0472306	-0.0672907	-0.0621847	-0.0632415	-0.0405925	-0.0534327	-0.0442298	-0.234859	-0.366361	0.0225166	0.0448025	0.0234543	0.0337642	-0.270892	0.00138759	0.00533966	0.0553062		ACT	-0.0365303	-0.0306621	-0.0410483	-0.052982	-0.0274204	-0.0595096	0.000852843	-0.0098109	0.558537	-0.0967735	-0.00336705	-0.00372958	-0.0174272	-0.175452	-0.0326152	0.0226578	0.0940152		ACT	-0.0642537	-0.0509899	-0.0448118	-0.0580205	-0.0695546	-0.0699264	-0.0361631	-0.0691624	0.114419	0.332475	0.0908955
AGA	-0.0337403	-0.0477907	-0.0456716	-0.0812995	-0.0568629	-0.0809369	-0.0688816	0.00834888	-0.529078	-0.165225	-0.100114	-0.165787	-0.0752911	0.219884	-0.0306592	-0.0395337	-0.107121		AGA	-0.0468655	-0.0678182	-0.0360884	-0.0606884	-0.0964058	-0.0714236	-0.0841675	-0.116499	-0.00722123	0.0676156	-0.0295537	-0.162232	0.0127294	0.119227	0.0240123	-0.0153715	0.0117757		AGA	-0.0643687	-0.0314673	-0.0612891	-0.0617681	-0.0988285	-0.0887374	-0.0810354	-0.103714	-0.509026	-0.201516	0.00697311
AGC	0.0307529	0.00755836	0.0267384	0.000139953	0.00944235	0.00875309	0.0330233	0.119529	0.0169189	0.0590742	0.119181	0.0620397	-0.377088	0.198167	0.0567275	-0.00252749	0.000592768		AGC	0.0625002	-0.0171905	0.0578752	0.0161768	-0.0145543	0.0603011	0.0263146	0.0213969	-0.116388	0.176461	0.00988375	0.0183168	-0.195433	0.0644137	0.0362448	0.0065836	-0.119235		AGC	0.0302199	0.00552851	0.0450808	0.0666365	0.0456121	0.0610176	0.0684978	0.0386115	0.249119	-0.121345	-0.018491
AGG	0.0923215	0.150109	0.119509	0.130082	0.14189	0.110515	0.12152	0.0772147	-0.209583	-0.167008	0.00481001	0.0400298	-0.289575	0.341436	0.0648102	-0.0295747	0.0965025		AGG	0.0836642	0.0641743	0.0287758	0.125703	0.0433947	0.104506	0.0887624	0.13465	0.34054	0.0857397	0.195846	-0.0266867	-0.0368955	0.12693	0.0352565	0.0607436	0.0517929		AGG	0.0769	0.0936683	0.149744	0.109555	0.149591	0.12954	0.117133	0.0700155	0.472023	0.00996917	0.291689
AGT	-0.00967604	0.0256937	0.00232086	0.0572209	0.0092488	0.00231166	0.0158834	-0.0622812	-0.432472	-0.135828	-0.0160516	-0.136831	-0.392274	-0.0156272	-0.143572	-0.0944249	-0.0147912		AGT	0.0544217	0.048982	0.00158085	0.0623525	0.014346	0.0478642	0.0383287	0.0302189	0.0696701	0.0978691	0.0506735	-0.0428965	-0.185616	-0.0215896	-0.0237248	-0.0641126	-0.00329963		AGT	0.0624671	0.0444821	-0.0114681	0.0446893	0.0444501	0.0435028	0.0439268	0.015222	0.143736	-0.219242	-0.0668047
ATA	0.127524	0.115789	0.112041	0.134276	0.163028	0.134844	0.139156	0.25878	-0.416922	-0.0502029	-0.00566073	0.0104832	-0.500143	-0.021601	0.0294863	0.0534524	-0.0373034		ATA	0.0834162	0.103221	0.0967871	0.0989521	0.128167	0.0920872	0.130661	0.0934282	-0.0385717	-0.137339	0.0740411	0.0207732	-0.145003	0.0479896	0.0541799	0.0962801	0.228777		ATA	0.131368	0.111652	0.121828	0.135559	0.148407	0.163085	0.143308	0.115754	-0.397506	0.322022	0.0820353
ATC	-0.058595	-0.0970038	-0.074432	-0.095217	-0.0992762	-0.0790198	-0.0595274	-0.0600776	-0.354238	-0.0253219	0.0177709	-0.0567441	-0.129727	0.0485985	-0.00576208	-0.0433668	-0.0180906		ATC	-0.0849133	-0.100668	-0.0985185	-0.0485864	-0.0729928	-0.0584934	-0.104937	-0.10045	-0.195091	-0.175484	-0.0748643	-0.0547779	-0.123989	-0.00357102	0.00648371	-0.0179233	-0.0395937		ATC	-0.0752148	-0.0787409	-0.0968481	-0.120872	-0.124326	-0.0927695	-0.109888	-0.0701554	-0.106952	0.219462	-0.149129
ATG	-0.0467547	-0.0574203	-0.0748886	-0.0325906	-0.0366901	-0.0398479	-0.0549869	-0.0496083	-0.498058	-0.276354	-0.169977	-0.0512277	-0.339084	-0.211679	-0.172726	-0.19443	0.0384194		ATG	-0.0384106	-0.0912014	-0.0767345	-0.0581066	-0.0578397	-0.0409928	-0.0661636	0.0126831	-0.10532	-0.414182	-0.0838704	-0.172827	-0.258493	-0.202838	-0.121108	-0.204593	-0.022261		ATG	-0.0641835	-0.0577139	-0.0305468	-0.0475063	-0.0668345	-0.0442066	-0.0451413	-0.0499191	0.184403	-0.0848779	0.136371
ATT	-0.0583369	-0.0965166	-0.0715863	-0.0642032	-0.0767001	-0.0625772	-0.0414233	-0.116896	-0.689401	-0.228366	-0.111136	-0.250687	-0.245433	-0.132411	-0.131312	-0.0753214	0.00122548		ATT	-0.0584155	-0.0674893	-0.0731623	-0.0770878	-0.0496468	-0.0406926	-0.0717484	0.00248823	-0.0982747	-0.349522	-0.0348693	-0.037544	-0.204972	-0.111987	-0.0708439	-0.0501626	0.126941		ATT	-0.0503112	-0.0763596	-0.0793757	-0.0831941	-0.0709685	-0.0836988	-0.0927693	-0.107597	-0.106092	0.0344141	-0.0851969
CAA	-0.0516785	-0.0654711	-0.0546751	-0.035764	-0.0085914	-0.0167334	-0.0353477	0.0601039	0.329898	-0.21529	-0.113443	0.00204367	-0.111473	-0.266451	0.0584745	0.0383834	-0.336519		CAA	-0.0201729	-0.036102	-0.0378054	-0.0363448	-0.0372005	-0.0190144	-0.00742603	-0.0512822	-0.267559	0.105135	0.124986	-0.0118516	-0.0436211	-0.119558	0.0250743	0.071199	-0.0495537		CAA	-0.0461563	-0.0435374	-0.0507006	-0.0544828	-0.0465441	-0.0429636	-0.0641836	-0.0267187	-0.379203	-0.519028	0.326311
CAC	-0.0409478	-0.00768705	0.000256966	0.0154943	-0.0120076	0.0337994	0.0339533	0.0598955	0.566397	0.0546444	0.0602167	0.188895	0.270887	-0.681093	0.143502	0.080006	0.0813198		CAC	-0.0738963	-0.0641663	-0.00724196	-0.0428092	-0.0498959	-0.0265606	-0.0325793	-0.0609994	-0.424902	0.197744	0.0956924	0.145207	0.0665558	-0.327571	-0.0104326	0.0155867	-0.0542525		CAC	-0.0288961	-0.0265197	-0.0270184	-0.0323993	-0.0101516	-0.044546	-0.0014223	0.0150579	0.0249688	-0.489655	0.244396
CAG	0.0922604	0.0812539	0.104428	0.11012	0.106459	0.138557	0.107878	0.10196	0.467694	-0.173557	-0.0703593	0.171178	0.154736	0.0349067	0.121773	0.0571691	0.296838		CAG	0.0972452	0.0886804	0.0846646	0.0814025	0.113423	0.0866336	0.0633762	0.136771	-0.309309	0.0608303	0.203126	0.128851	0.102208	0.102303	0.123838	0.0483164	0.164066		CAG	0.082142	0.122642	0.104861	0.137859	0.117433	0.125074	0.122787	0.105478	0.385939	-0.405575	0.519272
CAT	0.0642334	0.0528204	0.0347239	0.037371	0.0279885	0.042316	0.0216822	-0.0830684	0.316956	-0.196611	-0.0737689	-0.0291402	0.259165	-0.667417	0.0414711	0.0349474	0.0618917		CAT	-0.0029363	0.0540206	0.0403382	0.0312719	0.0223632	0.0628965	0.0055235	0.160542	-0.520779	0.055095	0.116347	0.0576559	0.120651	-0.270859	-0.000339577	0.101131	0.139726		CAT	0.0292881	0.0628266	0.0471938	0.0528604	0.0110795	0.0326691	0.0337723	0.0401226	0.0663214	-0.589106	0.259704
CCA	-0.0678402	-0.0593515	-0.114402	-0.0959786	-0.072998	-0.114527	-0.109823	0.0153761	0.320034	-0.182501	0.00803435	0.141908	0.630448	0.361858	0.227051	0.146076	-0.128534		CCA	-0.113386	-0.0668181	-0.0599796	-0.117948	-0.0950386	-0.0865262	-0.116816	-0.155612	0.742528	0.0781686	0.0612451	0.0506088	0.327351	0.217102	0.101763	0.0628703	-0.059349		CCA	-0.116608	-0.088144	-0.0528354	-0.095518	-0.108745	-0.0855666	-0.0942914	-0.106565	-0.580533	0.0270577	0.598004
CCC	0.103674	0.101072	0.0842351	0.122644	0.142035	0.0955228	0.0823853	0.0904456	0.885785	0.332604	0.433491	0.377303	0.829697	0.388258	0.49037	0.432002	0.408334		CCC	0.0727822	0.109544	0.0848456	0.103513	0.0966045	0.0827356	0.086293	0.101003	0.700639	0.526851	0.338728	0.286901	0.482527	0.270613	0.242221	0.282035	0.240146		CCC	0.110648	0.113006	0.111149	0.10867	0.0954309	0.130628	0.111667	0.112052	0.2232	0.29802	0.77842
CCG	0.175802	0.203474	0.217232	0.229113	0.188721	0.222177	0.197387	0.223431	0.630061	0.0158205	0.0146775	0.266261	0.591627	0.348688	0.309191	0.258614	0.252475		CCG	0.188928	0.0946991	0.149659	0.169516	0.216894	0.197814	0.141912	0.0906087	0.832583	0.300397	0.160825	0.228751	0.279532	0.153642	0.187614	0.0667755	0.157259		CCG	0.143544	0.149818	0.165219	0.199423	0.177257	0.157832	0.241094	0.192223	0.437423	0.145993	0.694622
CCT	0.0392515	0.03666	0.0318606	-0.00183332	-0.0145548	-0.0242927	-0.0533064	-0.126654	0.541321	0.0674526	0.182454	0.202136	0.872784	0.140296	0.338774	0.262118	0.191153		CCT	0.041557	0.0959548	0.053135	-0.0335873	-0.0068192	0.0173537	0.0106527	0.0785644	0.683929	0.326486	0.195674	0.135328	0.483237	0.123902	0.213839	0.196144	0.146324		CCT	-0.00520722	0.0414333	0.0322729	0.0098536	0.0244991	0.0213601	0.0119852	0.0275931	0.0752273	-0.041479	0.613228
CGA	0.353501	0.377263	0.422919	0.373524	0.431777	0.37293	0.352631	0.350621	0.510293	0.0488321	0.25579	0.0770066	-0.328036	-0.162125	0.172442	0.169825	0.00333824		CGA	0.170144	0.245454	0.222687	0.187134	0.274539	0.189295	0.171957	0.153902	0.326673	0.420469	0.120209	0.162241	-0.0416596	-0.0117277	0.16289	0.152314	0.133756		CGA	0.269712	0.36177	0.353693	0.385309	0.409445	0.461184	0.345166	0.405355	0.0991419	-0.207048	0.299139
CGC	0.0163615	0.083605	0.0962251	0.0917312	0.0929524	0.18609	0.104601	0.166787	0.615967	0.254645	0.233943	0.185359	-0.106793	0.230568	0.247492	0.195881	0.146428		CGC	0.0740897	0.117175	0.126109	0.14519	-0.00768416	0.105685	0.0900789	0.0671934	-0.0470814	0.472699	0.199141	0.058708	-0.00221989	0.0583431	0.231068	0.142811	-0.0598702		CGC	0.0603568	0.135511	0.0977181	0.130231	0.112961	0.120546	0.130676	0.0841749	0.221984	-0.318667	0.292455
CGG	0.182214	0.28015	0.334589	0.252296	0.186859	0.246032	0.237766	0.160907	0.450728	-0.0212928	0.0710024	0.0895797	0.933681	-0.38584	0.199187	0.0904332	0.293384		CGG	0.18277	0.195592	0.150851	0.245385	0.177243	0.316565	0.217011	0.199123	0.569918	0.131886	0.231022	0.03803	0.341779	-0.0218472	0.0176052	-0.028599	0.0986108		CGG	0.228382	0.183189	0.190195	0.335553	0.299825	0.195735	0.270393	0.274504	0.56964	-0.27942	0.407821
CGT	-0.00666615	-0.0467533	-0.0190568	0.00588542	0.00587621	-0.0411822	-0.0162021	-0.0434001	0.339639	-0.124761	0.00168871	-0.169184	-0.262639	-0.206931	0.00585704	-0.00461257	-0.0729785		CGT	0.00205104	-0.0421615	0.0029091	0.0406889	0.012295	0.0282573	-0.0316634	-0.0677229	0.08639	0.307709	0.0831232	-0.108386	-0.164635	-0.209526	-0.0676838	-0.0716602	-0.0577952		CGT	-0.0432002	-0.00811379	-0.0333729	-0.0808314	-0.00470032	-0.0221218	3.34765e-05	-0.056444	0.111693	-0.85359	0.231937
CTA	-0.0200376	-0.030221	-0.0406885	-0.029647	-0.0358183	0.0132443	-0.00186964	0.0972534	0.281227	-0.155164	0.043553	0.04581	-0.152964	0.0601985	0.129965	0.0388598	-0.161696		CTA	-0.00932703	-0.0598047	-0.0721465	0.00908173	-0.0160228	-0.0810423	-0.0347233	0.00895891	-0.048528	0.16427	0.113802	0.0274768	-0.0478423	0.0446797	0.120056	0.0754062	0.0253447		CTA	-0.0130457	-0.0319922	-0.0225736	-0.0346169	-0.0169287	-0.00200518	0.00699099	0.00965112	-0.608057	-0.244821	0.234768
CTC	0.0392899	0.0398774	0.0420672	0.0967118	0.0963148	0.0873019	0.102196	0.0933508	0.565633	0.235594	0.355765	0.268145	-0.203225	0.120094	0.360822	0.218403	0.227685		CTC	0.142981	0.0586821	0.0771623	0.119096	0.0879973	0.102014	0.0775805	0.0639303	0.0704625	0.299746	0.214336	0.218635	0.0184257	0.10105	0.216444	0.222331	0.174506		CTC	0.08907	0.075213	0.089714	0.0949624	0.13803	0.104767	0.0994099	0.105714	0.153623	-0.033443	0.366236
CTG	0.0595623	0.0894078	0.108357	0.0817228	0.120913	0.0971136	0.10729	0.0978717	0.447403	-0.128909	0.0469954	0.143063	-0.141273	0.144294	0.192554	0.0625308	0.162287		CTG	0.0418251	0.0671318	0.113622	0.0813533	0.0814701	0.0831673	0.0505984	0.0679278	0.0942988	0.0853403	0.200174	0.0902673	-0.0680133	0.0440966	0.126138	0.0152647	0.0883418		CTG	0.077769	0.0669674	0.0863049	0.141938	0.102255	0.103554	0.0927702	0.0966325	0.290271	-0.380023	0.449784
CTT	0.0444935	0.0266223	0.0449744	0.0337132	0.0745205	0.0662027	0.0769159	0.0538665	0.341248	-0.0493124	0.203056	0.0890253	-0.0255547	-0.04151	0.17632	0.147831	0.118143		CTT	0.0592247	0.0245984	0.0755923	0.0617056	0.0782013	0.0608914	0.0630001	0.0791592	0.133854	0.152815	0.261173	0.124279	0.0991684	-0.00197242	0.09335	0.11187	0.206929		CTT	0.0714566	0.0556605	0.103857	0.0546619	0.0789548	0.0789847	0.0536734	0.0730863	0.00671134	-0.222188	0.349552
GAA	-0.0987866	-0.100303	-0.115611	-0.118799	-0.110889	-0.130719	-0.151092	-0.0807318	-0.168976	0.1639	-0.211535	-0.125753	-0.202777	0.17118	-0.19095	-0.0420342	-0.376315		GAA	-0.0956286	-0.112701	-0.101401	-0.117735	-0.111998	-0.115518	-0.141306	-0.206989	-0.469671	-0.251864	-0.31478	-0.123796	-0.105002	0.137303	-0.0699014	0.0115135	-0.0919338		GAA	-0.103157	-0.116082	-0.110957	-0.140751	-0.165048	-0.152291	-0.147601	-0.172628	-0.59646	-0.0107132	-0.813769
GAC	-0.0437452	-0.0613231	-0.0957092	-0.104143	-0.114709	-0.133302	-0.143916	-0.0627806	0.109914	0.226098	-0.018324	-0.00981636	0.285268	0.0426784	-0.144834	-0.0921235	-0.0369431		GAC	-0.0911507	-0.122133	-0.0773395	-0.0947407	-0.118606	-0.147188	-0.095112	-0.133744	-0.896786	-0.110518	-0.251278	-0.0724275	0.0750111	-0.000372819	-0.168048	-0.0881543	-0.18552		GAC	-0.0730889	-0.0716714	-0.0825124	-0.129503	-0.123955	-0.133351	-0.150128	-0.150959	-0.084032	0.107168	-0.850097
GAG	-0.0121671	-0.0268031	-0.042375	-0.0256096	-0.0130786	-0.0348423	-0.0393107	-0.101926	0.0145384	0.217152	-0.0997419	0.0218217	0.0018265	0.307762	-0.117385	-0.0729317	0.155779		GAG	-0.0440678	0.01317	-0.010109	-0.0342597	-0.041544	-0.0627528	-0.0353002	-0.0268361	-0.64385	-0.243737	-0.135837	0.0031415	-0.0562413	0.187549	0.00263739	-0.0496438	0.048902		GAG	0.0124442	-0.00711345	-0.035908	-0.012269	-0.0566779	-0.0499389	-0.042493	-0.0506051	0.247879	-0.0245571	-0.378767
GAT	-0.0340442	-0.0520249	-0.0500865	-0.0559967	-0.0651971	-0.078901	-0.102636	-0.271438	-0.0694555	0.040323	-0.164951	-0.204266	0.244188	-0.138783	-0.226738	-0.103825	-0.00857829		GAT	-0.0228373	-0.038382	-0.0459013	-0.0472282	-0.0525246	-0.0694259	-0.0836176	-0.0775913	-0.871467	-0.29779	-0.207434	-0.135615	0.0808274	-0.0614073	-0.173701	-0.10888	-0.0156317		GAT	-0.0327943	-0.051764	-0.0439346	-0.0858581	-0.0798692	-0.0894121	-0.0826809	-0.104156	-0.0679043	-0.148852	-0.761449
GCA	0.00444275	0.0117177	0.029058	0.0340342	0.0130909	0.019204	9.93502e-05	0.123939	-0.275977	0.305952	0.0332009	0.0720238	-0.206386	0.0490005	-0.150259	-0.0227572	-0.283033		GCA	0.0121049	0.0247709	0.0385632	-0.0102325	0.033892	0.0292392	0.0196654	0.0239471	0.55831	-0.131637	-0.174233	-0.00918694	-0.0709733	0.00676623	-0.10767	-0.0426649	-0.131251		GCA	0.0273545	0.00829722	0.0283172	0.0417054	0.0285693	0.0361916	0.0116137	0.036821	-0.46674	0.556587	-0.311418
GCC	-0.125755	-0.0763476	-0.112605	-0.0949852	-0.108729	-0.106783	-0.131665	-0.0375199	0.131042	0.449142	0.154682	0.0976059	0.0781822	0.10423	-0.0716911	-0.0424336	-0.038989		GCC	-0.0765787	-0.101176	-0.130039	-0.0408375	-0.0767955	-0.0978956	-0.0865425	-0.0597915	0.434964	0.123135	-0.2367	0.00502337	0.0323479	0.00389349	-0.0940291	-0.0251737	-0.191169		GCC	-0.122797	-0.104508	-0.126967	-0.119375	-0.126917	-0.135482	-0.109307	-0.073217	0.115514	0.758724	-0.558559
GCG	0.0236925	0.130338	0.0794654	0.103464	0.0615499	0.0907234	0.0901057	0.0662763	-0.0182235	0.345364	0.0616577	0.170003	-0.310296	-0.0997789	-0.130831	-0.010003	0.0969903		GCG	0.0330318	0.156031	0.0298358	0.0961644	0.0682348	0.0714062	0.104079	0.1312	0.601874	-0.0775813	-0.0641503	0.00748306	-0.0859773	-0.0942767	-0.112037	-0.0670371	-0.0512364		GCG	0.117581	0.0596754	0.0837913	0.0812477	0.145175	0.105036	0.104948	0.139163	0.456509	0.54445	-0.0843799
GCT	-0.101856	-0.139844	-0.126499	-0.123161	-0.13636	-0.12042	-0.126905	-0.273882	-0.198813	0.336188	0.0665867	-0.0389247	0.0743876	-0.0541246	-0.151009	-0.0442524	-0.0621712		GCT	-0.102953	-0.120101	-0.130336	-0.141651	-0.0736605	-0.128672	-0.135031	-0.0766168	0.354371	-0.166721	-0.170321	-0.102804	-0.0269189	-0.190349	-0.153431	-0.0920783	-0.137916		GCT	-0.114189	-0.128735	-0.170583	-0.133167	-0.135663	-0.147048	-0.157076	-0.154349	0.0597251	0.592667	-0.523921
GGA	0.0285675	0.0540871	0.0270863	0.0323971	-0.0208771	0.0175212	0.0237856	0.100587	-0.0277122	0.189667	-0.00463633	-0.0457631	0.232424	0.247471	-0.0790685	-0.0422947	-0.206486		GGA	0.0423487	0.0570849	0.0724604	-0.0041051	0.0132043	0.0249393	0.0111961	-0.0329319	0.106775	-0.000825382	-0.0547966	-0.0688975	0.161682	0.139444	-0.0165718	-0.00105037	-0.141972		GGA	0.0277051	0.0485039	-0.00621386	0.0494417	-0.0092232	-0.0189908	0.0137722	0.03871	-0.36329	0.125642	-0.593249
GGC	-0.0104666	-0.0378383	-0.0482634	-0.0613727	-0.0198411	-0.0381693	-0.0257266	0.123627	0.186001	0.335902	0.169845	0.0546481	0.118811	0.352228	-0.055901	-0.04882	-0.0670456		GGC	-0.0297657	0.00951009	-0.0282066	-0.0361033	-0.0359637	-0.0360946	-0.038985	-0.039771	-0.24425	0.143484	-0.0677052	-0.00213772	0.026583	0.198565	-0.0308058	-0.0606802	-0.193362		GGC	-0.024083	-0.0321561	-0.0300327	-0.0748104	-0.0168895	-0.0513471	-0.0612563	-0.0666014	0.168146	0.19738	-0.663031
GGG	0.0363571	0.0489178	0.0350413	0.0569945	0.0548295	0.0419096	0.00866635	0.0132725	0.0362961	0.279489	0.060877	0.180095	0.136125	0.405646	-0.0246305	-0.00514097	0.0579033		GGG	0.0543405	0.0272722	0.113692	0.0127532	0.135134	0.0734309	0.0583989	0.0628824	0.335688	-0.00927156	0.0560496	0.0742895	0.109595	0.240078	-0.0510407	-0.0894952	-0.0479431		GGG	0.0258624	0.0407989	0.0775511	0.0663501	0.0406271	0.0548988	0.0589621	0.0255131	0.345171	0.260072	-0.325158
GGT	-0.119851	-0.121281	-0.117811	-0.13303	-0.150049	-0.132402	-0.120127	-0.237245	-0.166267	0.0546934	-0.163568	-0.295934	0.00373515	-0.0389619	-0.333185	-0.271702	-0.244937		GGT	-0.112606	-0.115589	-0.103141	-0.11876	-0.130202	-0.113423	-0.104737	-0.10819	-0.305062	-0.0576526	-0.219782	-0.175208	-0.0974425	-0.101435	-0.283403	-0.263963	-0.30254		GGT	-0.137266	-0.140831	-0.127891	-0.142867	-0.177393	-0.162888	-0.172342	-0.194599	-0.0111093	-0.148168	-0.909365
GTA	0.0621726	0.0378833	0.080456	0.0623381	0.0598803	0.0219614	0.0476381	0.192223	-0.0369994	0.173585	-0.0736473	-0.170446	-0.466253	-0.00501635	-0.192376	-0.0464099	-0.2336		GTA	0.048906	0.0145663	0.0585453	0.00583469	0.0578453	0.00198722	0.0195501	-0.0110238	-0.101088	-0.144533	-0.127995	-0.0768339	-0.282909	-0.00543019	-0.0694443	-0.0857767	-0.0477846		GTA	0.0456652	0.0208885	0.0642864	0.0556036	0.0496767	0.0620105	0.0895135	0.0693519	-0.47863	0.0217419	-0.437441
GTC	-0.103593	-0.0883598	-0.0906186	-0.106925	-0.112739	-0.106074	-0.0619963	-0.0412047	0.081067	0.262919	0.0328126	-0.142946	-0.349944	-0.0434085	-0.213931	-0.103144	-0.144309		GTC	-0.108779	-0.0535454	-0.124081	-0.110793	-0.0831274	-0.129399	-0.064623	-0.115575	-0.356119	-0.195893	-0.166072	-0.133017	-0.24423	-0.167972	-0.158751	-0.16385	-0.277046		GTC	-0.100645	-0.128355	-0.117119	-0.135781	-0.139646	-0.0993604	-0.141499	-0.127173	-0.204741	0.0227992	-0.779549
GTG	0.0474796	0.0549037	0.0540737	0.0397214	0.0789848	0.0687296	0.058002	0.0768943	0.0411551	0.128149	-0.0500237	-0.176014	-0.270503	-0.0591421	-0.244251	-0.172396	0.0180466		GTG	0.049929	0.0770219	0.0571062	-0.0100162	-0.000895645	0.0819097	0.0616522	0.045914	0.00759872	-0.261708	-0.19694	-0.0939633	-0.123085	-0.0749181	-0.139479	-0.207443	-0.00544021		GTG	0.0117541	0.0433607	0.032012	0.044373	0.00537388	0.0322126	0.0377487	0.0540829	0.311871	-0.263754	-0.272895
GTT	-0.0964651	-0.104619	-0.0970592	-0.096528	-0.0867777	-0.0855942	-0.0681739	-0.151843	-0.105733	0.0774371	-0.0834209	-0.321132	-0.434038	-0.209349	-0.33215	-0.159176	-0.127349		GTT	-0.0697941	-0.0905963	-0.0841007	-0.0658568	-0.0791482	-0.038075	-0.0684602	-0.0485595	-0.179942	-0.314475	-0.195077	-0.167342	-0.317624	-0.233358	-0.275244	-0.17835	-0.105845		GTT	-0.104297	-0.115977	-0.104435	-0.100774	-0.127391	-0.118581	-0.13533	-0.118533	-0.114447	-0.216667	-0.651008
TAC	-0.0678067	-0.108099	-0.114374	-0.0850329	-0.131791	-0.117329	-0.0618679	-0.0362428	0.104424	-0.221122	-0.124746	-0.0601984	-0.182395	0.169412	-0.0531437	-0.123753	-0.0738451		TAC	-0.0343657	-0.0964933	-0.0723559	-0.11903	-0.0657103	-0.0854728	-0.0791971	-0.0883282	-0.75245	-0.119089	-0.151068	-0.00773427	-0.219402	0.0725305	-0.0364813	-0.111425	-0.125334		TAC	-0.127511	-0.0807253	-0.11381	-0.132102	-0.104417	-0.149155	-0.0868107	-0.0851353	-0.0573588	-0.148755	-0.135177
TAT	0.0316279	-0.00635525	-0.0102519	-0.00108426	0.000129809	0.0180161	-0.0135001	-0.113939	-0.150166	-0.231819	-0.17118	-0.187389	-0.141892	0.0830797	-0.101913	-0.0413567	0.0651125		TAT	0.0732834	0.00572407	0.0814984	0.0297653	0.0200577	-0.00216771	0.0352208	0.055186	-0.775336	-0.105472	-0.0234697	0.0106764	-0.0953358	0.0908935	-0.04517	0.0439189	0.131161		TAT	0.0422115	0.0279328	0.0106277	4.31155e-05	0.0335766	0.0247859	0.00861157	0.00669534	0.0635119	-0.139857	-0.0157999
TCA	0.0475748	0.0439172	0.0407442	0.0211592	0.0310153	0.0098939	0.0540134	0.116188	-0.314579	-0.0993209	0.00581605	0.0689578	-0.0979198	0.128735	0.073591	0.0780843	-0.0653557		TCA	0.0135915	0.067733	0.0514041	0.0370742	0.0735493	0.0163519	0.102559	-0.0489019	0.537688	-0.0161104	0.0647376	0.03407	0.0922264	0.137655	0.123973	0.145759	0.0666682		TCA	0.0608982	0.0204016	0.0442292	0.0575055	0.0523162	0.050766	0.085301	0.0529537	-0.51043	0.360437	0.236403
TCC	-0.0764223	-0.102853	-0.0849498	-0.0784571	-0.0999039	-0.0866996	-0.124622	-0.128323	0.31723	0.146359	0.244932	0.221157	0.159471	0.393734	0.313007	0.18297	0.174919		TCC	-0.0620344	-0.0799905	-0.0383999	-0.0243699	-0.0101329	-0.0463575	-0.0623304	-0.0440651	0.469625	0.141165	0.106562	0.134805	0.157057	0.210066	0.199437	0.125701	0.0247142		TCC	-0.0837833	-0.0419085	-0.0763296	-0.0744627	-0.0649579	-0.0744947	-0.108962	-0.0551429	-0.043681	0.378402	0.33386
TCG	0.0989845	0.0917344	0.111611	0.125205	0.0955904	0.0765432	0.113514	0.0674589	-0.0684864	-0.137505	-0.0617479	0.114215	-0.151538	0.151721	0.113851	0.027391	0.143823		TCG	0.110626	0.108242	0.0711075	0.0861227	0.0515752	0.0769751	0.113421	0.144444	0.53447	0.0723096	0.0629016	0.0441549	-0.0113479	0.112645	0.106464	0.0748732	0.0263158		TCG	0.110125	0.116794	0.131686	0.0881039	0.21588	0.126795	0.155338	0.0865081	0.35493	0.388005	0.341433
TCT	-0.0302223	-0.0675637	-0.0763046	-0.078702	-0.0739324	-0.0627778	-0.0588919	-0.26306	-0.111243	-0.0390378	0.0429565	0.0220582	0.0450418	0.116928	0.122598	0.0796666	0.0764065		TCT	-0.0180885	-0.0549172	-0.0671748	-0.0721791	-0.0550952	-0.0664549	-0.012506	-0.0292836	0.392561	-0.0421664	0.0946345	0.0160781	0.104758	0.0601084	0.0924374	0.0977609	0.0427165		TCT	-0.052039	-0.0298618	-0.0681618	-0.0576154	-0.0832553	-0.0848855	-0.0630005	-0.0558658	-0.0235246	0.233328	0.218623
TGC	-0.0412382	0.0104201	-0.0233958	-0.01762	-0.0100411	0.0347241	-0.00986714	0.123419	0.0741397	0.104835	0.0363729	-0.0758657	0.192439	-0.0891001	-0.0342749	-0.0870709	-0.0972598		TGC	0.0311603	0.0793831	-0.0391946	0.0264916	-0.00556999	-0.00875678	0.0478092	0.0235338	-0.322406	0.174289	-0.00157121	0.025255	0.0103017	-0.0564766	-0.0358492	-0.146397	-0.168558		TGC	0.0506301	-0.000235722	0.0386038	-0.0141751	0.00396919	0.000360604	-0.0773658	0.0179194	0.202901	-0.083377	0.0799908
TGG	0.012848	0.0315724	0.0459743	0.0291772	0.00950572	0.0127744	0.0177089	0.022005	-0.10824	-0.352451	-0.299125	-0.0914	-0.378561	-0.322303	-0.056837	-0.208317	-0.06674		TGG	-0.0445808	-0.0159396	-0.00171584	-0.0160148	-0.0384894	-0.00580939	-0.0646435	0.0462054	0.0344468	-0.0950202	-0.0931031	-0.114087	-0.303952	-0.214196	-0.115207	-0.162333	-0.113591		TGG	-0.000229957	-0.00853235	-0.0186432	0.0152478	0.0176569	0.0421219	0.0275674	0.00763257	0.391896	-0.136596	0.184955
TGT	-0.0742528	-0.0758396	-0.0503176	-0.0622	-0.0523367	-0.0630409	-0.0794738	-0.110125	-0.350094	-0.286226	-0.220808	-0.349519	0.120624	-0.640912	-0.213554	-0.269194	-0.174924		TGT	-0.110439	0.0168133	-0.0574258	-0.0615764	-0.0523939	-0.0172238	-0.0288282	-0.0193596	-0.237451	-0.0788062	-0.104943	-0.135971	-0.0486292	-0.357635	-0.200266	-0.168392	-0.182562		TGT	-0.0577877	-0.114994	-0.123554	-0.0716714	-0.086309	-0.0470709	-0.0945462	-0.0733493	0.0127515	-0.281307	-0.0635628
TTA	-0.0307884	-0.0370263	-0.0374513	-0.0438847	-0.0684853	-0.0482126	-0.0162704	0.0915291	-0.451456	-0.24302	-0.104788	-0.104371	-0.290082	-0.0801692	-0.0718699	-0.0649689	-0.109235		TTA	-0.0178627	-0.0276609	-0.00125025	-0.02165	0.00806944	-0.0181721	-0.0144901	-0.0492621	-0.251275	-0.0999684	-0.0591392	-0.0617516	-0.126973	-0.0628513	-0.0104708	0.00753059	0.123925		TTA	-0.0331202	-0.031286	-0.0178819	-0.0301628	-0.0265381	-0.00835916	-0.0253877	-0.0114278	-0.63215	0.0276745	-0.0431585
TTC	-0.0703441	-0.0894378	-0.09232	-0.107777	-0.119698	-0.082407	-0.0596866	-0.0934641	-0.0758438	-0.0410342	0.042702	-0.0353644	-0.0343308	0.00225264	0.104248	0.0273524	0.0266633		TTC	-0.0762757	-0.098321	-0.0956611	-0.0900632	-0.125048	-0.0758287	-0.0507805	-0.109292	-0.288411	0.0657334	-0.0293725	0.0223018	-0.0282276	0.0225232	0.043931	0.00924769	-0.0242488		TTC	-0.0706093	-0.0925569	-0.102874	-0.120681	-0.0907085	-0.127496	-0.103069	-0.0890783	-0.15402	0.144326	-0.0341475
TTG	-0.0978234	-0.128091	-0.121415	-0.130097	-0.0940617	-0.124338	-0.109652	-0.168221	-0.358524	-0.394144	-0.236553	-0.114268	-0.275715	-0.105593	-0.171673	-0.246996	-0.0376667		TTG	-0.0881184	-0.101785	-0.108192	-0.115985	-0.112578	-0.122662	-0.118806	-0.0471493	-0.296057	-0.31213	-0.129591	-0.154213	-0.222332	-0.125833	-0.155448	-0.220682	-0.11478		TTG	-0.0957259	-0.112178	-0.125335	-0.112582	-0.130907	-0.117875	-0.123519	-0.120745	0.141798	-0.228574	0.0732239
TTT	-0.0160045	-0.0146671	-0.0180401	-0.0242594	-0.0175658	0.00230006	-0.0254329	-0.10211	-0.272747	-0.200414	-0.101244	-0.190745	-0.0791136	-0.21538	-0.0446703	-0.020549	0.039503		TTT	0.0191255	-0.0197975	0.0374049	0.0170105	0.028026	0.0167882	0.0198274	0.0365153	-0.140358	-0.0669016	-0.0296058	0.0432009	-0.042926	-0.0934797	-0.00581195	0.0461228	0.198157		TTT	0.00759689	-0.00384635	-0.0012985	-0.0272797	-0.0211119	-0.0228008	0.00654098	-0.00312019	-0.0114369	0.0258688	-0.04172
[truncated: 60 more columns]

## Sheet: Supplemental_Figure_S23
ARRESTED L1 DATA FIRST FRAME																			ARRESTED L1 DATA SECOND FRAME																			ARRESTED L1 DATA THIRD FRAME
CODON	POS-8	POS-7	POS-6	POS-5	POS-4	POS-3	POS-2	POS-1	POS0	POS1	POS2	POS3	POS4	POS5	POS6	POS7	POS8		CODON	POS-8	POS-7	POS-6	POS-5	POS-4	POS-3	POS-2	POS-1	POS0	POS1	POS2	POS3	POS4	POS5	POS6	POS7	POS8		CODON	POS-8	POS-7	POS-6	POS-5	POS-4	POS-3	POS-2	POS-1	POS0	POS1	POS2
AAA	0.0283715	0.0256087	0.0733841	0.0484668	0.0617967	0.0373131	0.0165101	0.144013	-0.198255	0.194852	-0.0505618	0.0961162	0.055078	-0.0465067	-0.0669834	0.0579065	0.0814338		AAA	0.0306293	0.00710415	-0.00109817	0.053061	0.0124993	0.0532361	0.037063	-0.00898518	0.167094	0.013201	0.0328602	0.0120138	0.0770648	0.00240678	-0.0205011	0.00524466	-0.0164292		AAA	0.0245932	0.0465486	0.0420417	-0.00753717	0.044433	0.0170758	0.0585767	0.00788488	-0.00429622	0.23567	0.0947249
AAC	-0.0194072	0.00326763	-0.035306	-0.0289173	0.0223887	0.028107	-0.027795	0.0476797	0.282307	0.105309	-0.0891164	-0.0228939	-0.114676	0.0316915	-0.188628	-0.0750061	-0.0923459		AAC	-0.036785	-0.00660193	-0.0513749	-0.0538875	-0.0506478	-0.0233466	-0.0271692	-0.0599698	-0.18925	-0.203572	0.0615949	-0.0436097	-0.133785	-0.0653741	-0.0752531	-0.0746064	-0.159212		AAC	-0.0773649	0.00546394	-0.0336244	0.0211692	0.00485067	-0.0464241	-0.0259771	0.0211768	0.087758	0.30106	-0.0193519
AAG	-0.005111	0.00451373	0.0396186	0.0285138	0.0191301	0.0456645	0.00750607	0.000731973	0.378488	0.0601337	-0.00268923	0.109183	-0.135966	0.0913623	-0.107067	0.0817824	-0.0178407		AAG	0.0157753	0.0353185	0.0117424	-0.0239167	-0.0255072	0.0306223	-0.0248537	0.0465309	0.22988	-0.211432	0.074527	-0.0769529	-0.152522	0.0239581	-0.0388237	0.0246797	-0.0617142		AAG	-0.00744528	0.0265885	-0.00827524	0.0325236	0.0160021	0.0416369	-0.00769248	-0.0405388	-0.0629813	0.372951	0.228951
AAT	-0.0131974	-0.0140444	0.0348084	0.0213163	-0.00042475	-0.00343003	0.0415193	-0.118382	0.171553	0.0990508	0.0145307	0.000923474	0.186543	0.173999	-0.0294821	0.0648556	-0.170115		AAT	0.023788	-0.028218	0.0230722	-0.0392531	-0.00439772	0.00943135	0.0416519	0.0237068	0.0741125	0.000507785	0.119467	0.0330159	0.0539743	0.047189	-0.000343348	0.00850625	-0.0265748		AAT	-0.00583961	0.0334418	0.0107462	0.00164566	0.0020053	0.0227518	-0.0181401	0.0179323	0.0922856	0.167476	0.0716495
ACA	-0.0279542	-0.0214831	-0.0106531	0.0254874	0.00977326	-0.00601722	-0.0375691	0.10913	0.00630726	-0.02424	-0.115745	0.0207662	-0.00517912	-0.200222	-0.0276897	-0.013019	0.0303203		ACA	-0.0130832	-0.0485164	-0.0281025	-0.00956461	0.020029	-0.0381362	0.0517439	-0.0221836	0.55918	-0.100926	-0.122126	-0.0214648	0.00602757	-0.0796662	-0.115859	0.00963177	-0.0968946		ACA	-0.0115252	-0.0289406	-0.0763069	-0.00311822	0.0219759	0.0700421	-0.00144098	-0.00611951	-0.088205	0.05899	0.0612468
ACC	-0.00465274	-0.0160278	-0.0175267	-0.0351813	-0.0628165	-0.0515569	-0.0388044	0.044534	-0.133291	-0.298109	-0.126598	-0.17978	-0.0909443	-0.0364224	-0.15556	-0.179965	-0.0908084		ACC	0.000349526	-0.0146074	0.0687938	-0.000775261	-0.00285391	-0.014108	0.00457543	-0.0531742	0.173668	-0.300023	-0.17791	-0.0747067	-0.0877839	-0.0859616	-0.0745398	-0.153906	-0.151172		ACC	0.0286365	-0.0290339	0.00493955	-0.0210953	-0.0248408	-0.0237458	-0.072233	0.0128058	0.20887	0.108315	-0.0654641
ACG	-0.0157589	0.0573731	0.0317582	0.0546116	-0.0124589	0.0237322	-0.0353796	-0.0608773	0.117367	0.0390883	0.100183	0.012768	0.132828	0.0700884	0.0026359	0.108348	0.117487		ACG	-0.0223415	0.0998944	0.0203122	0.11969	0.0621109	0.0665016	-0.0449967	0.0198329	0.473096	0.0479424	-0.04793	-0.00569858	-0.125502	-0.0921859	-0.0528183	0.0100226	0.0846243		ACG	0.0477294	-0.00548853	-0.0746439	0.152706	0.133172	-0.040928	0.035	-0.022711	-0.157317	0.128318	0.0654293
ACT	-0.0416728	-0.0698884	-0.00766641	0.0465388	-0.00327996	-0.000684946	-0.0330768	-0.126619	0.0785051	-0.13295	-0.0853631	-0.121003	0.0288691	-0.0977641	-0.134806	-0.076423	-0.0742131		ACT	-0.00997124	-0.0455298	-0.0364426	-0.0438895	-0.0700238	0.0251346	-0.064892	0.0228698	0.384499	0.24048	-0.0426208	0.00719897	-0.0276308	-0.0763334	-0.0672007	-0.062656	-0.0327082		ACT	-0.0252778	0.0433994	-0.0401407	-0.0240482	-0.025837	-0.035169	-0.0107598	-0.036916	0.0725405	-0.122452	0.0717648
AGA	0.022991	0.00941692	0.0103028	-0.00139223	0.00240231	0.0279579	0.00174849	0.119162	0.356596	0.0826813	-0.0109096	0.013012	-0.0922616	0.102578	0.0588935	0.0872795	0.142108		AGA	0.0326282	0.0557468	0.0295289	0.0474914	0.024413	0.0275277	-0.0399201	-0.0888327	0.0622469	0.30784	0.042094	-0.13512	0.000266545	0.166076	-0.0136762	0.0511215	0.0504196		AGA	0.0464455	-0.00258068	-0.081255	-0.00478525	-0.0431344	0.0151757	0.0905976	0.0365487	-0.0810171	-0.0370575	0.182991
AGC	0.012562	-0.0536563	0.0211522	-0.0135802	-0.00903042	-0.0145209	-0.00415672	0.0881317	0.219951	-0.0984272	0.0793896	-0.0128013	0.0492972	-0.236875	-0.0154229	-0.106709	0.101294		AGC	-0.0842813	0.103283	-0.0312892	-0.113113	0.111004	0.0277552	-0.00864809	0.0228062	-0.505447	-0.0352131	0.12136	-0.0570844	-0.0187275	-0.236628	0.0197214	0.0104273	-0.0354791		AGC	-0.0653722	0.0513136	0.0148943	-0.0189167	0.00296104	-0.0522062	-0.0288867	0.0486841	0.13654	-0.113589	-0.00354765
AGG	0.0596739	-0.0399358	-0.073778	0.0125307	0.0936766	0.106656	0.00115283	-0.0260802	0.228046	0.0958906	0.0948709	-0.0159935	0.163361	0.158628	0.0796828	0.165876	0.0907389		AGG	0.0189021	0.191665	0.0850852	0.0104857	0.0327555	-0.0671277	0.403773	-0.142262	-0.221431	0.0275918	0.0940545	-0.139985	0.0451781	-0.025073	0.0791625	0.0300306	0.224477		AGG	-0.100254	-0.0403752	0.086698	0.00430918	0.170582	0.0505931	0.018392	0.025221	0.0401332	0.309399	0.0777352
AGT	-0.023598	0.0123266	0.0198715	-0.0477765	-0.015152	0.0049041	-0.00123101	-0.0979986	0.234926	-0.0590516	0.143927	-0.00951635	0.213179	-0.0637197	-0.011771	0.0701371	0.0180517		AGT	0.00350473	0.049648	0.0533185	0.0272757	0.0118225	0.060303	-0.0696525	0.0158283	0.159769	0.159329	0.127	0.0894305	0.145213	-0.0144989	0.0155352	0.109643	0.0159914		AGT	0.0757325	0.0276475	-0.0139294	0.0161864	0.0103418	0.0188641	-0.0292848	-0.0229507	0.177532	-0.0950931	0.0477178
ATA	0.0762443	0.0846584	0.13607	0.023407	0.0751728	0.11776	0.1399	0.159821	0.21433	0.172778	0.153737	0.105057	-0.0567888	0.182831	-0.0135662	-0.0445154	0.167389		ATA	0.13579	0.0282501	-0.0123874	-0.00539653	-0.0460303	0.11435	-0.0857255	-0.0524766	0.218403	0.0519532	0.0465749	-0.00293801	-0.050977	0.116159	-0.0330594	-0.106161	0.116497		ATA	0.0939008	-0.0308365	0.0479253	0.121529	0.0951428	0.0761168	0.123008	0.0312104	-0.0548274	0.233075	0.119272
ATC	0.0066307	-0.03402	-0.0179553	-0.0372762	-0.00882848	-0.0396874	-0.0082249	0.065153	0.07341	0.045584	0.123575	-0.119794	-0.18907	0.0300762	-0.0963114	-0.0767115	-0.0696654		ATC	-0.079642	-0.00707498	-0.0328602	-0.0201919	0.0177445	0.0336809	-0.0173776	-0.0309183	-0.180228	-0.110934	0.0906999	0.0569396	-0.142262	-0.0604831	-0.0151148	-0.093724	-0.0863295		ATC	0.012486	-0.0544228	-0.0353951	-0.043161	-0.107922	-0.0541964	-0.000943353	-0.0108413	-0.0120582	0.382305	-0.0684565
ATG	0.000576991	0.011077	-0.00207931	-0.00144307	-0.00276504	0.0075401	0.0399042	0.0542093	0.27445	0.116321	0.146615	0.0884083	-0.0104279	0.24482	0.0144075	0.110144	0.13701		ATG	0.0546586	-0.0108796	0.0281096	-0.0134334	-0.00913351	-0.00900302	-0.0105896	0.0655305	-0.048557	-0.0746043	0.081563	0.0887936	-0.0908048	0.131295	0.0967931	0.0669675	0.0447534		ATG	0.0065645	-0.0245427	-0.0177809	-0.0501978	0.0169842	0.0336483	-0.0367569	-0.0311246	-0.177292	0.163628	0.198719
ATT	-0.0100129	-0.031334	-0.0234567	0.00559814	0.00487033	0.0165206	-0.010513	-0.08492	0.258114	0.136928	0.178767	-0.180095	-0.0818506	0.21156	0.0253795	0.0353846	0.00951817		ATT	-0.0350739	-0.00671418	0.00707089	0.0454741	0.0417395	0.0231688	0.0437146	0.0155021	0.0220116	0.0107266	0.200407	0.0295146	-0.0620926	0.104669	0.0256872	0.0228322	0.0164312		ATT	-0.00858434	-0.0052577	-0.037617	-0.0620339	-0.0217463	-0.0188885	0.0117915	-0.0148991	0.050761	0.103965	0.110056
CAA	-0.0100732	-0.0251646	-0.0616566	-0.0202319	-0.015066	-0.00859345	0.00364361	0.0750598	0.346422	-0.0282092	-0.288953	0.0613551	-0.126507	-0.303462	-0.0221163	-0.0459998	-0.0320697		CAA	-0.0282024	0.0356683	-0.0632436	-0.0333336	-0.0157403	-0.0319526	-0.0185074	-0.0517092	0.149822	0.0890902	-0.0874854	-0.0345666	-0.0946511	-0.0821973	-0.0172983	-0.0491501	-0.127194		CAA	-0.0122799	0.0211865	-0.0102839	-0.00874682	-0.0281664	-0.0155374	-0.0309346	-0.0405321	-0.114916	-0.351275	-0.0289284
CAC	-0.00719233	0.00863227	0.0461005	0.00682189	0.062877	-0.0220075	0.0510489	0.0614271	0.338456	-0.157312	-0.21711	0.0578826	-0.278727	-0.0951547	0.0128595	-0.0552462	-0.194458		CAC	0.0456611	0.0238589	0.112599	0.0209473	0.0810593	0.00863089	0.0248969	0.00272817	-0.180607	-0.284806	-0.0933891	-0.0154241	-0.199267	-0.135492	0.0188402	-0.0943055	-0.132743		CAC	0.0186824	-0.0341102	-0.00364326	-0.0116443	0.0273914	0.0580602	0.0592948	0.0391813	0.217334	0.154244	-0.179013
CAG	-0.0463076	0.00470699	-0.0130344	0.0104132	0.061583	0.0281191	-0.0140962	-0.0646655	0.302389	-0.00630021	-0.244308	0.0977365	-0.00246185	-0.276958	0.0241563	0.00490463	-0.160847		CAG	0.054712	0.0131946	0.0605243	0.0355007	0.0260606	-0.0096182	-0.01596	0.135735	0.192328	-0.113874	-0.161013	-0.0169662	-0.0361475	-0.150249	0.0311037	-0.00330035	-0.100224		CAG	-0.0794128	-0.00124029	-0.0134788	-0.0784896	-0.00101229	0.0489171	0.00743568	-0.044202	-0.133941	-0.202814	0.0584957
CAT	-0.0159	0.027645	0.0130431	-0.00549747	-0.0584602	0.00903262	0.0351873	-0.124593	0.231349	-0.168748	-0.147905	0.0256377	0.0158777	-0.0380242	0.037097	-0.0257505	-0.13898		CAT	0.0161848	-0.00231188	0.0182563	0.00511679	0.0166588	-0.0262757	-0.0243408	0.0267543	0.0340218	-0.00115296	0.0120205	0.0508329	-0.00952262	-0.00581367	0.0109758	-0.0656366	0.0178483		CAT	0.0395911	0.0456835	-0.0130158	0.00724934	0.0288994	-0.0211484	-0.0306613	-0.000222863	0.0975476	-0.238105	0.0895343
CCA	-0.0110306	-0.0190639	-0.0600721	-0.0217579	-0.069389	-0.00120284	-0.0296127	0.0598879	-0.020394	-0.593992	-0.279956	-0.103299	0.0147869	-0.0364571	-0.0641423	-0.157017	-0.241805		CCA	0.00164086	-0.0219624	-0.0215461	0.00224019	-0.00207138	0.030291	0.00253732	-0.000534987	0.710055	0.0917137	-0.154336	-0.0618853	0.0153351	-0.0133914	-0.0564001	-0.0833269	-0.103857		CCA	-0.0209381	-0.00785592	-0.0403453	-0.0418851	-0.00642429	-0.0335317	-0.0501395	0.00196909	-0.161626	-0.433341	-0.076093
CCC	-0.0552851	0.0458626	0.00756027	-0.00813296	0.00114767	-0.060502	-0.0192866	0.1254	-0.0810475	-0.437903	-0.0331159	-0.189068	0.0935875	-0.0566105	-0.064271	-0.139397	-0.276053		CCC	0.162513	0.00255175	0.0862726	0.0508294	-0.0580262	-0.0922854	0.0495773	-0.0499103	0.0352917	-0.170757	-0.173849	0.00240517	0.0672394	-0.210621	-0.110596	0.0612381	-0.132737		CCC	0.0830136	0.0430472	0.0707922	0.053221	0.126913	0.0706025	0.13615	0.00550937	-0.039701	-0.200575	-0.129755
CCG	0.0263179	-0.0138797	-0.0229438	0.0136907	0.000968452	-0.00160785	-0.00454098	-0.0301685	0.0485832	-0.327561	-0.11362	-0.0342294	0.202267	0.0398612	0.00496537	0.0349868	-0.0622663		CCG	-0.0284143	-0.0388495	0.0225252	-0.0756903	0.0283319	-0.0889284	-0.0243774	0.0901091	0.428352	-0.0440222	-0.0908619	-0.107188	0.0393881	0.0898649	0.0379112	-0.0488118	-0.0984269		CCG	0.0502152	0.0257513	0.107342	-0.000294923	-0.0414093	0.087351	-0.0559473	-0.0136109	-0.12502	-0.225042	0.0475053
CCT	0.0278165	0.125774	-0.0286344	0.109865	0.0120096	0.00782146	0.026655	-0.161896	-0.149142	-0.408567	-0.121096	-0.0857622	0.10708	-0.143464	-0.0146315	-0.139458	-0.276912		CCT	-0.0208747	-0.0365996	0.0678932	0.0205685	0.00286518	-0.00592031	0.0626645	0.0404561	0.208825	-0.00585362	-0.0575983	-0.0364011	0.0622688	0.0742471	-0.0709875	-0.271796	0.0140669		CCT	0.00597288	-0.0453089	0.0751433	0.0311949	0.0925864	0.027477	0.107217	-0.0484141	0.095672	-0.30533	-0.0368761
CGA	0.0257313	0.11849	0.0915285	0.0334622	0.0781601	0.0210963	0.0095443	0.11784	0.22704	-0.199745	-0.00605385	0.0835727	0.0158807	-0.099664	0.137006	0.084306	0.0713819		CGA	-0.0223676	-0.00662178	0.0396627	0.0836317	-0.0387906	0.0532824	0.0438188	-0.0891375	0.138035	0.266995	0.0792344	-0.0224544	-0.0251623	0.0411618	-0.00412349	0.0364087	-0.0241692		CGA	0.0769247	-0.0281861	0.0777884	0.0765916	-0.0465551	0.0367467	0.0211674	0.0236238	-0.0222807	-0.175285	0.0816219
CGC	0.112784	-0.0184442	-0.0638406	-0.00615884	0.0715729	-0.0671102	0.000622488	0.118083	0.229074	-0.40667	0.000621908	-0.0493795	-0.225364	0.0226707	0.0681532	-0.223654	-0.0746397		CGC	0.00216096	0.00160255	-0.0293108	-0.0314314	-0.0115461	-0.0422165	0.0259159	-0.029435	-0.472903	0.158831	-0.00775424	0.0368484	-0.0439437	-0.0821234	-0.0242006	-0.0748466	-0.0306774		CGC	0.0430822	0.0530379	0.0326732	0.0589628	-0.0156159	-0.151136	-0.042787	0.0238235	0.185777	-0.447734	-0.20559
CGG	0.144459	0.157602	0.0946632	0.0521894	0.0517396	0.00880103	0.0926793	0.0581663	0.0297622	-0.0490172	-0.067199	0.0660144	-0.209927	0.0874182	0.126221	0.1621	-0.00331627		CGG	-0.0212839	-0.0912422	-0.0162853	0.111245	-0.0429967	-0.0115131	0.102772	-0.162916	-0.0461858	0.0653123	0.00305884	0.186005	0.0088828	0.246477	0.0343912	-0.0920667	0.206372		CGG	0.0756202	0.0782848	0.172092	0.0811929	0.0665726	0.0718766	0.0394853	-0.0644463	-0.0698533	-0.0297853	0.163468
CGT	0.00747144	0.0738003	0.0320324	0.0193559	-0.0111001	-0.00545916	-0.00714849	-0.131389	0.331966	-0.321871	0.0650707	-0.104992	-0.0344388	-0.0838487	0.0774309	0.0128593	-0.015992		CGT	-0.010667	-0.0306926	0.0735867	-0.0182915	0.0335452	-0.0499516	0.00802308	-0.0486393	0.00911504	0.564794	0.114392	0.0838974	0.0267057	0.0188666	0.0434381	0.0476744	-0.0328799		CGT	0.0256799	-0.00074827	0.00665047	-0.0151084	-0.0202398	-0.0162674	-0.0266668	-0.0401798	0.11982	-0.43081	0.0684755
CTA	0.045177	0.0675688	0.0377132	0.0032196	-0.0462594	0.00974618	-0.00884625	0.0396888	0.0442531	-0.0269637	-0.0247539	0.11348	0.0179671	-0.079645	-0.0410281	-0.104429	-0.0376588		CTA	0.0127504	0.0335897	0.0280676	-0.00453916	-0.113244	0.0800107	0.0861204	0.148762	-0.0208445	-0.00100368	-0.048593	0.148953	0.0222434	-0.0936935	0.0898305	0.0145417	0.0829966		CTA	-0.00483162	-0.0112953	0.0118261	0.0479126	0.0714364	-0.0879888	0.0963346	0.0660321	-0.117452	-0.116163	-0.0649883
CTC	-0.0433781	0.0271024	-0.00814276	0.0216275	-0.0389173	-0.0454742	-0.0359207	0.0101815	0.144162	-0.065185	0.135351	0.00873393	-0.186777	-0.406206	0.0200593	-0.0494609	-0.151361		CTC	-0.0430797	-0.0146503	-0.070392	0.028085	-0.0947072	-0.0326001	-0.0364086	-0.107042	-0.35481	-0.0868282	0.181236	0.0714334	-0.129983	-0.301683	0.0321702	-0.0656451	-0.0712556		CTC	0.00141565	-0.0138462	0.0310924	0.00731225	-0.0421651	0.011107	-0.01436	-0.0228854	0.0358029	-0.187409	-0.210075
CTG	-0.0214628	-0.00669968	0.00826971	-0.0212909	-0.0137433	-0.0398468	0.0549262	0.00384282	0.222032	-0.0606396	-0.0171207	0.0557464	-0.170907	-0.0604799	0.0194332	0.0272487	0.014164		CTG	0.0450082	-0.0194522	0.0174894	0.00458499	-0.00908755	0.0495362	0.109663	0.0461024	-0.200685	-0.0143077	-0.0293732	0.0337626	-0.0585022	0.021162	-0.0197528	-0.102516	-0.0782786		CTG	-0.0665228	0.028779	0.0523976	-0.0275915	-0.118281	-5.23902e-05	-0.0941753	-0.0477923	-0.138967	-0.267037	0.0139052
CTT	0.0317405	-0.0264767	-0.0343538	-0.0372548	0.00103414	-0.0147094	-0.0267791	-0.0636977	0.309241	0.0373801	0.12214	-0.0237833	-0.0941294	-0.255822	0.101705	-0.0491129	0.000465704		CTT	-0.0182593	-0.0218453	0.0677358	0.000787899	-0.0639715	-0.0211585	-0.0472644	-0.0269544	-0.0476518	0.039156	0.182461	0.0373012	-0.111245	-0.105047	0.101652	-0.0511121	0.00146183		CTT	-0.0286754	0.0385687	-0.00518761	0.0774772	0.0249233	-0.047046	-0.0345012	0.0330756	0.0154722	-0.35973	0.000967288
GAA	-0.0249285	0.0109803	-0.0127026	0.00184059	0.00023895	-0.0103426	-0.0228213	0.048697	-0.267621	0.263295	-0.14458	-0.00809346	0.05458	0.161459	-0.0643793	0.0421845	0.125729		GAA	0.0133638	0.0277109	0.0114491	-0.0628579	0.0450895	0.032121	-0.101579	-0.0517811	0.0173821	0.0237861	-0.117582	-0.0850135	-0.0195681	0.113382	-0.0373072	0.02691	0.0334486		GAA	-0.0228786	-0.0445937	-0.0288218	-0.0325671	-0.023367	0.00396118	-0.0164846	0.0306843	-0.048816	0.112643	-0.0729111
GAC	-0.00560744	-0.0519166	0.0172306	-0.0479677	-0.0234533	0.00496271	-0.00210274	0.0258766	-0.29267	0.155898	0.00797704	0.0317942	0.109649	0.231002	-0.0731746	0.00784007	0.201123		GAC	-0.0715192	0.0014522	-0.0170101	-0.0182081	-0.00981197	-0.00585614	-0.0320015	-0.0261939	-0.338034	-0.247182	-0.0612604	-0.02528	0.0610042	0.0284584	-0.0704937	-0.00204821	-0.0496289		GAC	-0.0163925	-0.0635824	-0.0143002	-0.0169222	-0.0143271	0.0165408	-0.00642289	-0.0356127	0.118356	0.077852	-0.177951
GAG	-0.0052238	-0.0358873	-0.0749372	-0.0447339	-0.0250753	0.00548702	-0.0463628	-0.0924538	-0.284512	0.159474	-0.0742257	0.00878093	0.300937	0.394311	0.0053632	0.161439	0.0715997		GAG	-0.0147524	0.0368956	-0.0252043	-0.0704828	-0.0014345	-0.0225686	-0.053166	0.0582094	-0.00502877	-0.171303	-0.151479	-0.0808828	0.161949	0.180826	-0.0157639	0.0798424	0.0425484		GAG	0.00748902	-0.0413154	-0.0276975	-0.0177819	-0.0406835	-0.0388151	-0.023852	-0.0572699	-0.225172	0.110772	-0.0277103
GAT	-0.0269614	-0.0209504	-0.00856149	-0.00516604	0.00760422	0.0318262	-0.0258887	-0.171279	-0.268886	0.200134	-0.00249152	-0.0233831	0.309437	0.234169	0.00412235	0.0779721	0.0501921		GAT	0.00900892	0.00245974	-0.0225559	-0.00549126	0.0420273	-0.0430252	0.00613229	0.0116666	-0.217185	-0.0772965	-0.0861733	-0.0199766	0.156803	0.163949	-0.033585	0.0458569	0.0435605		GAT	-0.00605943	0.0142367	-0.00216595	-0.00186436	0.00831904	-0.00851705	-0.0280224	0.0200224	0.0639895	0.0400467	-0.108598
GCA	-0.0244644	-0.0502179	-0.00210287	0.00543685	-0.0331415	-0.0310567	-0.0116295	0.136751	-0.49321	-0.0322189	-0.0729966	-0.0218929	0.0373738	-0.126018	-0.158087	-0.0248506	0.0850153		GCA	-0.0100036	-0.0143077	-0.0431744	-0.0013115	0.0222012	-0.00665042	-0.0198281	0.019728	0.401559	-0.0127207	-0.166859	-0.0773958	0.0685639	-0.00836501	-0.0310782	0.021027	0.0766957		GCA	-0.00680514	0.0340167	-0.0740804	0.000621919	-0.0137168	-0.0183668	-0.019445	0.0110696	-0.0956259	0.123072	-0.0732501
GCC	-0.0164672	-0.0174918	-0.0508929	-0.0557083	-0.0484353	-0.0960626	-0.0562659	-0.0288909	-0.629948	-0.18871	0.0508905	-0.0702028	-0.111982	-0.0408123	-0.152902	-0.164363	-0.0258442		GCC	0.0466344	0.00661377	-0.00548528	0.00618793	0.0199809	-0.0228383	-0.0665842	-0.0421203	0.01486	-0.329583	-0.0880045	-0.0416885	-0.0739876	-0.0817235	-0.147807	-0.056679	-0.056145		GCC	-0.0695527	-0.0106709	-0.026742	-0.0512301	-0.0577582	-0.103455	-0.0190083	-0.0116359	0.0952962	0.114658	-0.19019
GCG	-0.00080264	-0.00983177	0.0546172	-0.0442249	-0.00637554	0.0440201	0.060908	-0.117357	-0.317857	0.0550622	-0.0438766	0.0983053	0.0211032	-0.0947677	-0.158209	0.07425	0.204916		GCG	0.106891	-0.186283	-0.0826163	-0.0430738	0.00417415	0.0776998	-0.0365933	-0.0213039	0.40367	-0.136771	0.00145059	0.0662225	0.0625882	-0.100771	-0.061766	0.0512761	0.049616		GCG	-0.0213002	-0.0364176	0.0351763	0.067547	-0.0671412	0.0196822	0.0213979	-0.00500441	-0.125029	0.176171	0.107147
GCT	-0.0697897	-0.0409122	-0.0146888	-0.0102988	-0.0162103	-0.016988	-0.0256999	-0.210719	-0.5501	-0.0780318	0.0317557	-0.0446803	-0.137393	-0.0581223	-0.177724	-0.106747	0.0661011		GCT	0.0240235	0.0215129	-0.0249202	-0.0141176	-0.0600869	-0.0254322	-0.0357185	0.0727808	0.277465	0.1878	-0.0800216	-0.0591987	-0.0617344	-0.0854165	-0.136232	-0.00373328	0.0475675		GCT	-0.0280095	-0.0561397	-0.0537027	-0.0665151	-0.0365607	-0.0280087	0.0170751	-0.0493023	0.0310521	0.000146798	-0.0952408
GGA	-0.0200944	-0.00588682	-0.0446288	-0.0557522	-0.0226589	-0.0501564	-0.0484282	0.103369	-0.460002	-0.0237082	-0.0326303	0.0449765	0.0849084	0.256758	0.0225138	-0.00864766	0.263194		GGA	-0.015204	-0.000897255	-0.00910203	-0.0243007	-0.0543094	-0.0328925	-0.0159831	-0.0344942	-0.179267	0.24392	-0.0433535	-0.0258813	0.194128	0.21989	-0.050167	0.0938277	0.102597		GGA	-0.0332542	0.0111827	0.0222032	-0.00340622	-0.0742782	0.00467744	-0.0632708	-0.0415013	-0.155629	0.0653799	-0.0837592
GGC	0.00549907	0.0214876	-0.0917151	-0.0248935	-0.0478973	-0.055127	-0.0358985	0.0840953	-0.304011	-0.116368	0.170594	0.196056	-0.137265	-0.197955	-0.0987807	-0.0172444	0.201227		GGC	-0.0478355	0.0318573	-0.00151735	-0.062096	0.0423346	-0.0526462	-0.0377903	0.0584533	-0.460767	0.0614809	0.0389233	0.0950955	0.0149285	-0.0882453	0.050849	0.0737046	0.0734521		GGC	0.0579997	0.000294706	0.00846592	-0.0300812	0.0182389	-0.0303978	-0.00826451	0.0462609	-0.0365977	-0.0156251	-0.070707
GGG	0.00416505	0.00258085	-0.0128179	0.00497336	-0.0282223	0.0236792	-0.0153361	-0.0656112	-0.413864	0.0249044	0.0394472	0.0249813	-0.0897641	0.183614	-0.00502078	0.0693246	0.00148663		GGG	0.0322688	-0.0674564	-0.101252	-0.186119	-0.0491404	-0.0296199	0.0108178	-0.0282921	-0.244348	-0.0458008	-0.0667607	0.0960561	0.0568934	0.0848987	-0.0250205	0.221625	0.0611058		GGG	0.184856	-0.0857481	0.054261	0.00501587	-0.020518	0.036002	-0.113007	0.14957	-0.140074	-0.0142323	0.0296082
GGT	-0.0528342	-0.00757396	-0.00156247	0.0435857	0.0251531	0.0743968	0.0669352	-0.0113714	-0.353252	0.00969208	0.189063	0.0593035	0.139873	-0.104273	0.04492	0.113998	0.0886844		GGT	-0.0525387	0.00250996	0.0208296	0.00119699	-0.0514372	0.064878	-0.0375555	-0.0291083	-0.00582692	0.217678	0.0958807	0.147509	0.197262	0.0111783	0.0375151	0.137174	0.118074		GGT	-0.076736	-0.0720593	-0.0529285	0.00331758	-0.00119999	0.0118218	-0.00912638	-0.0283484	0.159417	0.0598589	-0.0822321
GTA	-0.0139556	-0.0429083	-0.000600932	-0.0276865	0.0244228	0.00612213	0.0508768	0.0689547	-0.0330118	0.313952	0.0135267	-0.0331197	0.0411211	-0.0987767	-0.0858105	0.0715692	-0.00978595		GTA	0.0201524	-0.0600123	-0.0326181	-0.0101803	-0.0406976	0.00988791	0.0198709	0.0958415	0.0952353	0.0412503	-0.0474338	-0.0153083	0.0822519	0.0326851	0.111806	0.0735259	0.0311172		GTA	0.0282428	0.0580788	0.00226588	0.0188147	-0.00284833	0.0432156	0.0218292	-0.0404912	-0.20273	0.0489065	-0.092344
GTC	-0.027482	-0.0432573	-0.00294633	-0.0325763	-0.00204336	-0.00484798	-0.016745	0.0667667	-0.13389	0.290658	0.0976235	-0.111361	-0.131975	-0.0636528	-0.18004	-0.0480539	0.0229422		GTC	0.0310161	0.0134557	-0.0385907	0.00774963	0.0369745	-0.0537162	-0.00297098	-0.0665297	-0.336559	-0.146086	-0.0201802	-0.04678	-0.0684465	-0.114141	0.0147193	0.00870443	0.0408304		GTC	-0.0218023	0.0385437	-0.0503653	-0.0591287	0.0168618	0.0138174	-0.0291095	0.0344011	0.0364611	-0.00033395	-0.14584
GTG	0.0165736	-0.0176769	0.00711577	-0.0359091	0.0102864	0.0236491	0.0146152	-0.0339585	0.106894	0.359334	0.178448	0.00912637	0.130663	-0.0208894	-0.0190766	0.076762	0.183679		GTG	0.00537298	0.0430664	-0.00522411	-0.0289522	0.0694358	-0.0358149	-0.0118231	0.070285	-0.160393	0.0721129	-0.0157162	-0.0329589	0.141438	-0.0380175	0.005019	0.142153	0.0941354		GTG	-0.021419	0.0109416	0.0205689	-0.0658752	-0.0541965	0.0479681	-0.0133265	-0.0193519	-0.115991	0.0919897	0.127038
GTT	-0.00948553	-0.0257665	-0.0344881	-0.0223902	-0.0480523	-0.0315764	-0.0133319	-0.105783	0.15109	0.38197	0.175585	-0.0986142	0.0270406	0.027067	-0.105536	0.0507192	0.0800419		GTT	-0.0415611	0.00294692	0.00196599	0.0399305	-0.0254078	-0.0155152	-0.084322	-0.0102835	-0.111462	0.0331744	0.0838244	0.0631294	0.0436399	0.0345315	-0.0471943	0.0586905	0.0821426		GTT	-0.0439523	0.00131796	-0.0255738	0.00421021	-0.0287053	-0.0124271	0.0183535	0.00911592	0.021	-0.0664772	0.0204714
TAC	0.0458083	-0.0197479	0.0165562	0.0459653	0.0160468	0.0106861	-0.000103148	0.10638	0.152537	0.0950907	-0.131887	-0.0191859	-0.0744803	0.178145	0.0366699	-0.0754964	-0.141661		TAC	-0.0229324	-0.0148607	-0.00362212	-0.00382862	0.00193805	0.0138171	-0.0372727	0.0774819	-0.406951	-0.230358	0.0169117	-0.0631196	-0.0343157	0.0561448	0.0493647	-0.0591081	-0.083315		TAC	0.0449807	-0.0215385	0.0481193	0.00843914	0.0340631	0.000484358	0.0464176	-0.0165552	0.156405	0.198165	-0.0630556
TAT	-0.00211754	-0.0034676	0.00783338	-0.0520617	0.00412654	0.053636	0.0139107	-0.0990171	0.128283	0.142513	-0.124678	-0.0544192	0.268815	0.23103	0.146303	0.0298858	-0.0902232		TAT	-0.00709144	0.0248783	-0.0408804	0.0708751	0.0425723	0.0520221	-0.0315293	0.0604514	-0.11217	-0.0795106	0.046692	-0.0458679	0.188004	0.184085	0.062582	0.0230525	0.0381936		TAT	-0.00877693	0.00385678	-0.00987784	0.0313345	-0.0250026	0.00469827	-0.00878221	0.00786702	0.123484	-0.00271227	0.010005
TCA	-0.0412243	0.0324112	0.017654	0.00616	-0.0323332	-0.00429108	-0.0151457	0.0352049	-0.111003	-0.000376311	-0.0494214	0.0629802	0.0448651	-0.14943	0.0509606	0.0205198	-0.148559		TCA	-0.0236904	0.00988382	0.0456906	0.0401061	0.0598832	0.00948528	-0.0728888	0.0701741	0.367297	0.0420533	-0.169458	-0.0375187	0.0228497	-0.0746877	-0.0326236	0.0309045	-0.0216927		TCA	-0.0414141	-0.0178318	-0.0957275	-0.0190697	0.0145671	-0.0299248	-0.0340173	-0.0859579	-0.101533	-0.0299917	0.033516
TCC	-0.0452133	-0.0325469	-0.01005	0.0150296	0.0261918	-0.0268918	-0.0302908	0.0415912	-0.0333119	-0.214423	-0.0248086	-0.0818318	-0.197959	-0.231664	-0.0379199	-0.194461	-0.300867		TCC	-0.0378145	0.0392424	-0.0355146	-0.0412559	0.0190101	-0.02849	-0.0486938	-0.113815	0.0683106	-0.210111	-0.0266961	0.0211141	-0.184549	-0.162409	-0.053726	-0.192394	-0.220993		TCC	-0.0157414	-0.0547567	-0.00353946	0.00150544	-0.0125428	-0.0419534	-0.0606621	0.00967796	0.077269	0.0638845	-0.0826926
TCG	0.00658406	-0.0393898	-0.0328035	-0.0765362	-0.0704925	0.00605723	-0.0206827	-0.0126918	-0.103603	-0.0218654	-0.000241295	0.0952362	0.0168439	-0.103789	0.0796462	0.0256874	0.0413177		TCG	0.00790708	-0.0313657	-0.00566331	-0.00332525	0.0163639	0.0533453	0.00731102	0.0505343	0.28385	-0.149534	-0.038684	0.0153228	-0.08408	-0.0414541	-0.0375839	-0.0250067	0.0185388		TCG	0.00129035	0.0301667	-0.00158592	-0.0327672	0.00711862	-0.0398189	0.00768572	-0.0336184	-0.0464146	0.0940395	0.00417831
TCT	-0.0257501	-0.0158688	-0.0498276	-0.00594542	-0.0459373	0.0237042	-0.0163029	-0.178543	0.000566544	-0.059021	0.035933	-0.0110231	-0.110715	-0.183058	-0.0031781	-0.0489973	-0.101568		TCT	-0.0309655	-0.000643756	-0.0118637	0.0135964	-0.0287081	0.0133874	-0.0188229	0.0124264	0.325576	0.184621	0.025918	0.00580496	-0.0742626	-0.115226	0.00795316	-0.00753148	0.0357492		TCT	-0.0407718	0.0179311	-0.054832	0.0036113	-0.0901143	-0.0409263	-0.0351378	0.00874649	0.0856008	-0.237887	0.0724598
TGC	0.018345	-0.0619772	-0.0251905	-0.018513	-0.0727639	-0.109318	-0.00319754	0.0363504	-0.0597472	0.0622533	0.0324663	-0.134373	-0.0902836	0.088421	0.0912491	-0.056868	-0.0168749		TGC	-0.0064384	0.0296993	0.0180257	0.0222871	-0.0288674	-0.113839	-0.0364607	-0.0346954	-0.595292	-0.0112287	-0.0958997	-0.0211681	-0.017768	0.028661	-0.0255896	-0.116154	0.0117484		TGC	0.00432841	0.0630058	-0.0374784	-0.0278831	-0.0880963	-0.0568746	-0.0153218	0.130365	0.12887	-0.0273897	-0.0484419
TGG	0.0474086	-0.0498655	0.0374256	0.0781131	0.0909373	-0.00832529	-0.0211165	0.0653531	-0.0103146	0.0919968	-0.0654965	0.110761	-0.0989707	0.0629918	0.247513	0.148931	0.176093		TGG	-0.022164	0.0217572	-0.0181044	-0.00935649	0.0374502	0.00106985	-0.058994	-0.00385657	-0.10305	0.0459881	0.174848	0.0199461	0.00570417	0.151153	0.112508	0.125646	0.0721469		TGG	-0.0204625	0.0313944	0.0179847	-0.034632	0.0986829	0.064198	0.0647323	0.0334909	0.00551039	0.203203	0.229872
TGT	0.0215672	0.0147263	-0.0068263	0.0421845	-0.0313989	-0.0117371	0.0315511	-0.149033	0.00871079	0.114509	0.113763	-0.0355097	0.21621	0.166363	0.203474	0.0661272	0.0956825		TGT	-0.0537042	-0.114152	-0.00745246	0.0362657	0.00959492	-0.103858	0.0950515	-0.0386734	-0.0935664	0.206131	0.0788851	0.0442917	0.209487	0.0752098	0.146287	0.0834197	0.027272		TGT	0.0124824	0.0667643	0.00542124	-0.0493494	-0.0138675	-0.0129635	-0.0610032	0.000135301	0.108702	0.00536139	0.180479
TTA	8.91621e-06	0.0161308	0.113544	-0.0172835	0.0485071	-0.0120811	0.0192036	0.148304	-0.0860122	0.264376	0.0851633	0.229637	0.0164712	0.136885	0.158273	-0.0196604	0.0700511		TTA	-0.0198487	-0.0197642	-0.0432078	0.0792289	0.0301978	0.0205229	0.109257	0.17249	-0.0382631	0.1778	0.0380538	-0.0366715	-0.0176844	0.136186	0.038657	0.0143864	-0.0583024		TTA	-0.0141018	-0.00973296	-0.030286	0.00331337	0.0463734	0.0767152	0.0889199	-0.0516218	-0.0526402	0.0880297	-0.0277068
TTC	0.0133848	0.00362644	0.0260869	0.00145538	-0.029464	0.0270086	-0.0145504	0.0252436	-0.0632334	0.0578932	0.0014426	-0.106431	-0.0938629	0.0712894	0.0858906	-0.0729703	-0.127135		TTC	-0.00610527	0.0125873	-0.0346495	0.00747934	0.0184833	0.0235517	-0.00957093	-0.0614094	-0.375295	-0.0732747	0.0282103	-0.0338455	-0.0617286	0.0523056	0.0639633	-0.03697	-0.0326963		TTC	-0.0108959	-0.0172173	-0.00764983	-0.0381691	-0.0258604	-0.00615416	-0.0110468	0.0105538	-0.0292579	0.169411	-0.18528
TTG	-0.00924872	-0.0206133	-0.0193957	0.0372812	0.0177817	-0.0364956	-0.032816	-0.061026	-0.157992	0.191021	0.136266	0.165156	0.112593	0.0892085	0.222004	0.185109	0.117095		TTG	0.0328645	-0.0133052	-0.0187951	0.0361702	-0.0326553	0.00951884	0.0568431	-0.000326429	-0.309515	-0.0315355	0.0820943	0.0523628	-0.0184278	0.106125	0.166384	0.0734326	0.0773993		TTG	-0.0445231	-0.0430759	-0.0337531	0.0296138	0.03167	0.0177445	0.00953387	0.0281157	-0.0434597	0.136313	0.0615866
TTT	-0.0142469	0.0365028	-0.0181006	0.0443973	0.0500466	0.0517008	0.0371492	-0.0660594	-0.236978	0.186163	0.0907851	-0.0469771	0.15197	0.130216	0.164329	0.0697958	0.0163316		TTT	-0.0276639	-0.0344872	0.00375	0.0435742	0.000980968	0.0821334	0.00703809	0.0341861	-0.123435	0.0383452	0.194105	0.00580143	0.0797826	0.0837722	0.111665	0.099064	0.0678513		TTT	-0.0187822	-0.011724	0.0765224	-0.00263114	0.00106635	-0.00670056	0.0872039	0.0599036	0.135461	0.0339795	-0.0145432
[truncated: 60 more columns]

## Sheet: Supplemental_Figure_S26
POOLED D. RERIO DATA FIRST FRAME
CODON	POS-8	POS-7	POS-6	POS-5	POS-4	POS-3	POS-2	POS-1	POS0	POS1	POS2	POS3	POS4	POS5	POS6	POS7	POS8
AAA	0.0140357	-0.00948741	-0.0293987	-0.031485	-0.0157865	-0.0180877	-0.0321566	-0.0113737	0.0174162	-0.194357	-0.192511	0.272461	-0.0764033	0.155378	-0.0913927	-0.0958828	0.384017
AAC	0.00189707	-0.00500545	-0.0184967	0.0128929	-0.00140153	0.0175022	-0.00755677	0.0209187	0.228986	-0.0866775	-0.158913	-0.0959017	0.269217	0.0225332	-0.0380351	-0.107551	-0.171275
AAG	-0.0319798	-0.0346811	-0.0450565	-0.0347474	-0.0662243	-0.0358682	-0.0274827	0.121974	0.169073	-0.0516074	-0.173389	0.0803949	-0.138765	0.0516451	-0.116361	-0.0967202	0.284231
AAT	-0.0121739	0.00784556	0.0177418	-0.0193877	-0.00737514	-0.00249471	0.0458884	-0.0703976	-0.0174504	-0.0931916	-0.19237	-0.0123675	0.434278	-0.00582535	-0.111047	0.000110387	0.0426736
ACA	-0.000893321	-0.0174941	0.00166742	0.00607528	-0.0158287	0.000432844	-0.0335144	0.0175107	-0.254261	0.0504712	-0.0799095	-0.0197943	-0.0114549	0.0580182	-0.121882	-0.047574	-0.0276739
ACC	0.0241282	0.0196346	0.00583628	-0.0147192	0.00398616	0.0271548	-0.0283204	0.0689068	-0.0289546	0.214221	0.133827	-0.0376654	-0.119123	-0.251926	0.0127713	0.0252334	-0.349462
ACG	-0.0353261	0.0118808	-0.032424	-0.037488	0.0317362	0.0631725	0.0195172	0.102687	0.082897	0.224949	0.112721	0.0230195	0.0745677	0.311264	0.0593555	0.00617168	0.217493
ACT	-0.0396466	-0.0220089	0.0455752	0.0198684	0.0113434	0.00586465	-0.0543178	-0.0613456	0.0685084	0.281734	0.0642269	0.238282	0.0580353	-0.0781137	0.0710173	0.105516	-0.0419337
AGA	-0.00698826	-0.0107405	-0.0125463	-0.0291883	-0.0705064	-0.00209952	0.027491	0.0711451	0.202473	-0.0819328	-0.199686	0.120024	-0.0490576	0.0323091	-0.0873914	-0.084903	0.112011
AGC	-0.0168607	-0.062278	-0.0201779	0.0248569	-0.0225681	0.00424677	-0.0379045	-0.0732919	0.273672	-0.108589	-0.0551767	-0.279416	-0.227713	-0.202204	-0.04663	-0.0339725	-0.216204
AGG	-0.00387712	0.0263683	-0.0170939	0.000414869	-0.0365239	-0.0048602	0.03508	0.174718	0.372769	-0.0726038	-0.0973177	0.133963	0.0644385	0.208704	-0.033036	-0.128923	0.223694
AGT	-0.00221683	0.0149492	0.0331918	0.000756596	0.00405297	0.0160026	-0.0218217	-0.139312	-0.0895507	-0.137473	-0.0475519	-0.143504	0.0988892	-0.157144	-0.0483617	-0.0222214	-0.0135337
ATA	0.0608744	0.0133982	0.0728279	0.0627799	0.0334771	0.0400481	0.0506008	-0.00325174	-0.171322	-0.0878356	-0.119165	0.0326805	0.127251	0.277268	-0.224222	0.0222664	-0.0947362
ATC	0.00205942	0.0129442	0.0169585	1.99e-05	0.0059903	0.0265847	0.0197159	-0.0734737	0.138903	0.121439	0.0638919	0.0114587	-0.168288	-0.137159	-0.0604134	0.0250257	-0.390627
ATG	-0.00174883	0.0161864	-0.0138571	0.00473587	-0.0271252	-0.0257945	0.0107151	0.100969	0.0679818	0.0503829	-0.106181	0.00495274	-0.11728	-0.0475481	-0.145767	-0.00636572	0.125605
ATT	0.0820676	-0.0124003	0.0202672	0.0272248	0.0731398	0.0470561	0.0351386	-0.179112	-0.191521	-0.0675849	-0.159036	0.058482	-0.110289	-0.177507	-0.186286	0.00427809	-0.252528
CAA	0.0300738	-0.0203097	-0.0145465	0.0153805	0.0446356	-0.0444546	-0.0391706	0.00538432	-0.104575	-0.19531	-0.0353187	-0.0467445	0.092467	-0.425307	-0.0965754	-0.0849511	0.27222
CAC	0.0138231	-0.0112281	0.00862817	0.020756	0.0552505	-0.0214397	0.0370415	0.0388993	0.0927495	-0.0963276	-0.0438122	-0.0343618	0.0142721	-0.222728	-0.0398796	-0.084947	-0.201421
CAG	0.0297082	0.0121131	0.00736216	0.00512185	0.0120102	-0.0144187	0.017244	0.0829593	-0.0998305	-0.0457281	0.0106435	-0.0704387	0.100302	-0.446502	-0.025375	-0.0254682	0.119633
CAT	0.0844487	0.0142481	0.0160181	-0.039757	-0.0142125	-0.0207276	-0.0491761	-0.0496486	-0.0240403	0.0145252	-0.0818742	0.0404938	0.192684	-0.0963289	-0.0957242	-0.0493343	0.0224167
CCA	-0.064646	-0.0452483	-0.0393161	-0.0232723	0.0190253	-0.0420434	-0.0295585	6.11e-05	-0.347075	0.123882	0.111065	0.221958	0.201346	0.252939	-0.032823	0.0381739	-0.126833
CCC	-0.0512744	-0.00562427	-0.0301826	-0.0538276	-0.022311	-0.0374112	-0.0348038	0.0295774	-0.233913	-0.0405255	0.0387592	0.00896575	0.0721125	0.00807159	-0.139198	-0.126122	-0.607217
CCG	0.00144606	-0.0166231	-0.00774641	0.0221739	0.0179072	-0.0217794	-0.0189833	0.0948207	-0.187003	0.186473	0.162773	0.180272	0.148078	0.448117	0.0960116	0.1464	0.101802
CCT	-0.00120754	-0.0163238	-0.0144253	-0.0150768	-0.0241876	-0.00433397	-0.013124	-0.0912324	-0.010767	0.169963	0.075401	0.348084	0.282834	0.259302	0.0462208	0.137045	-0.23793
CGA	-0.019827	0.0250518	-0.0117021	-0.0146586	-0.0671343	-0.0819164	-0.0456311	0.0597205	0.261134	-0.0837188	0.0227117	0.122798	0.251992	0.529943	0.0595796	0.0208915	0.24378
CGC	-0.00289048	0.0238446	-0.0284345	0.0112106	0.0224405	-0.00314333	0.040459	-0.0270767	0.215684	-0.23909	0.0379829	-0.194807	-0.236864	0.000654889	0.057678	-0.0193608	-0.123763
CGG	0.0235057	-0.035412	0.0284752	0.0526061	-0.00438205	-0.0269856	-0.012271	0.129419	0.17769	-0.0122712	0.0811412	0.046559	0.0256795	0.451691	0.155255	0.0507929	0.285137
CGT	-0.0336957	-0.022432	0.00333561	0.0198485	-0.0225197	0.044937	0.0152706	-0.0734381	0.0382955	-0.173915	0.0427897	-0.0482493	-0.0129671	-0.112279	0.0460757	-0.010483	0.0326096
CTA	-0.0198071	-0.0135927	0.0119832	0.0108378	0.0274055	0.0235449	0.00862663	0.00509039	0.0345181	0.111577	0.0985709	0.178728	-0.0810662	0.0553571	-0.00508628	0.106704	-0.112335
CTC	0.0491866	0.0229379	0.0269783	0.0210605	0.0296572	0.0658363	0.0294753	-0.0481334	0.279542	0.0243574	0.0695799	0.0297211	-0.258888	-0.211352	-6.04e-05	0.0224852	-0.357042
CTG	0.00830893	0.00878257	0.0288359	0.0103378	0.0218177	0.0225707	0.0389748	0.128342	0.174774	0.282077	0.215767	0.147798	-0.121277	0.0252525	0.178672	0.216442	0.12997
CTT	0.0559563	0.0302109	0.0305998	0.0135316	-3.19e-05	0.00424488	0.0251165	-0.169013	0.154394	0.153625	0.079131	0.222244	-0.0636639	-0.0845625	0.0372892	0.0979962	-0.0941913
GAA	-0.0633325	-0.0733623	-0.0759156	-0.0855853	-0.0374927	-0.0654614	-0.125699	-0.0690579	-0.111477	-0.213365	-0.105229	-0.0611394	-0.196925	0.216296	-0.106373	-0.129863	0.247574
GAC	-0.0219552	-0.0136689	-0.00423496	-0.0198258	-0.0199525	-0.0251831	-0.0417822	-0.0312409	0.108728	-0.0246168	0.095615	-0.117538	0.00450186	0.328486	0.0300933	-0.044517	0.035647
GAG	-0.028453	-0.0230207	-0.032453	-0.0419159	-0.0428276	-0.0539634	-0.0435908	0.0328596	0.0373511	-0.110571	-0.0589976	-0.163824	-0.241703	-0.0632034	-0.0885974	-0.131791	0.219712
GAT	-0.0606707	-0.0480341	-0.00427966	-0.0360509	-0.0462687	-0.0465282	-0.0468834	-0.169846	0.0175314	-0.0210058	-0.0196329	-0.0755768	0.270303	0.212255	-0.0869244	-0.0105664	0.105346
GCA	-0.0296169	0.0018859	-0.0244675	0.000544549	-0.00194184	-0.00874454	-0.0235344	-0.00528249	-0.277689	-0.0194456	-0.0205612	-0.163553	-0.213149	-0.0431548	0.0608492	-0.029207	-0.124741
GCC	-0.0144167	-0.0270169	-0.028514	-0.0154436	0.0342781	0.000556763	0.0177339	-0.00100349	-0.150821	0.0378069	0.127573	-0.145273	-0.420864	0.0343685	0.0658634	0.0207867	-0.386714
GCG	0.0792668	0.0339383	0.0141101	0.0155355	-0.0115199	-0.0160403	0.0378467	0.092415	-0.0727914	0.116374	0.165661	-0.0611562	-0.20104	0.178657	0.12719	-0.0216564	0.204052
GCT	-0.013055	0.00748902	-0.00510399	-0.026399	-0.0208894	-0.0332658	-0.0596446	-0.0968535	0.0342583	0.184585	0.148352	0.0489452	-0.119539	0.120083	0.204522	0.14713	-0.0349165
GGA	-0.038532	-0.0477402	-0.0145667	-0.0650552	-0.044201	-0.0447318	-0.0436067	-0.0349948	0.0944383	-0.218063	-0.0796282	-0.166567	0.167045	0.19689	0.0621116	-0.0679605	0.271744
GGC	-0.0181889	-0.028041	-0.0138567	-0.0409205	-0.0736423	-0.055663	-0.0385676	-0.101641	0.232308	-0.19273	0.0457736	-0.244042	-0.0352524	-0.044926	0.0697445	0.00241474	-0.0415291
GGG	0.0155954	-0.0149876	-0.0414562	-0.00312926	-0.0285478	0.00944341	0.0449828	0.0856402	0.233906	-0.10396	0.0186447	-0.123065	0.0627502	0.330912	0.158407	0.0368301	0.320867
GGT	-0.044356	-0.0619932	-0.03832	-0.0355418	-0.0374145	-0.0600575	-0.0274265	-0.153332	0.0140836	-0.247906	-0.00275719	-0.177335	0.238531	-0.219058	-0.0199466	-0.0365366	0.133765
GTA	0.0641367	0.0198088	0.0147651	0.0217098	-0.00921302	-0.0247267	0.0170278	0.0178295	-0.000763444	-0.119774	0.0150819	0.0279325	-0.0224146	-0.224217	0.0124734	-0.00592849	-0.105668
GTC	0.000940709	0.0350622	0.0240319	0.00411475	0.0202785	-0.00230341	0.025159	-0.00963485	0.161667	-0.0641847	0.139773	-0.148174	-0.19068	-0.295438	0.111782	0.0501241	-0.156935
GTG	0.0324241	0.0286649	-0.00100642	0.0411489	0.0173618	0.0173745	0.000252104	0.116308	0.120624	-0.0218485	-0.00423041	-0.0689856	-0.196648	-0.27503	0.0194399	-0.0366927	0.184759
GTT	0.0050056	-0.00628488	0.0431188	0.0123549	0.0163576	0.000853953	0.0539288	-0.137318	0.090298	0.0121033	0.0580402	-0.010933	-0.0272918	-0.238807	0.0818024	0.0892171	-0.0119906
TAC	-0.0504338	0.0190241	0.0106257	0.0048209	0.0296532	0.076456	0.0297841	0.0672777	0.0162547	-0.0281641	-0.192415	-0.143432	-0.0940796	-0.156665	-0.00271664	-0.0966341	0.0116268
TAT	-0.0184319	0.0587161	0.022241	0.0429152	0.0491936	0.0665447	0.0373971	-0.037844	-0.0945431	-0.0189657	-0.163208	0.105314	0.280538	-0.119561	-0.123977	0.0179394	0.0773918
TCA	0.0207093	0.0230926	0.0322112	-0.00140048	0.00715107	0.0504546	0.012154	0.0569289	-0.38966	0.147881	0.0562194	0.0213604	0.0817774	-0.246421	-0.029558	0.0438264	0.0808658
TCC	-0.0291725	-0.0137731	0.00582561	-0.0116773	-0.0141812	-0.00933241	0.0672885	0.0789959	-0.0910453	0.100906	0.0824917	-0.155144	-0.261063	-0.392441	9.3e-07	-0.0561637	-0.370481
TCG	-0.0694663	0.0149344	0.00265493	-0.00395091	-0.0156105	0.015604	-0.0680515	0.0604005	-0.259222	0.194579	0.0185263	-0.0300587	-0.000587325	0.156092	0.110146	0.051916	0.174736
TCT	-0.00358593	-0.00288088	0.0303535	0.0142852	0.0167188	0.00496355	0.0353238	-0.0441988	-0.019791	0.308541	0.0713189	0.100186	0.0917701	-0.11078	0.158409	0.106366	-0.0898526
TGC	-0.0213674	0.0758814	0.0644802	0.0366897	0.0251306	0.0111772	0.0147259	0.00251367	0.238135	-0.0351276	0.0496668	-0.23672	-0.146422	-0.0430107	0.0314514	-0.0189172	-0.125568
TGG	-0.0064205	-0.0379574	-0.0679042	0.0411983	0.00479608	-0.0223972	0.0105797	0.144133	0.051699	0.109344	-0.00502942	0.00338972	-0.182162	0.575425	0.113032	0.00277233	0.273647
TGT	0.035407	0.0480495	-0.00432551	0.0116314	0.041853	-0.0224478	-0.00212954	-0.0810464	0.0151749	-0.0456699	0.0208406	-0.0958177	0.120944	-0.137707	0.00747041	0.0193839	0.10478
TTA	0.0518371	0.0471452	0.0458568	0.0164026	0.0141103	0.0543751	0.0824064	0.0238778	-0.313401	-0.0081696	0.059594	0.196398	0.333718	0.0197173	-0.0431555	0.0568538	-0.0344585
TTC	0.0301239	0.0383831	0.00172574	0.00211066	0.00987894	0.0552528	0.0220042	-0.0258919	-0.161525	0.0724145	-0.000191885	0.148602	0.0967202	-0.185705	0.0495336	-0.017746	-0.146052
TTG	-0.00124125	0.0416275	0.00501426	0.0611902	0.0485987	0.02928	0.017614	0.125555	-0.306317	0.0993937	-0.0452391	0.0406184	-0.138282	0.0336716	-0.0171204	-0.0374367	0.108867
TTT	0.06079	0.00555198	-0.00148816	0.0113607	0.0725859	0.0971697	0.0241452	-0.0885526	-0.50861	-0.0312953	-0.154823	0.155498	0.224162	-0.0986886	-0.0303343	0.0953039	-0.105058

## Sheet: Supplemental_Figure_S32
ARTIERI S. CEREVISIAE ONLY DATA FIRST FRAME																			ARTIERI S. CEREVISIAE ONLY DATA SECOND FRAME																			ARTIERI S. CEREVISIAE ONLY DATA THIRD FRAME
CODON	POS-8	POS-7	POS-6	POS-5	POS-4	POS-3	POS-2	POS-1	POS0	POS1	POS2	POS3	POS4	POS5	POS6	POS7	POS8		CODON	POS-8	POS-7	POS-6	POS-5	POS-4	POS-3	POS-2	POS-1	POS0	POS1	POS2	POS3	POS4	POS5	POS6	POS7	POS8		CODON	POS-8	POS-7	POS-6	POS-5	POS-4	POS-3	POS-2	POS-1	POS0	POS1	POS2
AAA	-0.00348623	-0.00489968	-0.00749041	-0.0136849	-0.0256253	0.0246946	-0.0228385	0.0163624	-0.570639	-0.11369	-0.242137	-0.0794826	-0.00629773	0.107944	-0.212958	-0.153209	-0.890272		AAA	-0.0166252	-0.0344196	-0.0249194	0.0249054	-0.00355915	0.00491899	0.0159944	-0.0478337	-0.277026	-0.0670543	-0.0369932	0.000609517	0.113707	0.159499	0.0297126	0.0510725	-0.178286		AAA	0.0245643	-0.0160649	0.00860145	0.000725008	0.00927136	0.0213365	0.0124108	0.0193313	-0.434635	0.203545	0.113184
AAC	-0.0663084	-0.0526496	-0.0409228	-0.0680024	-0.0231163	-0.0511519	-0.0748483	-0.0261555	-0.222933	-0.104443	-0.116142	-0.16955	0.274109	-0.098835	-0.235272	-0.226605	-0.0796157		AAC	-0.0788366	-0.0358738	-0.0737511	-0.066559	-0.107555	-0.0578418	-0.0517465	-0.0722388	-0.71145	-0.13073	-0.143559	-0.115198	0.054333	-0.108147	-0.195464	-0.195966	-0.174996		AAC	-0.0731737	-0.0717284	-0.0740373	-0.072388	-0.0900507	-0.0778526	-0.0946782	-0.0709896	-0.243217	-0.265319	-0.207776
AAG	-0.117903	-0.11305	-0.113885	-0.079769	-0.0790171	-0.0965678	-0.136471	-0.161581	-0.234163	-0.256358	-0.315765	0.0395061	0.122847	0.0840089	-0.20472	-0.205103	0.201393		AAG	-0.153744	-0.113511	-0.151587	-0.119033	-0.127433	-0.120556	-0.150889	-0.0648863	-0.399259	-0.285309	-0.13828	-0.105689	0.0921742	0.0636016	-0.0819439	-0.11831	0.0901938		AAG	-0.171114	-0.145072	-0.149254	-0.145352	-0.12373	-0.128251	-0.159093	-0.181934	0.308	-0.37622	0.261581
AAT	0.0220041	0.0370304	0.0149101	0.0300843	0.0361642	0.0162288	0.0190039	-0.121155	-0.387553	-0.136697	-0.110104	-0.174344	0.278408	-0.0634196	-0.151879	-0.0604092	0.106439		AAT	0.0404272	0.0769114	0.0332304	0.0365398	0.0520656	-0.00496491	0.0450249	0.0492775	-0.524802	-0.0560052	0.0442347	-0.00323483	0.234148	0.00899609	-0.00844651	0.0198991	0.203044		AAT	0.0769023	0.0450072	0.0434777	0.0766657	0.0562306	0.0686567	0.0828341	0.0831162	0.139359	-0.0301864	0.0313236
ACA	0.0235124	0.0358653	0.0439088	0.0246297	0.00653672	0.041139	0.00622074	0.0981825	-0.528754	0.00497719	-0.0514269	0.108879	-0.0628418	-0.201432	-0.113177	-0.0900453	-0.35218		ACA	0.117017	0.0227556	0.0980612	0.0438117	0.0399837	0.0535835	0.0375126	-0.0297195	0.389581	-0.16824	-0.0668905	0.00196525	-0.0118565	-0.0775725	-0.0602261	-0.0533139	-0.22597		ACA	0.0637888	0.0244114	0.0702875	0.0521468	0.0591398	0.0484512	0.0678369	0.0558976	-0.405739	0.382993	0.00302839
ACC	-0.0744294	-0.0824606	-0.0882089	-0.0652224	-0.0350961	-0.0722055	-0.048186	-0.0109979	-0.20758	0.163686	0.0697896	0.0646166	0.184601	-0.157905	0.0221856	-0.0883996	-0.208705		ACC	-0.0698026	-0.123603	-0.102536	-0.0463392	-0.061623	-0.040036	-0.0292094	-0.068001	0.201812	-0.0432949	-0.102371	-0.086706	0.00896016	-0.158955	-0.103833	-0.144305	-0.450171		ACC	-0.115155	-0.139703	-0.136608	-0.141717	-0.0833866	-0.144081	-0.0841664	-0.0698732	-0.18936	0.128487	0.0431739
ACG	0.0821698	0.0644626	0.0252934	0.0567269	0.0795753	0.0438682	0.0583173	0.0862272	-0.189495	0.154235	-0.0155262	0.226335	0.443139	-0.0600396	0.0819442	0.0421675	0.280731		ACG	0.0565669	0.125955	0.12696	0.0946667	0.129582	0.0479038	0.113397	0.108617	0.549393	-0.0281668	0.0666633	-0.0131638	0.186074	0.0228497	0.0733536	0.0153396	0.109886		ACG	0.12992	0.0929466	0.111465	0.149162	0.173023	0.112233	0.104915	0.0772341	0.464414	0.231091	0.267304
ACT	-0.0810603	-0.0540002	-0.046124	-0.0655217	-0.0688294	-0.0503922	-0.0167877	-0.149193	-0.399637	0.0614013	-0.00295767	0.0142622	0.175454	-0.376414	0.000614997	0.00150737	-0.034376		ACT	-0.0816545	-0.0763722	-0.0571967	-0.0572114	-0.0460017	-0.113442	-0.0570214	-0.0752475	0.308739	-0.272287	-0.0682907	-0.0890432	0.0330947	-0.302927	-0.0676115	-0.0319849	-0.0169907		ACT	-0.0925283	-0.0757734	-0.0803033	-0.0580285	-0.0710229	-0.0852531	-0.0338173	-0.0453702	0.131295	0.283381	0.00279599
AGA	-0.0287818	-0.0837052	-0.0219024	-0.0761132	-0.0750495	-0.0511823	-0.0814549	-0.0247004	-0.156335	-0.0616653	-0.102596	-0.139281	-0.186305	0.129757	-0.156184	-0.107184	-0.241645		AGA	-0.0657629	-0.0734044	-0.086526	-0.0758574	-0.108177	-0.092691	-0.151282	-0.157592	0.113106	0.123808	-0.012354	-0.132004	-0.0667068	0.149669	-0.0692806	-0.0715255	-0.0766582		AGA	-0.0884737	-0.0834909	-0.106736	-0.0834804	-0.10139	-0.133341	-0.141878	-0.127006	-0.598889	-0.102341	0.0380904
AGC	0.031038	0.0189685	0.0435113	0.0379068	0.0232864	0.0432527	0.039352	0.0909662	0.0930975	0.0583996	0.0859966	0.0493935	-0.398286	0.175273	-0.00144751	-0.045377	0.00276037		AGC	0.0356812	-0.00422963	-0.00778885	0.00185736	0.0119552	0.036518	0.0269728	-0.0147847	-0.180768	0.169184	0.0324448	0.0817997	-0.258857	0.0451326	0.0494649	-0.089749	-0.141629		AGC	0.0622686	0.0269237	0.0288599	0.0572231	0.111359	0.0497922	0.0652202	0.0648304	0.0565722	-0.150641	-0.0239428
AGG	0.0948204	0.115915	0.119387	0.0825745	0.0668931	0.0777253	0.0478793	0.0648078	0.0772049	0.0174871	0.0809621	0.0959928	-0.372369	0.278984	0.12256	-0.057272	0.259036		AGG	0.16924	0.135683	0.0827993	0.0852636	0.0749465	0.123207	0.0407483	0.100114	0.500357	0.225567	0.222898	0.0824964	-0.0660731	0.210728	0.188118	0.0118057	0.164899		AGG	0.148075	0.102341	0.157122	0.107404	0.0948185	0.074536	0.115236	0.0210661	0.56723	0.0618074	0.37627
AGT	0.0301638	0.0157408	0.0397262	0.0350498	0.0281841	0.0265298	0.0242084	-0.033789	-0.146591	-0.123702	-0.029399	-0.0665335	-0.332591	0.0878823	-0.0519256	-0.0720599	0.11565		AGT	0.0509332	0.0212668	0.048774	0.0334353	0.0385554	0.00143594	0.0484355	0.0327423	0.117968	0.0922915	0.0603116	0.0558712	-0.106298	0.0417251	-0.0219623	0.117156	0.139607		AGT	0.0446858	0.0303394	0.0470428	0.0300751	0.0574466	-0.000729149	0.0462269	0.00750878	0.280737	-0.0794273	0.0333987
ATA	0.0993785	0.108769	0.106864	0.0688865	0.103252	0.0913835	0.0807463	0.135317	-0.504652	-0.0841754	0.0234072	-0.0104748	-0.550811	0.023586	-0.0150425	-0.00554034	-0.209411		ATA	0.0818119	0.0881228	0.00780936	0.062646	0.0724333	0.0729661	0.106497	0.103707	-0.0908556	-0.0415696	0.0856623	0.019194	-0.208374	0.085046	0.0426248	0.0404717	0.0716812		ATA	0.152188	0.116057	0.178399	0.149761	0.157759	0.101766	0.145538	0.156966	-0.387099	0.337382	0.0547331
ATC	-0.0818671	-0.0836039	-0.0769766	-0.0763405	-0.076294	-0.0708054	-0.0347842	-0.0193297	-0.523887	-0.0521626	0.116017	-0.0582896	-0.250425	0.128434	-0.0279751	-0.175981	-0.0964697		ATC	-0.0593574	-0.0876665	-0.112896	-0.112586	-0.073867	-0.0938863	-0.0505341	-0.0569869	-0.387137	-0.149968	-0.0767446	-0.0997002	-0.205453	-0.0400307	-0.0673586	-0.142184	-0.250933		ATC	-0.149332	-0.161857	-0.154132	-0.0994902	-0.125377	-0.094557	-0.0810668	-0.104913	-0.40191	0.0626021	-0.274286
ATG	-0.0199022	-0.0053284	-0.0268856	-0.0361646	-0.0291669	-0.0509177	-0.00445708	-0.0382255	-0.377147	-0.153208	-0.121804	0.0947627	-0.312906	-0.0584691	-0.0636955	-0.175065	0.168146		ATG	-0.0518591	-0.0309387	-0.0383634	-0.0398498	-0.0420289	-0.0289771	0.00252132	0.00210787	0.0493993	-0.264295	-0.0624507	0.0323644	-0.164905	-0.0785961	0.0165611	-0.116529	0.103791		ATG	-0.0583273	-0.0475158	-0.0542019	-0.0170319	-0.0398261	-0.00603836	-0.0586912	-0.0111325	0.334968	-0.113432	0.171941
ATT	-0.0539983	-0.0509092	-0.0468381	-0.0219496	-0.0338601	-0.0200844	-0.00129403	-0.069969	-0.686255	-0.215802	-0.0398379	-0.243876	-0.286881	0.0714941	-0.0510588	-0.0526742	0.0912561		ATT	-0.0333088	-0.0574691	-0.0571457	-0.00700658	0.0106963	-0.0103033	0.00221861	0.00684835	-0.158018	-0.265335	-0.0221599	-0.0336632	-0.222895	-0.00941009	0.0131546	-0.0677476	0.173817		ATT	-0.0514477	-0.0418456	-0.0625463	-0.0641171	-0.035803	-0.0292807	-0.0334558	-0.0646041	-0.00534016	0.0988489	-0.0835976
CAA	-0.0325093	-0.013263	-0.0389799	-0.0428397	-0.0319622	-0.0188856	-0.0368577	-0.0021887	0.051508	-0.278961	-0.217259	-0.1109	-0.159388	-0.490891	-0.0943361	-0.138017	-0.712588		CAA	-0.0124234	-0.0459824	-0.0418973	-0.0480721	-0.04757	-0.0675864	-0.0144558	-0.0732815	0.106933	-0.078749	-0.0635485	-0.111219	-0.169311	-0.312449	-0.0965448	-0.142783	-0.302514		CAA	-0.0403841	-0.0822672	-0.0611313	-0.0220765	-0.0732338	-0.0525431	-0.0910356	-0.059352	-0.456093	-0.781936	0.247408
CAC	-0.037183	-0.0202835	-0.0312754	-0.0574988	-0.067007	-0.0803341	0.000296117	0.000922012	0.325641	-0.10463	-0.0246358	0.15882	0.0314732	-0.941502	0.044868	0.0136953	-0.0900805		CAC	-0.05807	-0.100909	-0.076217	-0.0582206	-0.0547589	-0.0865996	0.010254	-0.043119	-0.0511972	-0.0943963	-0.04435	0.0368545	-0.138534	-0.606002	-0.149449	-0.110122	-0.299235		CAC	-0.0955256	-0.0772601	-0.0747279	-0.115562	-0.100371	-0.0824288	-0.0644733	0.00793321	-0.232559	-0.739437	0.210684
CAG	0.0582662	0.0630904	0.107474	0.0842574	0.0703542	0.0599637	0.0580487	0.0474861	0.289083	-0.125073	-0.10185	0.126234	0.323305	-0.0627112	0.0708438	0.0279632	0.363728		CAG	0.0532416	0.0751115	0.151678	0.0971364	0.0926775	0.030367	0.0791327	0.121629	0.22071	0.0123755	0.13496	0.159564	0.160132	0.0883589	0.0717241	0.0565934	0.203297		CAG	0.141228	0.0965649	0.0888038	0.0929731	0.104425	0.0714421	0.0758109	0.0645224	0.440009	-0.561989	0.460558
CAT	0.0735964	0.0721647	0.0547694	0.0295964	0.0267104	0.0245811	0.0637907	-0.0873842	0.144769	-0.227468	-0.137737	-0.00903811	0.15104	-0.792827	0.0163189	0.0156513	0.0544539		CAT	0.0779465	0.0202823	0.0355418	0.0519011	0.113587	0.0426715	0.0239632	0.00265001	-0.0673153	-0.0722551	0.0105616	-0.0066662	0.0662643	-0.36279	-0.0418361	0.0130469	0.100203		CAT	0.0696668	0.0809437	0.060543	0.0920753	0.0585399	0.0641118	0.0788401	0.0866937	0.141222	-0.627927	0.286867
CCA	-0.0794758	-0.0925132	-0.127905	-0.115166	-0.0805202	-0.116045	-0.118208	-0.00516343	-0.00166047	-0.286655	-0.00704458	-0.0834198	0.476041	0.389132	0.0670095	-0.0329335	-0.490625		CCA	-0.158609	-0.0725574	-0.0952984	-0.116736	-0.091123	-0.0728246	-0.0933418	-0.110134	0.513106	-0.185147	-0.0224115	-0.0867007	0.180214	0.136793	-0.0132915	-0.112973	-0.410212		CCA	-0.147187	-0.120307	-0.0762063	-0.105641	-0.159216	-0.123122	-0.111879	-0.119707	-0.457228	-0.298471	0.572112
CCC	0.0655099	0.109136	0.08565	0.0845747	0.0311405	0.03534	0.0514546	0.118634	0.591632	0.258719	0.333499	0.19345	0.718689	0.132644	0.41742	0.337066	0.115936		CCC	0.104135	0.0670259	0.136188	0.0907738	0.0457213	0.112438	0.0114173	0.124515	0.500563	0.324656	0.251742	0.0997816	0.351856	0.127636	0.228026	0.188522	-0.0822161		CCC	0.114612	0.0975153	0.10162	0.134654	0.05154	0.0995527	0.152639	0.159865	0.164958	0.009129	0.714772
CCG	0.141506	0.147655	0.126725	0.165841	0.125701	0.155188	0.101509	0.184406	0.328567	0.0125479	0.00166096	0.1679	0.501836	0.352025	0.298052	0.243126	0.237676		CCG	0.192621	0.213038	0.0944528	0.131032	0.167054	0.160441	0.167653	0.152292	0.705229	-0.00233434	0.140215	0.0980467	0.274432	0.118924	0.16833	0.144122	0.0997067		CCG	0.222503	0.155579	0.131349	0.150072	0.201349	0.111414	0.150694	0.132465	0.581546	-0.1691	0.636644
CCT	0.0486517	0.0554402	0.0612485	0.0330915	0.0292529	-0.00422233	-0.00331048	-0.0437526	0.40245	0.0285261	0.116793	-0.00782594	0.760777	-0.0188044	0.278136	0.228996	0.0767631		CCT	0.0975651	0.0832049	0.0450883	0.00240781	0.0164392	0.10158	0.0962912	0.105159	0.581847	0.0691246	0.141053	0.0403338	0.309921	0.0278842	0.143681	0.13449	0.0871827		CCT	0.102742	0.0760484	0.0665843	-0.0180524	0.0471519	0.0265625	0.0274998	-0.00188056	0.228141	-0.249486	0.58629
CGA	0.267257	0.241132	0.229512	0.197502	0.180757	0.188004	0.23126	0.152868	0.311745	0.105165	0.171904	0.128385	-0.357351	-0.274672	0.0980883	0.0300198	-0.0759798		CGA	0.122734	0.0410441	0.0732014	0.148659	0.065538	0.169234	0.128533	-0.0848899	0.395502	0.129128	0.26713	0.0682383	0.0334329	-0.151443	0.196389	0.23874	0.0720571		CGA	0.24253	0.297672	0.236344	0.203026	0.194909	0.192978	0.180233	0.0712879	0.0644196	-0.136467	0.337548
CGC	0.124147	0.128391	0.110388	0.0931731	0.0576944	0.0808991	0.106797	0.177588	0.49445	0.0574994	0.256075	0.17549	-0.126327	0.0884022	0.172623	0.194401	0.1236		CGC	0.127995	0.139317	0.0712145	0.119767	0.17197	0.0427175	0.0802109	0.145135	0.0884106	0.380532	0.0546531	0.207437	0.0621033	-0.0973255	0.080573	0.041126	-0.00675134		CGC	-0.0101651	0.133886	0.0847238	0.0869844	0.22313	0.154846	0.0964623	0.132902	0.116165	-0.51088	0.346223
CGG	0.0740526	0.124696	0.185268	0.0882319	0.131694	0.192219	0.121235	0.190392	0.580091	-0.00584174	0.150732	0.17168	0.617828	-0.451235	0.287645	0.0439174	0.337254		CGG	0.0649571	0.223688	0.299712	0.409824	0.285658	0.0172751	-0.0668807	0.222086	0.358469	0.453495	0.18168	0.203546	0.23522	0.124149	0.144675	0.241998	0.142856		CGG	0.139929	0.2572	0.173569	0.147104	0.178783	0.111942	0.204801	0.113614	0.530021	-0.221035	0.504428
CGT	-0.00208675	-0.0232595	-0.0199289	0.00826926	-0.0077681	-0.0480345	-0.0239648	-0.0696979	0.340106	-0.0844167	0.0991619	-0.130229	-0.209249	-0.238711	0.171473	0.12397	0.0724683		CGT	-0.034593	0.0034366	0.0366157	-0.0250569	0.00356071	-0.055323	-0.0530797	-0.00396833	0.308605	0.25006	0.199617	0.0725105	-0.08884	-0.100327	0.0686824	0.0854981	0.104584		CGT	-0.0769407	-0.0365721	-0.0218813	-0.11279	-0.130053	-0.0022415	-0.00440968	-0.0666132	0.210127	-0.964755	0.404225
CTA	0.0207995	0.0157182	-0.0152097	-0.000880003	-0.0346043	0.00267334	0.00941371	0.101241	0.0819933	-0.204613	0.140689	0.10646	-0.125931	0.0507078	0.172936	-0.035241	-0.335063		CTA	0.0137575	-0.0480068	-0.0272627	-0.0097847	-0.0195865	0.0802716	-0.00296093	0.0380573	-0.0746667	0.0835019	0.0842543	0.0118831	-0.169162	0.0308984	0.093263	-0.0595245	-0.125867		CTA	0.0293794	-0.0173383	-0.0227295	0.0441636	-0.00931687	0.0264643	0.0726943	-0.00725009	-0.583071	-0.243151	0.221305
CTC	0.0632725	0.0198734	0.0518966	0.118954	0.106136	0.106872	0.122223	0.0603835	0.396494	0.131066	0.391078	0.301805	-0.263618	0.0262197	0.25437	0.203944	0.147053		CTC	0.0825987	0.0323981	0.149177	0.0989592	-0.039136	0.019872	0.122986	-0.0659252	-0.115638	0.212519	0.141056	0.134303	-0.0201474	-0.106621	0.0793811	0.060769	0.0562874		CTC	0.129384	0.0958435	0.134623	0.191356	0.114853	0.105453	0.0448011	0.117346	0.0210459	-0.119195	0.285446
CTG	0.113262	0.0646523	0.0551659	0.0956675	0.0723742	0.0410277	0.0729446	0.0520474	0.294176	-0.147374	0.159764	0.317853	-0.102372	0.0221659	0.241353	0.0995898	0.295071		CTG	0.126933	0.00162136	0.0614056	0.114711	0.102337	0.151362	0.140958	0.107988	0.251506	0.0706565	0.236945	0.118228	-0.00238713	0.098174	0.181724	0.0336457	0.180093		CTG	0.122642	0.108248	0.158403	0.120228	0.0846296	0.0599388	0.0881491	0.116077	0.382736	-0.529839	0.512093
CTT	0.0706466	0.0745466	0.0909637	0.0769533	0.0674418	0.0950332	0.0796637	0.0152291	0.225754	-0.092709	0.202628	0.109677	-0.0171829	-0.144443	0.230653	0.215415	0.166582		CTT	0.0726318	0.104765	0.073975	0.0649906	0.0514476	0.141959	0.0621711	0.0919407	0.0831911	0.110475	0.162834	0.118942	-0.0136884	-0.0468546	0.138257	0.131025	0.321082		CTT	0.0941284	0.102488	0.102423	0.0333449	0.0656472	0.137449	0.0635669	0.168292	0.0996314	-0.326366	0.401813
GAA	-0.0793828	-0.0887798	-0.11893	-0.0903596	-0.0693834	-0.0909674	-0.103928	-0.0878354	0.06011	0.0657936	-0.283934	-0.140731	-0.129403	0.267248	-0.287406	-0.122233	-0.593995		GAA	-0.118873	-0.0949815	-0.100804	-0.115408	-0.118652	-0.130476	-0.103361	-0.207131	-0.454563	-0.0863858	-0.265648	-0.0850764	-0.0281017	0.192944	-0.121233	-0.0148577	-0.196813		GAA	-0.122464	-0.120767	-0.120428	-0.14187	-0.115356	-0.129436	-0.130379	-0.154343	-0.592877	0.332783	-0.855176
GAC	-0.0278365	-0.0703506	-0.0717036	-0.0811698	-0.0678202	-0.0724503	-0.114529	-0.077406	0.196976	0.0487579	-0.0355147	0.0969203	0.153384	0.0805295	-0.176367	-0.0578501	0.0133853		GAC	-0.0386279	-0.0656663	-0.0950638	-0.102059	-0.11364	-0.0661251	-0.0497384	-0.117923	-0.924362	-0.0206626	-0.20661	-0.0376944	0.043007	-0.0665532	-0.21664	-0.12125	-0.175505		GAC	-0.0658811	-0.0943787	-0.0650859	-0.112943	-0.0823241	-0.123919	-0.0839069	-0.114441	-0.278517	0.247598	-0.859301
GAG	0.00434799	0.0273035	-0.00792842	-0.0092127	-0.00847279	-0.0299583	-0.0534662	-0.054722	0.286382	0.242195	-0.126794	0.108227	0.183545	0.458103	-0.0750846	-0.00837225	0.334512		GAG	0.00115843	0.031522	0.0129825	0.0345108	0.00393364	0.0214824	0.0620903	0.0598299	-0.274621	-0.0312748	-0.041225	0.127337	0.208677	0.324612	0.103951	0.0707502	0.232452		GAG	0.00909107	0.00030008	0.00834549	-0.00186895	0.0139269	0.00224753	0.0271092	-0.040985	0.39954	0.276321	-0.315994
GAT	0.00514639	-0.0047809	-0.0297914	-0.0180585	-0.00645352	-0.0332162	-0.0513624	-0.177674	0.13051	-0.033477	-0.137278	-0.0440599	0.196719	-0.0946665	-0.166773	-0.0105608	0.117119		GAT	-0.040275	-0.0143592	-0.0429054	-0.0211283	-0.000405236	-0.0145358	-0.0444296	-0.0238121	-0.793524	-0.174138	-0.168718	-0.029811	0.118908	-0.0343977	-0.102103	-0.00497291	0.178678		GAT	-0.00359386	-0.0510991	-0.0238931	-0.0415037	-0.0274739	-0.032645	-0.0469953	-0.0559535	0.0518662	0.173043	-0.695431
GCA	0.0101959	0.0333916	0.0335088	0.0209004	-0.0153698	0.00397847	-0.00775662	0.0881701	-0.250774	0.241817	0.0612343	0.126335	-0.311091	0.135827	-0.24381	-0.0144553	-0.425185		GCA	0.0452429	0.0401113	0.0255031	0.0356286	-0.00948202	0.0425465	0.0136758	0.0188106	0.361195	-0.0763039	-0.118442	-0.0167618	-0.104684	0.0230902	-0.111243	-0.0857738	-0.254295		GCA	0.0349446	0.0483758	0.0417231	0.0319874	0.0334958	0.0153385	-0.00947966	0.0386008	-0.417265	0.707333	-0.308439
GCC	-0.0802631	-0.0642849	-0.0894286	-0.0797025	-0.0953167	-0.0883991	-0.0806858	-0.00363138	0.095636	0.357752	0.174248	0.0333797	0.00361135	0.125242	-0.227822	-0.014157	-0.0934725		GCC	-0.119174	-0.0818384	-0.109615	-0.0903946	-0.087563	-0.0924853	-0.0671806	-0.0461566	0.103111	0.113434	-0.0995533	-0.0573836	-0.0336487	-0.0135984	-0.159879	-0.0491085	-0.363071		GCC	-0.140602	-0.113907	-0.106863	-0.159243	-0.128533	-0.0823722	-0.0871441	-0.0568334	-0.121415	0.662377	-0.701438
GCG	0.012061	0.0732624	0.0247422	0.0557345	0.0602628	0.044232	0.0649871	0.105149	0.100801	0.390279	0.11331	0.268283	-0.5023	-0.164765	-0.0821106	0.100079	0.288398		GCG	0.0299553	0.027251	0.0656253	-0.0435024	0.110309	0.0989109	-0.0193934	0.124335	0.535976	0.054458	-0.00621188	0.188519	-0.147381	-0.0532529	-0.0510571	0.104436	0.188722		GCG	0.0747934	0.109833	0.127839	0.0473292	0.0457558	0.105897	0.0430365	0.0954408	0.422876	0.63772	-0.0473109
GCT	-0.114202	-0.130171	-0.122198	-0.129779	-0.131702	-0.114065	-0.134463	-0.25005	-0.106331	0.23164	0.0649471	-0.0673408	0.030146	-0.117621	-0.24997	0.00330713	-0.0458894		GCT	-0.154519	-0.109347	-0.136412	-0.125683	-0.137466	-0.133117	-0.145233	-0.116727	0.104126	-0.151866	-0.144744	-0.0902434	-0.0233272	-0.204063	-0.225125	-0.0823331	-0.0844643		GCT	-0.182618	-0.201431	-0.199641	-0.20159	-0.150882	-0.170002	-0.197108	-0.218807	0.0736619	0.714171	-0.659797
GGA	0.0183824	0.0113771	0.0385442	0.0271018	0.0523755	0.0494635	0.0573473	0.101959	0.330286	0.172815	-0.00832343	0.0856898	0.265345	0.215799	-0.100736	0.0118596	-0.218813		GGA	0.0612924	0.116457	0.103346	0.0559606	0.0212586	0.0891871	0.075752	0.00745011	0.137554	0.162834	0.0669351	0.148395	0.245511	0.252326	0.00914369	0.121576	-0.0453313		GGA	0.100525	0.0617048	0.0679353	0.0311715	0.0947046	0.0508292	0.0464187	0.0685019	-0.300142	0.466034	-0.425292
GGC	-0.0107605	-0.019981	-0.0117505	-0.0644413	-0.000834328	-0.0290978	0.00860336	0.0996913	0.361906	0.243948	0.15164	0.101082	0.19115	0.339604	-0.0585459	0.00745323	0.0869155		GGC	-0.0554185	0.00528154	0.00484801	-0.0133958	0.00656324	-0.013793	-0.0490742	0.013672	-0.240633	0.237756	0.0332358	0.0828589	0.0934036	0.237404	0.0102244	0.0783862	-0.00585846		GGC	0.0169859	-0.0107545	-0.0206954	0.00640197	0.0214122	-0.0308014	-0.0432941	0.0143612	-0.0256759	0.314731	-0.587246
GGG	0.0486396	0.0704953	0.0141345	0.0651619	0.0559302	0.0549564	0.0664635	0.0359963	0.459299	0.360558	0.07602	0.298365	0.223522	0.562804	0.12081	0.149273	0.314047		GGG	0.0378187	0.0733665	0.0209145	0.0733083	0.136141	0.0814747	0.0658029	0.08767	0.494477	0.21294	0.175396	0.231695	0.284055	0.469504	0.231795	0.175079	0.284926		GGG	0.0802193	0.143597	0.106094	0.111635	0.0837707	0.0762625	0.0161643	0.0810965	0.495214	0.552645	-0.160957
GGT	-0.100745	-0.128418	-0.0907535	-0.124397	-0.113678	-0.134798	-0.120551	-0.214805	0.205246	0.0138084	-0.124722	-0.177559	0.148187	-0.00422377	-0.221206	-0.0571719	0.02736		GGT	-0.0837364	-0.105981	-0.102553	-0.099622	-0.135249	-0.11701	-0.106684	-0.124986	-0.153984	0.0836785	-0.103672	-0.0357022	0.126401	0.00735077	-0.133869	-0.0309055	-0.000298472		GGT	-0.157469	-0.161005	-0.162297	-0.147709	-0.196276	-0.136557	-0.181544	-0.200372	0.102133	0.229569	-0.836485
GTA	0.0757928	0.0449151	0.0492751	0.0360054	0.0164905	0.0499831	0.0546205	0.108745	-0.0246151	0.0562182	0.0484413	-0.104709	-0.240347	0.148971	-0.188526	0.0280393	-0.210513		GTA	0.0749953	0.032287	0.0948241	0.00250725	0.0249982	0.0355821	-0.00212658	-0.0148126	-0.149528	-0.055752	-0.073583	-0.0306869	-0.070546	0.063432	-0.0088511	0.0120891	0.0132211		GTA	0.0481564	0.115859	0.0861586	0.109951	0.0603679	0.0537884	0.0882229	0.107226	-0.461562	0.254301	-0.39456
GTC	-0.122564	-0.114424	-0.150115	-0.130557	-0.109014	-0.105073	-0.0910994	-0.0744276	0.0531893	0.0761909	0.100649	-0.186223	-0.48218	-0.0472553	-0.190572	-0.0508685	-0.0304781		GTC	-0.115105	-0.176438	-0.154087	-0.209561	-0.101888	-0.157862	-0.11434	-0.127229	-0.48413	-0.0703968	-0.161771	-0.163222	-0.313879	-0.123372	-0.177556	-0.120426	-0.223429		GTC	-0.193499	-0.173297	-0.212536	-0.207811	-0.195694	-0.162852	-0.1722	-0.12753	-0.491395	0.0332974	-0.843432
GTG	0.0688037	0.0577641	0.0223536	0.0226284	0.0294529	0.0659707	0.0426003	0.0816083	0.248196	0.127728	-0.0147493	-0.12785	-0.000528481	-0.0120644	-0.119711	-0.0100437	0.288761		GTG	0.0986502	0.0551724	0.065765	0.0708809	0.0500438	0.0304159	0.131034	0.127314	0.113319	0.0349776	0.0436184	-0.0584283	0.0249842	0.0325769	-0.0576968	0.0413304	0.223569		GTG	0.0321151	0.0610987	0.0544215	0.0593548	0.0428358	0.082917	0.0864723	0.0951191	0.451135	-0.0286642	-0.156832
GTT	-0.0900309	-0.0842874	-0.0486796	-0.050392	-0.0903189	-0.0894661	-0.0640392	-0.18586	0.0439545	0.0331803	-0.00746533	-0.282057	-0.361783	-0.0583387	-0.221586	0.0137583	0.14682		GTT	-0.0772043	-0.0758328	-0.0817342	-0.102199	-0.0915162	-0.0637462	-0.112506	-0.0905969	-0.193067	-0.102421	-0.134994	-0.119824	-0.292212	-0.123522	-0.16712	-0.00655191	0.161653		GTT	-0.13542	-0.116291	-0.122292	-0.110981	-0.0911372	-0.064216	-0.13538	-0.127665	-0.0639469	0.0365284	-0.615373
TAC	-0.0996551	-0.0870901	-0.0970299	-0.0871963	-0.0759076	-0.0989025	-0.0688859	-0.0187892	-0.0793302	-0.153149	-0.168576	-0.208519	-0.275585	0.383041	-0.0351629	-0.168816	-0.0314682		TAC	-0.14226	-0.177963	-0.0658484	-0.0839918	-0.139525	-0.105271	-0.0833715	-0.0568185	-0.72841	-0.124396	-0.181611	-0.162619	-0.336259	0.127578	-0.0912599	-0.208898	-0.179549		TAC	-0.148288	-0.141388	-0.0927694	-0.0887983	-0.142302	-0.132296	-0.103974	-0.0967382	-0.281925	-0.377604	-0.178417
TAT	-0.0137748	-0.00306056	-8.64581e-05	0.0352496	0.0233677	0.0330694	0.0406122	-0.083778	-0.167501	-0.175352	-0.16124	-0.274554	-0.15508	0.28342	-0.0047986	0.0107783	0.124771		TAT	-0.010194	0.0528227	0.0647583	0.00806241	0.114487	0.0511151	0.0478366	0.0758507	-0.605511	-0.0816111	-0.040125	-0.0208234	-0.111556	0.176922	-0.0040699	0.0588024	0.288014		TAT	0.0305779	0.0145406	0.0139585	0.0773974	0.0285896	0.0262032	0.0607422	0.0722036	0.150549	-0.0540953	0.0407116
TCA	0.0386076	0.0407701	0.0329084	0.0561906	0.0320566	0.0151766	0.0136588	0.124103	-0.431005	-0.0246193	0.00387037	0.0754414	-0.0117241	0.127796	0.059851	0.0113837	-0.235092		TCA	0.105922	0.0626315	0.049422	0.054452	0.0276649	0.027993	0.0631198	0.00092694	0.258383	-0.08599	0.0292213	-0.00836768	0.00678202	0.0380527	0.0270158	-0.00377338	-0.0637425		TCA	0.116616	0.0898471	0.112459	0.106028	0.0675162	0.0914113	0.105683	0.0795327	-0.397537	0.3093	0.213448
TCC	-0.0886651	-0.0798879	-0.0952458	-0.0431264	-0.0685496	-0.0478819	-0.0604984	-0.0226244	0.089998	0.210079	0.209807	0.150929	0.314975	0.340474	0.227625	0.154599	0.00411369		TCC	-0.123594	-0.060082	-0.0937785	-0.0191402	-0.0924507	-0.0909643	-0.0985606	-0.0773507	0.168716	0.0722579	0.0694978	0.0462615	0.169841	0.226745	0.106012	0.0691385	-0.235485		TCC	-0.156575	-0.10934	-0.115207	-0.0731617	-0.114013	-0.0537528	-0.0710793	-0.10494	-0.188374	0.0601087	0.236392
TCG	0.0878436	0.0542246	0.0758832	0.0757753	0.107937	0.0951081	0.104842	0.116932	-0.0552861	0.0498348	-0.0478075	0.198399	0.0750582	0.14455	0.197435	0.0837572	0.25198		TCG	0.111234	0.124846	0.0418552	0.0611775	0.158285	0.16027	0.125242	0.123087	0.427399	0.0556322	0.0397891	0.126707	0.0739168	0.065918	0.0337209	0.108513	0.0860369		TCG	0.178613	0.13853	0.146221	0.10425	0.150933	0.119306	0.173505	0.130758	0.393501	0.345515	0.367379
TCT	-0.0593285	-0.0732392	-0.0632063	-0.0371852	-0.0478008	-0.00845965	-0.0504994	-0.205054	-0.126945	0.0250702	0.0172716	0.00699244	0.279756	0.0353717	0.14874	0.129888	0.0441749		TCT	-0.0576126	-0.0422539	-0.0638239	-0.0603776	-0.0686602	-0.0548983	-0.0675563	-0.0536008	0.126006	-0.185595	-0.000104037	-0.0289905	0.0988431	-0.0706699	0.0173508	0.0510534	-0.00879185		TCT	-0.11308	-0.0703293	-0.0700525	-0.0611214	-0.0398377	-0.0461257	-0.0666385	-0.0422957	0.0980734	0.129831	0.12919
TGC	-0.0111546	-0.0152146	-0.00995601	0.0583764	0.0524343	0.051432	0.0459734	0.0626419	0.134268	0.1102	0.0532651	-0.215301	0.153806	-0.0278386	0.0981457	0.0251979	-0.0637284		TGC	-0.0172241	0.0156405	0.115567	0.105815	-0.0860148	-0.0377028	0.103107	0.0648962	-0.226876	0.0717664	0.0820732	-0.064245	0.012446	0.0299629	-0.00165988	-0.0278844	-0.144651		TGC	-0.00378879	0.10691	0.00396165	0.0559026	0.00700544	0.0972183	-0.0425735	0.0814383	0.0394981	-0.0915878	0.0475394
TGG	0.00383166	-0.0117452	0.0122996	0.00608062	0.00496624	-0.00114939	-0.0435824	-0.0191474	0.105613	-0.201964	-0.261988	-0.104085	-0.397937	-0.414121	0.0244437	-0.0954807	0.166144		TGG	0.0194883	0.0734317	0.0178238	-0.053363	-0.0703071	-0.0180435	-0.0173765	0.00241907	0.243511	0.0185435	-0.0756321	-0.0803156	-0.133211	-0.21967	0.0171599	-0.00715741	0.0976874		TGG	0.0357454	-0.038693	-0.00893952	-0.0159859	-0.0479124	-0.08928	-0.0182989	-0.0639053	0.491345	-0.111127	0.29506
TGT	-0.0776391	-0.0330499	-0.0573141	-0.0712969	0.00051927	-0.0394664	-0.0672163	-0.112664	-0.0960663	-0.0976735	-0.156748	-0.431045	0.230042	-0.432215	-0.0176293	-0.0562866	0.0600113		TGT	-0.0242168	-0.0457087	-0.0814883	-0.0827952	-0.0212006	-0.00549947	-0.133257	-0.075329	-0.139942	-0.0669705	-0.0587024	-0.203781	0.0433679	-0.183045	-0.0286534	-0.0689043	0.0871843		TGT	-0.0299216	-0.0827416	-0.0945266	-0.0759694	-0.0302798	0.0558915	-0.0690492	-0.0340479	0.11058	-0.154449	0.0180603
TTA	-0.0371555	-0.0522906	-0.0150404	-0.0100553	-0.00496096	0.00166913	-0.0072187	0.110267	-0.478868	-0.154057	-0.0443545	-0.0730698	-0.171741	-0.0187647	-0.047643	-0.0722521	-0.0804166		TTA	-0.0166571	-0.00726258	-0.0462682	-0.0202021	0.0110545	0.00663111	-0.00688013	-0.00282676	-0.32555	-0.0464331	-0.0558983	-0.101765	-0.0659579	-0.0319871	0.0188249	-0.0191911	0.144028		TTA	-0.0121762	-0.00564321	-0.0421173	0.00860079	0.00285366	0.017741	0.0280033	0.0431193	-0.625373	0.100333	-0.0555983
TTC	-0.0830921	-0.0732244	-0.0186508	-0.0837155	-0.0723136	-0.0495418	-0.0385717	-0.024755	-0.247237	-0.0375384	-0.0263262	-0.121379	-0.102824	0.092739	0.129559	-0.0328854	-0.00943631		TTC	-0.0880026	-0.100868	-0.071879	-0.100863	-0.0693546	-0.0637495	-0.0708234	-0.080252	-0.468903	0.0170847	-0.126656	-0.105358	-0.125098	-0.0379805	0.0451634	-0.0683631	-0.105221		TTC	-0.12744	-0.134546	-0.0900042	-0.0807734	-0.103441	-0.127696	-0.0549056	-0.0675405	-0.343557	0.128815	-0.21407
TTG	-0.109243	-0.13797	-0.0824503	-0.0756716	-0.0630255	-0.0916573	-0.0973102	-0.113933	-0.391704	-0.248843	-0.128361	-0.0439396	-0.126468	0.035276	-0.0393221	-0.158329	0.15737		TTG	-0.134954	-0.155345	-0.112591	-0.127491	-0.0725342	-0.0894666	-0.0910295	-0.08231	-0.0706761	-0.231791	-0.088993	-0.144942	-0.173716	-0.00198999	-0.0503434	-0.191769	0.0282652		TTG	-0.143305	-0.133286	-0.166947	-0.146716	-0.121748	-0.137675	-0.135968	-0.142982	0.308297	-0.203367	0.0839582
TTT	0.00677823	0.0254255	0.0264788	0.0342939	0.0298966	0.0437161	0.0650537	-0.0378854	-0.338193	-0.125259	-0.104456	-0.315882	-0.118671	-0.101273	0.0787502	0.100076	0.213617		TTT	0.0177446	0.0324234	0.00311858	0.0378986	0.0273817	0.0434463	0.0537696	0.045343	-0.145783	-0.0456148	-0.0453834	-0.0667119	-0.073145	-0.0849288	0.0575503	0.0526639	0.390231		TTT	0.0363542	0.0450822	0.0354317	0.0546196	0.0328145	0.0453692	0.0567971	0.0156595	0.133834	0.106876	-0.0562237
[truncated: 60 more columns]

[truncated: 1 more sheets: Supplemental_Figure_S34]
