# Supplementary material for: Accounting for biases in riboprofiling data indicates a major role for proline in stalling translation
Source: HighWire-hosted journal article supplement (doi:10.1101/gr.175893.114), 2014-10-07
Supplement: Supplemental_Table_S4.xlsx [file Supplemental_Table_S4.xlsx]

## Sheet: Sheet1
Supplemental Table S4. Ribosome profiling datasets examined in this study. Datasets analyzed in the manuscript met the criteria of having paired mRNA and Ribo fractions size-selected
for the expected length of ribosome protected fragments. In addition, both fractions were prepared using identical protocols. Additional datasets are also presented with information
as to why they were unsuitable for analysis.
DATASET	ACCESSION	SPECIES	NOTES
Used in the present study:
Ingolia et al. 2009. Science. 324:218-223.	GEO: GSE13750	S. cerevisiae
Artieri and Fraser. 2014. Genome Res. 24:411-421.	GEO: GSE50049	S. cerevisiae/S. paradoxus
McManus et al. 2014. Genome Res. 24:422-430.	GEO: GSE52119	S. cerevisiae/S. paradoxus
Stadler and Fire. 2013. PLoS Genet 9:e1003739.	GEO: GSE48140	C. elegans
Bazzini A et al. 2014. EMBO J. 33:981-993.	GEO: GSE53693	D. rerio
Additional studies
Dunn et al. 2013. Elife 2:e01179.	GEO: GSE49197	D. melanogaster	MNase creates known sequencing biases; Paired Ribo/mRNA fractions unavailable
Ingolia et al. 2011. Cell 147:789–802.	GEO: GSE30839	M. musculus	Libraries selected at different fragment sizes; Paired Ribo/mRNA fractions unavailable
Shalgi et al. 2012. Mol Cell. 49:439–452.	GEO: GSE32060	M. musculus	Ribo/mRNA libraries constructed using different protocols
Thoreen et al. 2012. Nature. 485:109–113.	GEO: GSE36892	M. musculus	Unclear if mRNA fractions paired; Low coverage
Howard et al. 2013. J Biol Chem. 288:19401-19413.	Not available	M. musculus	Libraries selected at different fragment sizes
Guo et al. 2010. Nature. 466:835-840.	GEO: GSE22004	H. sapiens	No mRNA fraction
Lee et al. 2012. Proc Nat Acad Sci USA. 109:E2424–E2432.	SRA: SRA056377	H. sapiens	No mRNA fraction
Han et al. 2012. Proc Nat Acad Sci USA. 109:12467–12472.	Not available	H. sapiens	No mRNA fraction
Reid DW and Nicchitta CV. 2012. Biol Chem. 287:5518-5527.	GEO: GSE31539	H. sapiens	Ribo/mRNA libraries constructed using different protocols
Liu et al. 2013. Mol Cell. 49:453–463.	SRA: SRA061778	H. sapiens	No mRNA fraction
Wiita et al. 2013. Elife. 2:e01236.	GEO: GSE48785	H. sapiens	Ribo/mRNA libraries constructed using different protocols
Stumpf et al. 2013. Mol Cell. 52:574-582.	SRA: SRA099816	H. sapiens	Libraries selected at different fragment sizes
Liu et al. 2013. Plant Cell 25:3699-3710.	GEO: GSE43703	A. thaliana	Libraries selected at different fragment sizes
Juntawong P et al. 2014. Proc Natl Acad Sci U S A. 111:E203-12.	GEO: GSE50597	A. thaliana	Ribo/mRNA libraries constructed using different protocols
Vasquez et al. 2014. Nucl Acids Res. 42: 3623-3637.	ENA: PRJEB4801	T. brucei	Libraries selected at larger than ribosomal footprint fragment sizes
GEO (NCBI Gene Expression Omnibus); SRA (NCBI Sequence Read Archive); ENA (European Nucleotide Archive)
